# Supplementary material for: Isotopic evidence of high reliance on plant food among Later Stone Age hunter-gatherers at Taforalt, Morocco
Source: PubMed Central journal article supplement (PMC11090808; doi:10.1038/s41559-024-02382-z), 2024-04-29

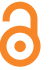

---

# Isotopic evidence of high reliance on plant food among Later Stone Age hunter-gatherers at Taforalt, Morocco

---

In the format provided by the authors and unedited

1

2

3 This PDF file contains:

4 **Supplementary Information 1: Archeological context**

5 **Supplementary Information 2: Details on isotope proxies used in this study**

6 **Supplementary Information 3: Material and Methods**

7 **Supplementary Information 4: Results**

8 **Supplementary Information 5: Additional discussion**

9 **Supplementary Information 6: Supplementary figures and tables**

10 **Supplementary Information 7: 3D models of the human teeth and sampling strategy**

11

# 12 1. Supplementary Information 1: Archeological context

13

## 14 1.1 The site of Taforalt “Grotte des Pigeons”

15 The cave site of Taforalt (also known as La Grotte des Pigeons) is located in eastern Morocco (34°  
16 48' 38" N, 2° 24' 30" W) approximately 500m northeast of the village Tafoughalt from which it  
17 derives its name. The site is approximately 40km inland from the Mediterranean Sea and at an  
18 altitude of 750m above sea level. The cave is a large dolomitic limestone cavity formed in the Beni  
19 Snassen Mountains and opens to Northeastern with 30m in width and 15m in length <sup>1</sup>.

20 The site was first discovered by Dr. Pinchon in 1908, since then the cave was the subject of several  
21 excavations. The first excavations were initiated by Ruhlmann from 1944 to 1947 where he made  
22 two surveys: in the central and the right lateral part of the cave and he reached the bottom of the  
23 fill inside the cavity. His works have provided insight into the nature of the archeological deposits  
24 which span the Aterian (Middle Stone Age) and the Iberomaurusian (Later Stone Age) (Roche,  
25 1976). From 1950 to 1955 Roche carried out a systematic excavation of the the ashy layers which  
26 he described them as an Iberomaurusian occupation. During his campaign, he uncovered an  
27 extensive series of burials in the grey ashy deposits. This includes the two burial areas (designated  
28 Necropolis I and II). Moreover, he recovered multiple human graves which were analyzed by  
29 Ferembach in 1962. Further excavations were carried out from 1969 to 1979 to acquire detailed  
30 information about the archaeological and geological aspects <sup>2</sup>. From 2003 to 2017, new work was  
31 conducted on the Iberomaurusian sequence of Taforalt. These new investigations of the  
32 Iberomaurusian sequence described two main units<sup>1,3</sup>:

33 **The Yellow Series (YS):** The underlying deposit, known as the Yellow series, is associated with  
34 the early Iberomaurusian phase, dated around 22,292-21,825 cal BP<sup>1</sup>. This series extends from  
35 approximately 22,292 cal BP to around 15,000 cal BP, marking a clear sedimentation change in  
36 the Iberomaurusian deposits around 15,190-14,830 cal BP<sup>1</sup>.

37 **The Grey Series (GS):** The upper unit refers to the grey ashy deposits of the Iberomaurusian  
38 occupation with a 4m-thickness and it is dated between 15,000 and 12,600 cal B.P. The  
39 sedimentary change between the YS and GS coincides with a change in subsistence strategy by  
40 the Iberomaurusians<sup>1</sup>. The recent excavations revealed a series of primary burials in sector 10 in

41 the grey ashy deposits and evidence show that this area was reused several times because earlier  
42 burials were disturbed by subsequent ones.

### 43 **1.2 The human burials at Taforalt**

44 The recent excavations (2003-2017) revealed a series of additional burials including twelve  
45 partially articulated skeletons (seven adults and five infants). This disarticulation indicates the  
46 intensive use of the area. In addition to that, an almost complete infant skeleton and a broken  
47 cranium alongside a mandible were discovered in the same area. The cemetery mainly includes  
48 primary burials which indicate that death happened not too far from the site. Furthermore, there  
49 are some secondary depositions of skeletal elements with post-mortem modifications (removal of  
50 soft tissues). There are two suggested hypotheses for these secondary burials, either the individuals  
51 died elsewhere –which could suggest a seasonal occupation of the site– and some selected parts  
52 were carried to the site for burial or these burials simply reflect a change in funerary practices over  
53 time<sup>4,5</sup>.

54 However, most of the discovered skeletons were buried in a seated or semi-reclined position. The  
55 majority of the individuals were facing towards the entrance of the cave. The bodies were probably  
56 surrounded by a pocket of empty space during their decomposition and were covered by organic  
57 materials because of the partial loss of anatomical articulation of skeleton elements. It should be  
58 mentioned that many burials were associated with funerary objects like horn cores and stones  
59 stained with ochre <sup>6</sup>.

60 Seven human bone samples from Sector 10 (GS) have been directly dated by radiocarbon  
61 accelerator mass spectrometry (AMS) using ultrafiltration giving dates that span the period of  
62 15,077 cal BP and 13,892 cal BP<sup>4</sup>. Details regarding the human burials and their archaeological  
63 context are published in a monograph<sup>2</sup>.

64  
65  
66  
67  
68

### 69           **1.3 The Iberomaurusian culture**

70 In Northwest Africa, the end of the Late Pleistocene is associated with the Iberomaurusian culture  
71 characterized by bladelets and microlithic backed tools, which marks a technological break with  
72 the antecedent Aterian (Middle Stone Age)<sup>7,8</sup>. The Iberomaurusian culture first appeared around  
73 25,000 cal BP in North Africa<sup>8</sup> and may have persisted into the Holocene after 11,600 cal BP<sup>9</sup>.  
74 The Iberomaurusian culture has covered a vast geographical area stretching from modern day  
75 Morocco in the west (10°W) to Cyrenaica in the east (22°E). However, its southern extension is  
76 still not well understood but it reaches up to about 33°N along the Atlantic coast. The term of the  
77 "Iberomaurusian" was coined by Pallary in 1909. He used this term to refer to an assemblage  
78 primarily composed of microlithic tools, which he discovered under the shelter of La Mouillah  
79 (Oran region, west Algeria). The second part "maurusian" refers to the Moors which is a Roman  
80 name for North African population. Pallary used the term "Ibéromaurusien" to draw attention to  
81 the similarities between the lithic industries found in Spain and Morocco. However, the cultural  
82 link with southern Europe was later rejected by archaeologists who noted stronger African  
83 affinities. Instead they adopted alternative names such as "Oranian" or "Mouillian". Recently some  
84 researchers proposed "Late Upper Palaeolithic of Northwest African facies" in order to avoid  
85 terminological confusion<sup>10</sup>. However, the scientific community prefers to keep the term of  
86 Iberomaurusian as proposed by Camps, 1974<sup>2</sup>. This term has always persisted in the literature and  
87 that is why we adopt it here.

### 88           **1.4 Faunal remains of Taforalt**

89 Several faunal taxa are recovered from the Later Stone Age deposits at Taforalt. The most common  
90 taxa are Barbary sheep (*Ammotragus lervia*), equids, large bovines, gazelles and members of the  
91 Alcelaphinae subfamily (hartebeest). Barbary sheep was the dominant species of game exploited  
92 by the Iberomaurusians at this site<sup>11</sup>. This can be easily explained by the location of the cave which  
93 corresponds to its preferred habitat (stony plateaus, steep valley slopes). The rest of the species are  
94 typical of open grassland or steppe. Butchery marks on the remains of Barbary sheep indicate it  
95 was primarily consumed by this population<sup>11</sup> (Supplementary Figure 1). The presence of Barbary  
96 sheep horn cores accompanying human burials in sector 10 suggests their use as funerary objects.  
97 The occurrence of these horn cores in both Taforalt's sector 10 and Afalou bou Rhummel<sup>12,13</sup> raises  
98 the intriguing possibility of common and synchronous idiosyncratic practices during the Late

99 Iberomaurusian across varied geographical regions. The study of the faunal assemblage from  
100 Taforalt indicates that the Iberomaurusians hunted all age-groups of herbivores but that prime  
101 adults were preferentially chosen<sup>11</sup>.

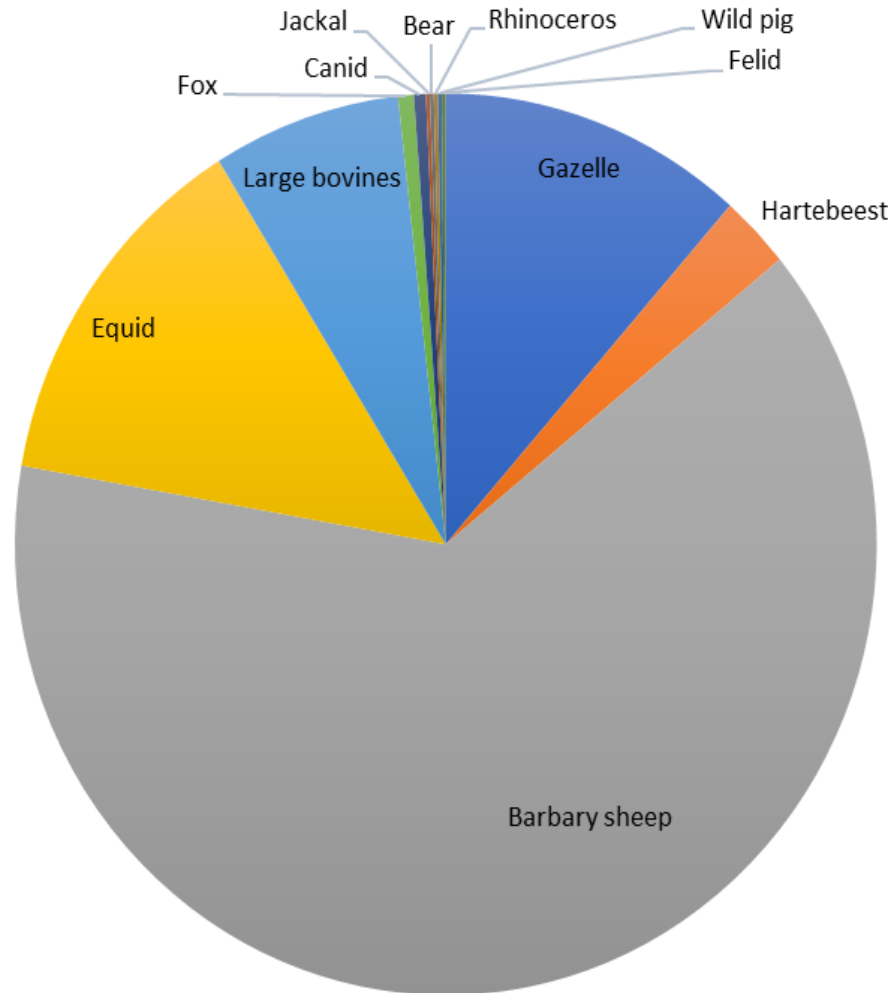

102 **Supplementary Figure 1:** The percentage of number of identifiable faunal species from sector 10 at  
103 Taforalt<sup>11</sup>  
104

105 **Supplementary Table 1** : List of the identifiable faunal species from sector 10 Taforalt<sup>11,14</sup>. NISP stands for number  
 106 of identified specimens.

107  
 108  
 109  
 110  
 111  
 112  
 113  
 114  
 115  
 116  
 117  
 118  
 119  
 120  
 121  
 122  
 123  
 124  
 125  
 126  
 127  
 128  
 129  
 130  
 131  
 132  
 133

| <b>Faunal remains sector 10</b>             |             |              |
|---------------------------------------------|-------------|--------------|
| <b>Taxa</b>                                 | <b>NISP</b> | <b>NISP%</b> |
| Barbary sheep ( <i>Ammotragus lervia</i> )  | 433         | 60.39        |
| Equid (Equidae)                             | 91          | 12.69        |
| Gazelle ( <i>Gazella sp.</i> )              | 78          | 10.88        |
| Large bovines                               | 48          | 6.69         |
| Hartebeest ( <i>Alcelaphus buselaphus</i> ) | 18          | 2.51         |
| Fox ( <i>Vulpes vulpes</i> )                | 4           | 0.56         |
| Canid (Canidae)                             | 3           | 0.42         |
| Jackal ( <i>Canis aureus</i> )              | 1           | 0.14         |
| Bear (Ursidae)                              | 1           | 0.14         |
| Rhinoceros (Rhinocerotidae)                 | 1           | 0.14         |
| Wild pig ( <i>Sus scrofa</i> )              | 1           | 0.14         |
| Felid (Felidae)                             | 1           | 0.14         |
| Total                                       | 681         | 95           |

## 134 2 Supplementary Information 2: Details on isotope proxies used in the 135 study

### 136 2.1 Carbon and nitrogen isotope ratios of bulk collagen and single amino acids

#### 137 2.1.1 Carbon and nitrogen isotopes of bulk collagen

138  
139 Nitrogen isotope ratios ( $\delta^{15}\text{N}_{\text{collagen}}$ ) reflect the trophic position of an individual in a food web<sup>15-17</sup>,  
140 as there is typically 3-5‰ increase in  $\delta^{15}\text{N}_{\text{collagen}}$  values between diet and consumer<sup>18</sup>. Carbon  
141 isotope ratios ( $\delta^{13}\text{C}$ ), on the other hand, provide information on the source of primary production  
142 at the base of the food web<sup>16,19</sup>. Carbon and nitrogen isotope analyses from bone proteins therefore  
143 provide valuable information on the past diet<sup>17,20-22</sup>.

144 However, collagen is susceptible to diagenetic alterations, which can potentially influence its  
145 isotopic composition<sup>23</sup>. To mitigate the impact of such alterations and ensure the integrity of our  
146 results, we employ the calculation of C:N ratios (2.9-3.6) as a quality control measure for the  
147 collagen, following the approach outlined by Ambrose in 1990<sup>24</sup>. This robust quality control step  
148 is essential in assessing the reliability of our collagen samples in the face of potential diagenetic  
149 influences on isotopic data.

150

151 Reconstructing the paleodiet using the bulk collagen has three major limits:

152 1) The utilisation of bulk collagen  $\delta^{13}\text{C}_{\text{collagen}}$  to reconstruct a marine and terrestrial diet is  
153 often limited in regions with mixed C3 and C4 environments. This is because of the overlap  
154 in  $\delta^{13}\text{C}_{\text{collagen}}$  values of C4 plants and high marine proteins consumers, both having  
155 relatively more positive values. Freshwater fish and terrestrial fauna can also exhibit  
156 similar  $\delta^{13}\text{C}_{\text{collagen}}$  values. Previous studies showed the limitation of estimating the marine  
157 food contribution in the diet of humans living in regions with mixed C3/C4 terrestrial  
158 environments<sup>25,26</sup>.

159 2) Bulk collagen  $\delta^{15}\text{N}_{\text{collagen}}$  isotope ratios are affected by several environmental and  
160 physiological factors in addition to the trophic level effect. For instance, elevated  
161  $\delta^{15}\text{N}_{\text{collagen}}$  values of herbivore tissues are documented in arid regions, and consequently  
162 lead to a misinterpretation of the trophic levels of humans<sup>27,28</sup>. In addition, there is a strong  
163 baseline effect impacting the  $\delta^{15}\text{N}_{\text{collagen}}$  and  $\delta^{13}\text{C}_{\text{collagen}}$  values of animals with similar diets,



164 but coming from different regions. This is due to environmental factors, such as the aridity,  
165 influencing the isotope composition of plants. It is often assumed that there is a 3.4‰  
166 increase per trophic level<sup>29</sup> but already Deniro and Epstein, 1981<sup>29</sup> observed a wide  
167 variation in  $\delta^{15}\text{N}_{\text{collagen}}$  trophic discrimination factors depending on the samples analysed (-  
168 0.5 to +9.2)<sup>29</sup>.

169 3) Another problem is related to the characterization of  $\delta^{15}\text{N}_{\text{collagen}}$  in the primary producers,  
170 like plants, which can display an important temporal and geographical variation, possibly  
171 because of the assimilation of nitrogen from different sources<sup>30</sup>. For example, plants that  
172 fix nitrogen from the soil ( $\text{NH}_4^+$ ,  $\text{NO}_3^-$ ) can exhibit distinct nitrogen isotopic signatures  
173 compared to those that fix nitrogen from the atmosphere ( $\text{N}_2$ )<sup>30</sup>. These differences in  
174 isotopic ratios are influenced not only by nitrogen sources but also by various location-  
175 specific environmental characteristics, such as precipitation, altitude, temperature, and  
176 salinity<sup>31,32</sup>.

## 177 2.1.2 Carbon and nitrogen on single amino acids

178  
179 Compound Specific Isotope Analysis of Amino Acids (CSIA-AA) has recently been used to  
180 overcome the methodological problems of bulk isotope analyses<sup>33</sup>. The use of this powerful new  
181 technique allows estimating more precisely the trophic position of organisms and eliminating the  
182 influence of environmental factors. The analyses of  $\delta^{13}\text{C}$  isotope value of Single Amino Acid  
183 (SAA) (Phe: Phenylalanine, Val: Valine) can clearly differentiate terrestrial from freshwater food  
184 resources while N isotope on SAA (Phe: Phenylalanine, Glu: Glutamic acid) elucidate the trophic  
185 position with more precision than possible with the bulk isotope analyses<sup>34,35</sup>.

### 186 ***2.1.2.1 Trophic position estimation using $\delta^{15}\text{N}$ of amino acids***

187  
188 One could estimate the Trophic Position (TP) of humans without need to characterize the  $\delta^{15}\text{N}$   
189 values of the associated fauna by analysing nitrogen isotope ratios of single amino acids,  
190 particularly the Phenylalanine (Phe) and the Glutamic acid (Glu). These amino acids serve as  
191 excellent tracers of the trophic level. The  $\delta^{15}\text{N}_{\text{Glu}}$  is significantly enriched for each trophic position  
192 (+8.00‰) because of the substantial isotopic fractionation occurring during the transamination.  
193 The  $\delta^{15}\text{N}_{\text{Phe}}$  shows only a slight change with each trophic position (+0.4‰) and mainly reflects the

194 local base line, which in turn influences the  $\delta^{15}\text{N}_{\text{Glu}}$  with the same amplitude. By combining the  
195 analysis of these two amino acids, it becomes possible to determine the trophic position of an  
196 organism while effectively eliminating interference from the baseline effect<sup>34</sup>.

197 The analysis of  $\delta^{15}\text{N}$  on these two amino acids provides an internal trophic position (TP)  
198 indicator which can be calculated by employing the following equation<sup>34</sup>:

$$\text{TP}(\text{C3}) = [(\Delta^{15}\text{N}_{\text{Glu-Phe}} + 8.4)/7.6] + 1$$

200

201

### 202 ***2.1.2.2 Carbon isotope ratios on amino acids and exploited environment***

203

204 Previous studies<sup>35,36</sup> demonstrated the potential of carbon isotope analyses on the Phe and the  
205 valine (Val) to distinguish between 4 main dietary groups (Marine fish consumers; freshwater fish  
206 consumers, terrestrial C<sub>3</sub> protein consumers, terrestrial C<sub>4</sub> protein consumers). Generally,  
207 terrestrial C<sub>3</sub> protein consumers have similar  $\delta^{13}\text{C}_{\text{Phe}}$  and  $\delta^{13}\text{C}_{\text{Val}}$  values in collagen. The terrestrial  
208 C<sub>4</sub> protein consumers would also exhibit similar  $\delta^{13}\text{C}_{\text{Phe}}$  and  $\delta^{13}\text{C}_{\text{Val}}$  values but relatively higher.  
209 The  $\delta^{13}\text{C}_{\text{Val}}$  values of freshwater fish consumers overlap with the terrestrial C<sub>3</sub> protein consumers  
210 but have a lower  $\delta^{13}\text{C}_{\text{Phe}}$ . The  $\delta^{13}\text{C}_{\text{Val}}$  of marine protein consumers overlap with the terrestrial C<sub>4</sub>  
211 protein consumers but have lower  $\delta^{13}\text{C}_{\text{Phe}}$  values<sup>35,36</sup>.

## 212 **2.2 Zinc isotope ratios: a dietary proxy retrieved from dental enamel**

213 Dental enamel is more resistant to time degradation than bone, therefore, dietary investigations of  
214 the new metal isotope trophic proxies in the mineral hydroxyapatite  $\text{Ca}_{10}(\text{PO}_4)_6(\text{OH})_2$  have gained  
215 increased attention in recent years<sup>37-42</sup>. The Zn isotopic composition of vertebrate tissues appears  
216 to be strongly related to diet<sup>38,43-46</sup> and can be analysed in dental enamel(oid), a tissue very resistant  
217 to diagenesis<sup>37-39,43,47</sup>.

218 The variability of the  $^{66}\text{Zn}/^{64}\text{Zn}$  ratio (expressed as  $\delta^{66}\text{Zn}$  value) in vertebrate consumer is caused  
219 by two main factors. The Zn isotope composition from the source of intake and the Zn isotope  
220 fractionation within the organism. In the food web, the Zn isotope composition of primary  
221 producers, like plants, comes from the underlying bedrock further fractionated within the plants  
222 tissues. However, bedrock  $\delta^{66}\text{Zn}$  values of this latter can exhibit some variations depending on

223 their composition<sup>38,48</sup>. For instance, marine carbonates (+0.3 to +1.4‰) can display higher and  
224 much more varied values than most clastic and volcanic rocks (+0.3±0.14‰ [2σ]) and other  
225 sedimentary rocks<sup>49-51</sup>.

226 Previous work on bioapatite  $\delta^{66}\text{Zn}$  values have shown a  $^{66}\text{Zn}$  enrichment in herbivore's  
227 enamel bioapatite relative to that of carnivores. This is because zinc isotope compositions become  
228 relatively depleted in heavy isotopes with successive trophic levels<sup>44</sup>. Therefore, herbivores have  
229 systematically higher  $\delta^{66}\text{Zn}$  values than carnivores ( $\delta^{66}\text{Zn}_{\text{herbivore}} > \delta^{66}\text{Zn}_{\text{carnivore}}$ ), which is consistent  
230 with previous findings demonstrating a decrease of approximately 0.30 to 0.60‰ in  $\delta^{66}\text{Zn}$  values  
231 with each step in archaeological and modern food webs<sup>38,46,52,53</sup>.

232 The trophic fractionation of  $\delta^{66}\text{Zn}$  is a result of Zn isotope fractionation within an  
233 organism<sup>54-57</sup>. The body muscles are usually depleted in heavy Zn isotopes compared to the diet  
234 and bioapatite tissues<sup>54,56</sup>. Thus carnivores, which consume exclusively meat, are expected to  
235 exhibit lower bioapatite zinc isotope ratios compared to those of their prey. Because bones are  
236 enriched in heavy Zn isotopes compared to muscles, bone consumers like hyena usually exhibit a  
237 different isotopic composition than sympatric carnivores feeding exclusively on meat<sup>46</sup>. Zinc  
238 isotope fractionation also occurs in plants resulting in a different isotopic composition among  
239 roots, stems and leaves<sup>58,59</sup>. This isotopic variation within a plant may affect the entire trophic web.  
240 Some Zn studies showed that faunal species feeding on leaves ("browsers") have different  $\delta^{66}\text{Zn}$   
241 values than those feeding on grass ("grazers")<sup>45,46</sup>. Leaves are usually  $^{64}\text{Zn}$ -enriched compared to  
242 the other parts of the plants. Consequently, browsers exhibit lower Zn isotopic ratios than  
243 grazers<sup>46,59</sup>. However, this browser-grazer  $\delta^{66}\text{Zn}$  variability may not be ubiquitous, as it has not  
244 been observed in South East Asian tropical food webs<sup>38,43</sup>.

245 One study documented the impact of breastfeeding on  $\delta^{66}\text{Zn}_{\text{enamel}}$  values with teeth formed  
246 during breastfeeding having higher values than post-weaning formed enamel<sup>48</sup>.

247 In summary, meat consumption is associated with low  $\delta^{66}\text{Zn}$  values – especially when combined  
248 with elevated  $\delta^{15}\text{N}$  values in bone collagen. In contrast to N, Zn becomes relatively depleted in  
249 heavy isotopes with successive trophic levels. However, both N and Zn show higher isotope ratios  
250 in tissues of breastfed children relative to their nurturer<sup>48,60</sup>.

### 2.3 Strontium isotope ratios: a mobility proxy retrieved from dental enamel

Strontium, a trace element, consists of four naturally occurring isotopes, including three stable ones:  $^{84}\text{Sr}$ ,  $^{86}\text{Sr}$ , and  $^{88}\text{Sr}$ . The fourth isotope,  $^{87}\text{Sr}$ , is radiogenic and is produced through the radioactive decay of rubidium, specifically  $^{87}\text{Rb}$ , which has a half-life of approximately  $4.7 \times 10^{10}$  years. The natural abundances of these isotopes are as follows:  $^{84}\text{Sr}$  (0.56%),  $^{86}\text{Sr}$  (9.879%),  $^{88}\text{Sr}$  (82.53%), and  $^{87}\text{Sr}$  (7.04%). The amount of radiogenic  $^{87}\text{Sr}$  in geological formation depends on factors like rock age and the  $^{87}\text{Rb}/^{87}\text{Sr}$  ratio, causing variations in the  $^{87}\text{Rb}/^{87}\text{Sr}$  ratio in bedrock based on rock age and lithology<sup>61,62</sup>.

The isotopic composition of strontium is expressed as the ratio of  $^{87}\text{Sr}/^{86}\text{Sr}$ . Generally, the  $^{87}\text{Sr}/^{86}\text{Sr}$  ratio of the continental crust varies between 0.700-0.750<sup>62</sup>. Rocks with expected high original  $^{87}\text{Rb}/^{87}\text{Sr}$  ratio will exhibit a higher  $^{87}\text{Sr}/^{86}\text{Sr}$  ratio, usually above 0.710. This often includes lithologies such as granite and gneiss. Lithologies with low  $^{87}\text{Rb}/^{87}\text{Sr}$  usually have low  $^{87}\text{Sr}/^{86}\text{Sr}$  ratio (0.706) often even lower in basalts (0.704)<sup>61</sup>. On the other hand, unaltered marine limestones and dolomites exhibit an intermediate Sr signature (0.707-0.709) recording the isotopic composition of the seawater at the time of carbonate mineral precipitation. Although the isotopic variations seem small, they are large compared to the instrumental error of modern mass spectrometers ( $\pm 0.00001$ )<sup>61</sup>.

Strontium is chemically and structurally similar to calcium. Consequentially, Sr substitutes for Ca in carbonate minerals such as calcite, aragonite and dolomite, as well as in bioapatite<sup>63</sup>. Strontium is released from rocks by weathering and incorporated into the soil, ground water and stream, which will be taken up by primarily producers and then passed on through the food web. The fractionation of  $^{87}\text{Sr}/^{86}\text{Sr}$  is small due to its large isotopic mass and invisible due to the normalization performed during Sr isotope analyses<sup>61</sup>. Therefore, the Sr signature within an organism reflects that of local geology. For humans and other animals, strontium is incorporated into their skeleton via diet. Thus, bioapatite  $^{87}\text{Sr}/^{86}\text{Sr}$  ratios serve as a tracer for the location of an individual's dietary resources.

### 2.4 Sulphur isotope ratios: a mobility proxy retrieved from bone and tooth collagen

Sulphur (S) isotope analysis is a complementary method to C and N isotope analyses, a tool for gaining insights into mobility and the consumption of marine foods<sup>64,65</sup>.

281 On earth, there are three main reservoirs for S: Oceanic dissolved sulphates, evaporitic sulphates  
282 and pyrite<sup>65</sup>. Sulphur analysis is primarily based on the variations in  $\delta^{34}\text{S}$  values observed across  
283 different ecosystems, such as marine, freshwater, and terrestrial environments. These variations  
284 serve as a fundamental principle for studying sulphur isotopes. In marine ecosystems, the  $\delta^{34}\text{S}$   
285 values are close to +20‰, the value of the oceanic sulphates<sup>66</sup>. Individuals living close to coastal  
286 regions display  $\delta^{34}\text{S}$  values close to +20‰ due to the “sea spray effect”. Terrestrial plants,  
287 representing the base of a trophic chain receive their S through soil minerals or from aerosols. The  
288 aerosols are the main sources of sulphur for plants living close to coastal regions<sup>67</sup>.

289 Meanwhile, terrestrial  $\delta^{34}\text{S}$  values vary from ca. -20‰ to +20‰ and depending on the S of the  
290 local bedrock<sup>65,68</sup>. Sulphur is released from rocks by weathering and incorporated into the soil,  
291 which will be taken up by primarily producers and then passed on through the food web. For  
292 instance, low  $\delta^{34}\text{S}$  values are found in sedimentary sulphides and igneous minerals, while the  
293 values largely increase in geological sulphates<sup>67</sup>.

294 The plants are depleted by 1.5‰ to their sources of sulphates<sup>69</sup>. A small number of publications  
295 shows that the isotopic fractionation between diet and consumers tissues, is likely small to  
296 negligible<sup>65</sup>. Therefore, the  $\delta^{34}\text{S}$  values reflect the local ecosystem of the individual<sup>70</sup>. Combined  
297  $\delta^{34}\text{S}$  with  $\delta^{13}\text{C}$  and  $\delta^{15}\text{N}$  values enables the detection of seafood consumption<sup>69-72</sup>.

298

## 299 3 Supplementary Information 3: Material and Methods

300

### 301 **3.1 Faunal samples**

302 Archaeological samples included in this study originated from the Taforalt archaeological site in  
303 Morocco, and the necessary permits for exporting and sampling human and faunal specimens  
304 were obtained from the Institut National des Sciences de l'Archéologie et du Patrimoine (INSAP)  
305 in Rabat, Morocco, under permit N°02/2019-2020-232. The analyses were conducted at the Max  
306 Planck Institute for Evolutionary Anthropology in Leipzig.

#### 307 3.1.1 Faunal species identification

308 Only a small number of carnivore remains were available at the site (NISP= 9, Supplementary  
309 Table 1) and we sampled all teeth available for the isotopic analysis (n=2). However, these  
310 carnivores might not have a pure carnivorous diet, since many canid species can feed on a variable  
311 amount of plants<sup>73</sup>.

312 One carnivore (SEVA 35834, Supplementary Table 2) was identified by ZooMS as a Canidae  
313 (although the identification and combination of peptide markers for this sample exclude the  
314 possibility of a red fox (*Vulpes vulpes*, Supplementary Table 2). This means that this specimen  
315 more likely belongs to the Caninae subfamily. Another carnivore (SEVA 35828) was identified  
316 using traditional zooarchaeology as a red fox (*Vulpes vulpes*)<sup>11</sup>.

317 The Barbary sheep samples were initially identified using traditional zooarchaeological methods.  
318 Of the samples, three were subsequently confirmed as Caprinae through ZooMS analysis, which  
319 aligns with the initial zooarchaeological identification.

320 ZooMS analysis corroborated the zooarchaeological identification of equids, hartebeest,  
321 Rhinoceros, and gazelle. Moreover, it provided a more specific identification for a bovid, which  
322 was determined to be a hartebeest. However, one Barbary sheep sample and hare proved  
323 unidentifiable through ZooMS analysis. Consequently, we retained the initial zooarchaeological  
324 identification for these specimens in our study (Supplementary Table 2). Among the herbivore  
325 taxa, most of them are expected to be grazers but Barbary sheep and gazelles can be mixed-  
326 feeders<sup>74,75</sup>. Gazelles, hartebeest and Barbary sheep are also drought tolerant<sup>76-78</sup>.

327



329

330

331

**Supplementary Table 2:** The morphological and ZooMS taxonomic identification of the faunal remains included in this study. SEVA numbers are the identification numbers given to each sample processed and analysed at the Max Planck Institute for Evolutionary Anthropology.

| ID             | Sector    | SEVA  | Zooarchaeological identification | Tissue type | ZooMS           | Final identification | Latin name                   |
|----------------|-----------|-------|----------------------------------|-------------|-----------------|----------------------|------------------------------|
| TAF 10-11408   |           | 34565 | Equus                            | M           |                 | Equus                | <i>Equidae</i>               |
| TAF 05-3475    | sector 10 | 34566 | Barbary sheep                    | M           |                 | Barbary sheep        | <i>Ammotragus lervia</i>     |
| TAF.13-12280   | sector 10 | 35819 | Barbary sheep                    | M3          | Unidentifiable  | Barbary sheep        | <i>Ammotragus lervia</i>     |
| TAF.04-379     | sector 8  | 35820 | Equus                            | M1/2        | Equidae         | Equus                | <i>Equidae</i>               |
| TAF.13-11819   | sector 10 | 35821 | Barbary sheep                    | dm3         | Caprinae (Ovis) | Barbary sheep        | <i>Ammotragus lervia</i>     |
| TAF.13-11617   | sector 10 | 35822 | Equus                            | I           | Equidae         | Equus                | <i>Equidae</i>               |
| TAF 05-2907    | sector 10 | 35823 | Hare                             | bone        | Unidentifiable  | Hare                 | <i>Lepus</i>                 |
| TAF-1807       |           | 35824 | Bovid                            | M3          | Alcelaphinae    | Hartebeest           | <i>Alcelaphus buselaphus</i> |
| TAF.04-2188    |           | 35825 | Equus                            | M3          | Equidae         | Equus                | <i>Equidae</i>               |
| TAF 13 - 12127 | sector 10 | 35826 | Equus                            | dp          | Equidae         | Equus                | <i>Equidae</i>               |
| TAF 08-F23     | sector 4  | 35827 | Alcelaphus                       | M2          | Alcelaphinae    | Hartebeest           | <i>Alcelaphus buselaphus</i> |



|              |           |       |               |        |                                                           |               |                          |
|--------------|-----------|-------|---------------|--------|-----------------------------------------------------------|---------------|--------------------------|
| TAF 05-2498  | sector 10 | 35828 | Fox           | M1     | Unidentifiable                                            | Fox           | <i>Vulpes vulpes</i>     |
| TAF 05-2649  | sector 10 | 35829 | Gazelle       | M3     | Bovidae (not Bovinae or Caprinae) / Cervinae / Giraffidae | Gazelle       | <i>Gazella sp.</i>       |
| TAF 13-11933 | sector 10 | 35830 | Barbary sheep | I      | Caprinae (Ovis)                                           | Barbary sheep | <i>Ammotragus lervia</i> |
| TAF 13-11757 | sector 10 | 35831 | Barbary sheep | M2     | Caprinae (Ovis)                                           | Barbary sheep | <i>Ammotragus lervia</i> |
| TAF 13-11660 | sector 10 | 35832 | Gazelle       | P2/P3  |                                                           | Gazelle       | <i>Gazella sp.</i>       |
| TAF 05-2450  | sector 10 | 35833 | Gazelle       | P      | Antilopinae                                               | Gazelle       | <i>Gazella sp.</i>       |
| TAF 10-11226 | sector 10 | 35834 | Canid         | M      | Canidae (not red fox)                                     | Canid         | <i>Canidae</i>           |
| TAF 04-1842  | sector 8  | 35835 | Gazelle       | P2     |                                                           | Gazelle       | <i>Gazella sp.</i>       |
| TAF 04-375   | sector 8  | 35836 | Rhinoceros    | P or M | Rhinocerotidae                                            | Rhinoceros    | <i>Rhinocerotidae</i>    |

### 3.2 Human material and tooth pathologies

333 The human samples consisted of 23 teeth and seven bones. Most of the samples belong to 7  
334 individuals buried in sector 10<sup>5</sup>. The other samples were isolated and are therefore described as  
335 “unassigned” (Supplementary Table 3). The human teeth were scanned using a micro-CT scanner  
336 in the Department of Human Evolution at MPI-EVA (Leipzig, Germany). The teeth were scanned  
337 and revealed an important amount of hypoplasia (78% of our samples; n=23) and caries (13% of  
338 our samples; n=23). All 3D scans are not available online but are shared by the authors after  
339 request. The location of the caries and hypoplasia are documented in the Supplementary  
340 Information 7 and are summarized in Supplementary Table 4. Areas sampled for Sr and Zn isotope  
341 measurement are also shown in Supplementary Information 7 (Teeth scans).

342 The sampling strategy is described in detail in section 3.3.1.1, titled "Strategy of Tooth Sampling".  
343 The approximate areas that were sampled in the vertical plane are represented by arrows on the  
344 tooth scans (Supplementary Information 7). However, it is crucial to note that these arrows provide  
345 a general indication of the sampled regions and do not accurately represent the depth or width of  
346 the sampled areas.  
347

348 In this study, our analysis of dental remains has revealed a presence of dentine and enamel stress  
349 in the teeth, as indicated in Supplementary Information 4. This finding suggests that periods of  
350 tooth formation were marked by disruptions, which can be associated with various stressors  
351 experienced during different stages of life<sup>79,80</sup>. In other studies, linear enamel hypoplasia, is  
352 typically observed in teeth formed early in life, such as incisors and canines, which coincides with  
353 the weaning process<sup>66,67</sup>. Weaning, occurring between 2-5 years of age in hunter-gatherer societies,  
354 is often regarded as a period of significant stress for infants<sup>79,81</sup>.

355 However, our investigation has unveiled a more nuanced picture. Notably, hypoplasia is not  
356 present solely in teeth formed during the weaning period. We find its presence in teeth that form  
357 after weaning, including the M2 and M3 molars. This raises the possibility that factors beyond  
358 weaning, such as persistent nutritional stress or traumatic events, may also contribute to the  
359 formation of these stress markers. Other influential elements could include genetic predisposition,  
360 environmental influences, or psychological stress<sup>82</sup>. Compared to the Natufian population, the  
361 Iberomaurusians from Taforalt exhibit a much higher frequency of caries<sup>4,83</sup>. The presence of  
362 enamel hypoplasia has been attested in Natufian sites like Nahal Oren in the Levant, mainly

363 between the age of 3-7yrs<sup>83</sup>. However, we could not establish the frequency of this stress between  
 364 Natufians and our samples due to our limited sample size.

365 **Supplementary Table 3:** The human samples from the sector 10 of Taforalt. analyzed in this study with their sex and  
 366 age of death estimation (from Humphrey et al., 2020)<sup>5</sup>. SEVA are the identification numbers used at the Max Planck  
 367 Institute for Evolutionary Anthropology. The ID are the identification numbers given to the finds during the  
 368 excavations. ND stands for Not Determined. Mo stands for months.

| <b>Individual</b> | <b>SEVA</b> | <b>ID</b>   | <b>Element</b> | <b>Sex</b> | <b>Age at death</b> |
|-------------------|-------------|-------------|----------------|------------|---------------------|
| 1                 | 35961       | TAF_06_3966 | M2             | male       | 20yrs               |
| 1                 | 35962       | TAF_06_4164 | M2             | male       | 20yrs               |
| 1                 | 35967       | TAF_06_3966 | I2             | male       | 20yrs               |
| 1                 | 35970       | TAF_06_3967 | M              | male       | 20yrs               |
| 1                 | 35979       | TAF_06_4167 | P4             | male       | 20yrs               |
| 1                 | 35985       | TAF_06_H576 | bone           | male       | 20yrs               |
| 1                 | 35963.A     | TAF_06_4164 | C              | male       | 20yrs               |
| 1                 | 35963.B     | TAF_06_4164 | M2             | male       | 20yrs               |
| 2                 | 35981       | TAF_05_3281 | bone           | ND         | ND                  |
| 5                 | 35977       | TAF_08_6875 | M2             | female     | 16-18yrs            |
| 5                 | 35978       | TAF_08_6875 | C              | female     | 16-18yrs            |
| 5                 | 35971.A     | TAF_08_6880 | I1             | female     | 16-18yrs            |
| 5                 | 35971.B     | TAF_08_6880 | M1             | female     | 16-18yrs            |
| 6                 | 35964       | TAF_06_4753 | dm2            | male       | 6-12mo              |
| 6                 | 35965       | TAF_06_4753 | di1            | male       | 6-12mo              |
| 6                 | 35982       | TAF_08_5883 | bone           | male       | 6-12mo              |
| 6                 | 35983       | TAF_08_5753 | bone           | male       | 6-12mo              |
| 9                 | 35966       | TAF_09_8111 | di1            | female     | 5-6mo               |
| 9                 | 35966       | TAF_09_8111 | bone           | female     | 5-6mo               |
| 13                | 35975       | TAF_13_1000 | M3             | male       | 18-20yrs            |
| 13                | 35975       | TAF_13_1000 | bone           | male       | 18-20yrs            |

|            |       |                  |      |      |          |
|------------|-------|------------------|------|------|----------|
| 14         | 35980 | TAF_10_1010<br>5 | P4   | male | 18-20yrs |
| unassigned | 35959 | TAF_05_2882      | bone | ND   | ND       |
| unassigned | 35959 | TAF_05_2882      | I    | ND   | ND       |
| unassigned | 35960 | TAF_05_3380      | I2   | ND   | ND       |
| unassigned | 35968 | TAF_04_1031      | M3   | ND   | ND       |
| unassigned | 35969 | TAF_05_3685      | I2   | ND   | ND       |
| unassigned | 35972 | TAF_06_4224      | P3   | ND   | ND       |
| unassigned | 35973 | TAF_05_3144      | I2   | ND   | ND       |
| unassigned | 35974 | TAF_06_3907      | M3   | ND   | ND       |
| unassigned | 35976 | TAF_05_3613      | M    | ND   | ND       |
| unassigned | 34561 | TAF_10_1102<br>5 | I1   | ND   | ND       |

369  
370  
371

372 **Supplementary Table 4:** Caries and hypoplasia presence in the human teeth from Taforalt included in this study. Hypoplasia are detected on the CT scans (3D  
 373 models and 2D virtual sections in Supplementary 7). We utilized the positioning of hypoplasia within the teeth in relation to the tooth's developmental timeline<sup>84</sup>  
 374 to make an approximate estimation of its occurrence period

| <b>Individual</b> | <b>sex</b> | <b>age of death</b> | <b>SEVA</b> | <b>tooth</b> | <b>presence of caries</b> | <b>presence of hypoplasia</b> | <b>location</b> | <b>period of hypoplasia/ stress</b>                   |
|-------------------|------------|---------------------|-------------|--------------|---------------------------|-------------------------------|-----------------|-------------------------------------------------------|
| 1                 | male       | 20yrs               | 35963.<br>B | LLM2         | yes                       | yes                           | complete tooth  | 3-16yrs                                               |
|                   |            |                     | 35961       | ULM2         | no                        | yes                           | complete tooth  | 3.5-16yrs                                             |
|                   |            |                     | 35963.<br>A | LLC          | no                        | yes                           | complete tooth  | 4-14yrs                                               |
|                   |            |                     | 35962       | LLM2         | yes                       | yes                           | root            | 7-15yrs                                               |
|                   |            |                     | 35970       | UxM          | no                        | yes                           | crown           | ?                                                     |
|                   |            |                     | 35967       | LRI2         | no                        | yes                           | complete tooth  | 3-10yrs                                               |
| 5                 | female     | 16-18yrs            | 35971.<br>A | LLI1         | no                        | yes                           | complete tooth  | small hypoplasia around 3yrs and again at around 5yrs |
|                   |            |                     | 35971.<br>B | LRM1         | no                        | yes                           | crown enamel    | between 2.5 and 5yrs                                  |
|                   |            |                     | 35978       | ULC          | no                        | no                            | crown           | light EH around 3.5yrs                                |
| 6                 | male       | 6-12mo              | 35965       | URdi1        | no                        | yes                           | root dentine    | 4.5-11mo                                              |
|                   |            |                     | 35964       | URdm2        | no                        | no                            |                 |                                                       |

|                |            |              |       |      |     |     |                   |                                                         |
|----------------|------------|--------------|-------|------|-----|-----|-------------------|---------------------------------------------------------|
| 9              | femal<br>e | 5-6mo        | 35966 | ULM2 | no  | no  |                   |                                                         |
| 13             | male       | 18-<br>20mo  | 35975 | LRM3 | no  | yes | crown<br>enamel   | around 13-14yrs                                         |
| 14             | male       | 18-<br>20yrs | 35980 | LRP4 | no  | yes | complete<br>tooth | 4-10yrs                                                 |
| unassigne<br>d |            |              | 35959 | LxI  | no  | yes | root              | 3-11yrs                                                 |
| unassigne<br>d |            |              | 35960 | III2 | no  | yes | complete<br>tooth | strong EH 3-5yrs + slight stress<br>between 5 and 10yrs |
| unassigne<br>d |            |              | 35968 | ULM3 | no  | yes | complete<br>tooth | 14-16yrs                                                |
| unassigne<br>d |            |              | 35969 | LRI2 | no  | yes | root              | 7-10yrs                                                 |
| unassigne<br>d |            |              | 35972 | LLP3 | no  | yes | root              | 6-10yrs                                                 |
| unassigne<br>d |            |              | 35973 | LRI2 | no  | no  |                   |                                                         |
| unassigne<br>d |            |              | 35974 | ULM3 | yes | yes | crown and<br>root | 12 yrs-                                                 |
| unassigne<br>d |            |              | 35976 | LRM  | no  | yes | crown and<br>root | ?                                                       |
| unassigne<br>d |            |              | 34561 | UII  |     |     |                   |                                                         |

376

377 **3.3 Methods of isotope analyses**

378 The isotopic analyses were conducted in the Max Planck Institute for Evolutionary Anthropology,  
379 Leipzig, Germany.

380 3.3.1 Human Teeth Sampling Approach

381 **3.3.1.1 *Estimation of the period of teeth formation***

382 To estimate the age of the individual at the time when the teeth was formed, we referred to  
383 AlQahtani, 2010<sup>84</sup>. This reference provided valuable information for determining the timing of  
384 tooth development. More specific details are found in the accompanying Excel document  
385 (Supplementary table 16). It is important to note that the formation of a tooth occurs over an  
386 extended period, for instance, I2 mineralizes between 1 and 10yrs. To account for this variability,  
387 we categorized the sampled tooth parts into groups with distinct period of formation groups  
388 (Supplementary table 16, Excel document):

- 389 - Placental Formation: This category includes tooth parts formed before birth, such as the  
390 upper part of the crown of dm2 and di1.
- 391 - Pre-Weaning Formation: Tooth parts formed during the first four years of life fall into this  
392 category.
- 393 - Post-Weaning Formation: Any tooth parts formed after four years are considered post-  
394 weaning.

395 Following this categorization, we exclusively considered values from tooth parts formed post-  
396 weaning as representative of the adult diet since hunter gatherers are weaned on average around 4  
397 years<sup>81</sup>.

398

399

400 3.3.2 Faunal Teeth Sampling Approach

401 **3.3.2.1 Estimation of the period of teeth formation**

402 Determining the age of mineralization in fauna can be challenging due to limited data availability.  
403 However, we based our estimations on existing information for specific species (Supplementary  
404 table 17, Excel document):

405 **Caprids** (e.g., Barbary sheep): M2 mineralizes between 8 and 18 months, while M3 mineralizes  
406 between 19-36 months. Caprids are typically weaned around 4 months, which means that these  
407 two teeth (M2 and M3) are not influenced by nursing<sup>85</sup>. However, it's worth noting that the enamel  
408 of incisors can be impacted by nursing.

409 **Equids:** Equids are typically weaned between 9-15 months<sup>86</sup>. The P2, P3, P4, and M3 mineralize  
410 after weaning, while M2 partially mineralizes before weaning. The deciduous premolars (dp) of  
411 Equids are unlikely to be affected by nursing, as they begin calcifying before birth and are fully  
412 calcified shortly after birth.

413 **Bovids:** Bovids are generally weaned between 6-8 months. The M1 mineralizes before weaning,  
414 whereas the M2 and M3 mineralize after weaning. The premolars also mineralize after weaning<sup>87</sup>.

415 **Carnivores:** Carnivores are usually weaned at an earlier age. For example, foxes are weaned  
416 around 41 days, but in the case of the enamel on M1, it might be affected by nursing signals<sup>88</sup>.  
417 However, the root of M1 is formed post-weaning. We could not determine the exact species of the  
418 other canid but the pattern of weaning is likely to be similar.

419 **3.3.2.2 Fauna teeth sampling**



420

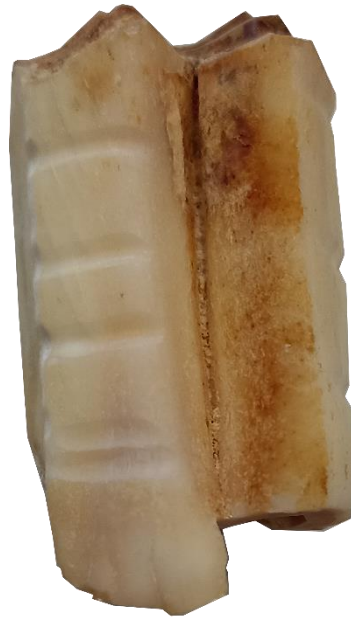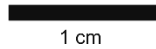

421

422 **Supplementary Figure 2:** An example of sampling strategy for Zn isotope analyses on a herbivore tooth

423

424 4 Supplementary Information 4. Results

425

426 **4.1 Zinc isotopic results**

427 4.1.1 Data quality

428 The zinc analyses incorporated two reference materials, SRM 1400 and SRM 1486, which were  
429 prepared and subsequently analyzed alongside the samples. The obtained values fell within the  
430 established range of previous findings documented in the literature (Supplementary Table 5).

431 Zinc was extracted from the tooth enamel of human and faunal remains which is generally more  
432 resistant to diagenetic alteration<sup>47,89</sup>. Zinc isotope ratios correlation between concentrations in  
433 tooth enamel is used to test the good preservation of dietary biogenic  $\delta^{66}\text{Zn}$  values<sup>90</sup>. There is a  
434 slight correlation between the Zn isotope ratios and the concentrations (1/conc) in our samples (p-  
435 value  $\leq 0.001$ ) (Supplementary Figure 3), however, this correlation is likely of dietary origin: the  
436 human enamel has systematically higher Zn concentration than that of the fauna and, since most  
437 of our samples consist of herbivores which usually have lower Zn concentrations, a correlation  
438 between  $\delta^{66}\text{Zn}$  and concentrations appears (Supplementary Figure 3). There is no correlation  
439 between the Zn concentration and  $\delta^{66}\text{Zn}$  values if we consider human and fauna elements  
440 separately (Supplementary Figure 3), which argues for the good preservation of the biogenic zinc  
441 isotope ratios.

442

443 **Supplementary Table 5:** Zinc isotope ratios of reference materials from this study and literature data.

|          | This study             |      |   | Literature data        |      |                   |
|----------|------------------------|------|---|------------------------|------|-------------------|
|          | $\delta^{66}\text{Zn}$ | SD   | n | $\delta^{66}\text{Zn}$ | SD   | References        |
| SRM 1400 | 0.93                   | 0.03 | 5 | 0.96                   | 0.02 | 39 38,43,45,48,52 |
| SRM 1486 | 1.23                   | 0.04 | 2 | 1.2                    | 0.04 | 52,53             |

444

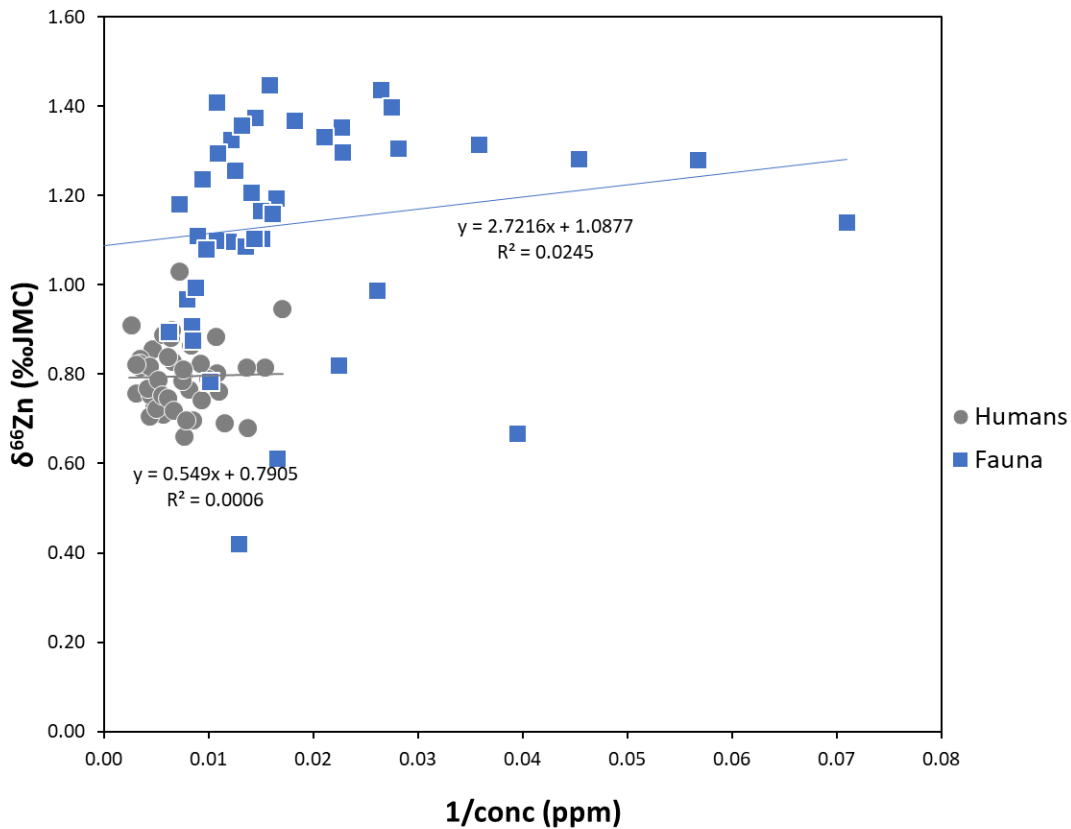

445

446 **Supplementary Figure 3:** Relationship between the Zn isotope ratios and Zn concentrations in enamel of fossil  
 447 teeth from Taforalt, Morocco.

448 4.1.2 Description of the Zn isotope ratios of Taforalt fauna and animal teeth

449

450 The  $\delta^{66}\text{Zn}_{\text{enamel}}$  values of the fauna from Taforalt ranges from 0.42 to 1.45‰ which is comparable  
 451 with the range observed in the modern food web of Koobi Fora (Kenya) and Gabasa (Spain)<sup>39,46</sup>.

452 When considering only the teeth formed post-weaning in herbivores, they exhibit the highest  
 453  $\delta^{66}\text{Zn}_{\text{enamel}}$  values in the food web at Taforalt ( $1.12 \pm 0.07\%$ ,  $n_{\text{samples}}=20$ ). The carnivores (a fox and  
 454 a canid), on average, show lower values ( $0.52 \pm 0.14\%$ ,  $n=2$ ) (Figure 3). While the  $\delta^{66}\text{Zn}_{\text{enamel}}$   
 455 value of the M1 enamel sampled from the fox may be influenced by the nursing signal (0.61‰),  
 456 the canid's molar exhibits a lower  $\delta^{66}\text{Zn}$  value (0.42‰) and is less likely to be affected by nursing<sup>48</sup>.

457 While our preliminary data suggests differences in  $\delta^{66}\text{Zn}_{\text{enamel}}$  values between dietary groups  
 458 (herbivores and canids) (Extended Data Figure. 1), it is important to note that our sample size is  
 459 limited for the carnivores and that they might not have been purely carnivorous and occasionally

460 included plants into their diet<sup>73</sup>. However,  $\delta^{66}\text{Zn}_{\text{enamel}}$  values for the carnivores at Taforalt are still  
461 lower than values observed in other food webs, even lower than wolf<sup>39</sup> which is usually considered  
462 a pure carnivore<sup>73</sup>. The trophic level spacing  $\Delta^{66}\text{Zn}_{\text{herbivores-canids}}$  would be 0.60‰ and can be 0.70‰  
463 if we exclude the M1 of the fox. Although based only on two carnivores, the trophic spacing at  
464 Taforalt fits with ranges observed in other food webs<sup>38,46,52</sup>. The humans from Taforalt have  
465 elevated  $\delta^{66}\text{Zn}_{\text{enamel}}$  values ( $0.78 \pm 0.07\text{‰}$ ,  $n_{\text{samples}}=28$ ) that are close to that of the herbivores from  
466 the same site. The offset between the adult humans and the herbivores is 0.34‰.

#### 467 **4.1.2.1 Zinc variability among herbivores**

468  
469 In Taforalt, we observe a pattern of  $\delta^{66}\text{Zn}_{\text{enamel}}$  between grazer and mixed feeder herbivores  
470 (Kruskal-Wallis chi-squared = 19.737, df = 1, p-value < 0.05) (Extended Data Figure.1). Grazers  
471 have the highest  $\delta^{66}\text{Zn}_{\text{enamel}}$  values ( $1.28\text{‰} \pm 0.15$ ,  $n=21$ ). The mixed feeders (i.e. Barbary sheep  
472 and gazelle) have lower  $\delta^{66}\text{Zn}$  values (Extended Data Figure.1). This pattern is similar to the one  
473 observed in the modern food web of Koobi Fora in the African Savannah<sup>46</sup>, and could be due to  
474 their consumption of leaves and fruits. The roots, shoots and all low growing plants are usually  
475 more enriched in heavy Zn isotopes, while tree leaves have lower  $\delta^{66}\text{Zn}_{\text{enamel}}$  values<sup>59,91</sup>.

#### 476 **4.1.2.2 Zinc isotopic variation among human individuals**

477  
478 The zinc isotope values do not vary significantly among the individuals analysed if we consider  
479 the average value of each individual (Kruskal-Wallis chi-squared = 5, df = 5, p-value = 0.4159).  
480 No discernible sex-related distinction was observed in the Taforalt population. The zinc isotope  
481 values, as illustrated in (Supplementary Figure 4), revealed no significant relationship with the sex  
482 of adult individuals (Kruskal-Wallis chi-squared = 0.49522, df = 1, p-value = 0.4816,  
483 Supplementary Table 6). This observation holds true for infants as well. It is important to note that  
484 the analysis of adult values exclusively includes teeth formed post-weaning, while those formed  
485 pre-weaning are categorized as part of the infant diet.

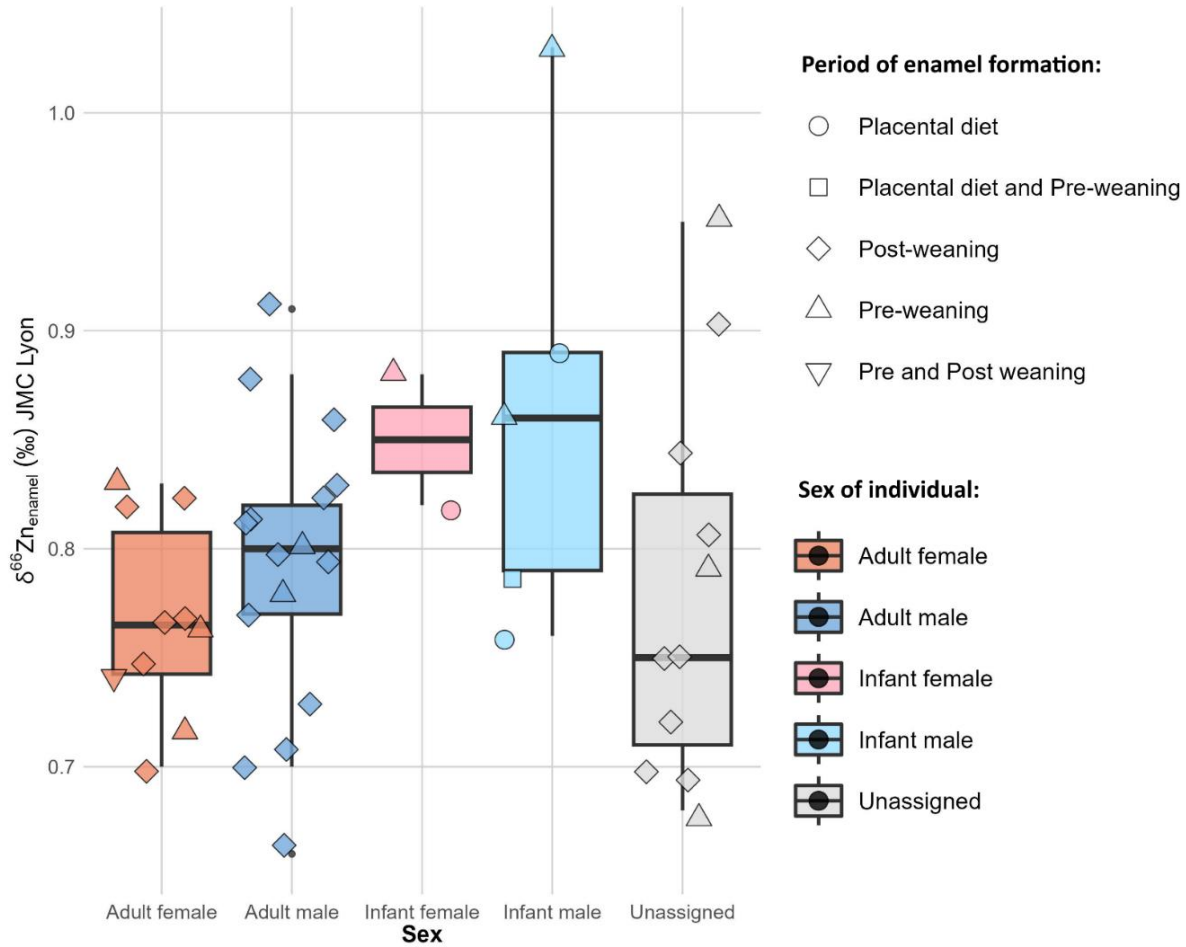

486

487 **Supplementary Figure 4:** Boxplot of zinc isotope values obtained from teeth enamel from male and female  
 488 samples in Taforalt ( $n_{\text{individual}}=17$ , 45 samples in total). Each point represents a single sampling from a tooth. Boxes  
 489 correspond to the median (centre line) and the first and third quartiles, while whiskers indicate the minimum and  
 490 maximum values.

491 **Supplementary Table 6:** Chi-squared and p-value of Kruskal Wallis tests comparing  $Zn_{\text{enamel}}$  isotope ratios with the  
 492 sex of the human samples from Taforalt.

| Age group               | $\chi^2$ | p value | p-value<0.05 |
|-------------------------|----------|---------|--------------|
| Biological sex (Adult)  | 0.49522  | 0.2652  | No           |
| Biological sex (Infant) | 0.42346  | 0.5152  | No           |

493

494

495 For some of the individuals, several teeth were sampled. In general, the variability between teeth  
 496 is quite small, within 0.1‰ of standard deviation. There are not enough teeth to conduct statistical

497 analyses. Individual 1 has mostly teeth formed after the introduction of solid food in the diet of a  
 498 child. Three M2 have been analysed, along with P4, C and I2, and the M2 exhibit the lowest and  
 499 highest ratios (Extended Data Figure.3). We do not see any weaning pattern for this individual.  
 500 Individual 5 show higher ratios in their I1 and M1 compared to M2 and C, but the values are very  
 501 similar. Individual 6 had only deciduous teeth, and the dm2 shows the highest ratios, which is  
 502 consistent with the hypothesis than exclusive breastfeeding triggers higher  $\delta^{66}\text{Zn}$  values than a  
 503 placental diet (recorded by di1).

## 504 4.2 Strontium isotopic results

### 505 4.2.1 Data quality

506 For strontium isotope ratios, our analysis involved the preparation and examination of the  
 507 standard SRM 1986 alongside the samples. The  $^{87}\text{Sr}/^{86}\text{Sr}_{\text{enamel}}$  values obtained from this standard  
 508 fall consistently within the established range of published values (Supplementary Table 7). The  
 509  $^{87}\text{Sr}/^{86}\text{Sr}_{\text{enamel}}$  and Sr concentration of our samples show no correlation, which suggests the  
 510 preservation of biogenic strontium isotope ratios (Supplementary Figure 5).

511 **Supplementary Table 7:** Strontium isotope ratios of reference materials from this study and literature data  
 512 38,39,43,45,46,48,92

|          | This study                      |       |   | Literature data                 |       |                                   |
|----------|---------------------------------|-------|---|---------------------------------|-------|-----------------------------------|
|          | $^{87}\text{Sr}/^{86}\text{Sr}$ | SD    | n | $^{87}\text{Sr}/^{86}\text{Sr}$ | SE    | References                        |
| SRM 1486 | 0.7093                          | 2E-05 | 7 | 0.7093                          | 3E-05 | Long term value at MPI-EVA, n=137 |

513

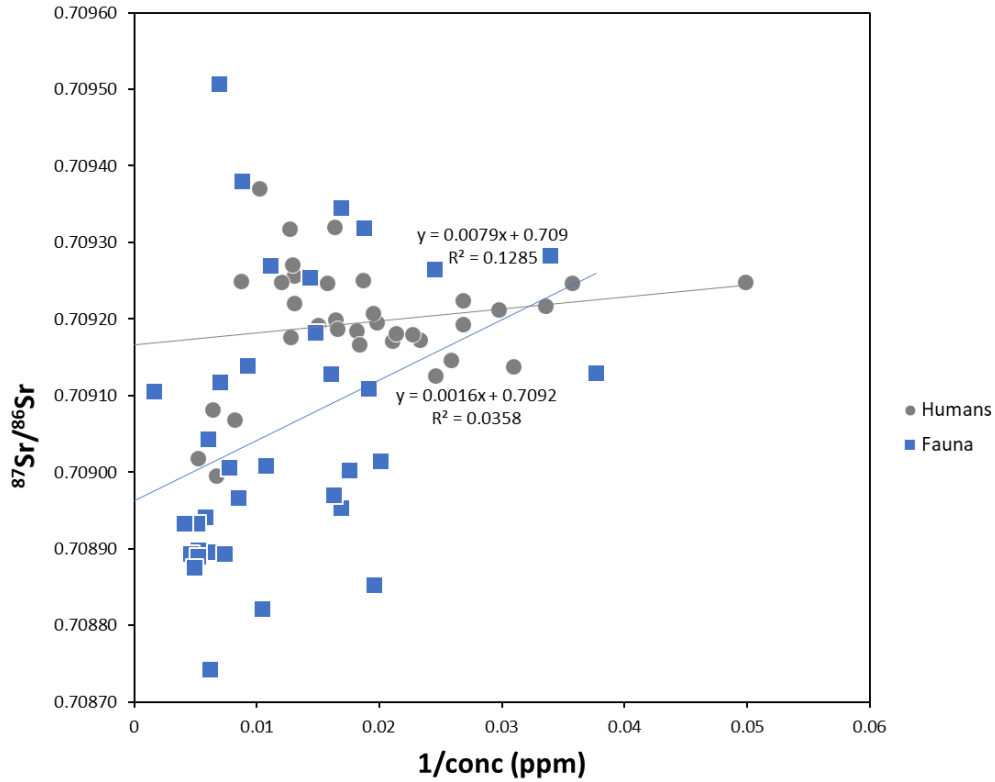

514  
 515 **Supplementary Figure 5:** Relationship between the Sr isotope ratio and Sr concentration in enamel of human  
 516 and fauna teeth from Taforalt, Morocco.

517

518 4.2.2 Strontium isotope data

519

520 The  $^{87}\text{Sr}/^{86}\text{Sr}_{\text{enamel}}$  of fauna and humans display a narrow range, from 0.7089 to 0.7093, and 0.7090  
 521 to 0.7094 respectively, compatible with what is expected for a coastal region (<100km) dominated  
 522 by a calcareous bedrock from Late Jurassic<sup>2,61,65,93</sup>. Among all the enamel samples analyzed in this  
 523 study, no correlation between the Zn isotope and Sr isotope ratio has been detected (Figure 2, Main  
 524 paper). This suggests that the Sr isotope composition in local geology is relatively homogenous  
 525 and has no influence on the Zn isotope ratios at Taforalt. All humans show  $^{87}\text{Sr}/^{86}\text{Sr}$  compatible  
 526 with that of the fauna, which is compatible with the hypothesis that they were all local individuals.

527

528 **4.3 Carbon and nitrogen results**

529 4.3.1 Data quality

530 Carbon and nitrogen stable isotopes were measured from bulk collagen. The weight percentage of  
 531 carbon (wt% C) and nitrogen (wt% N) in our samples range from 47.8 to 14.4% and 17.1 to 5.6%  
 532 respectively, and the C/N ratios fall within the acceptable range for ancient collagen extracts (3.0-  
 533 3.3)<sup>23,94</sup> (Supplementary table 16, Supplementary table 17 , Excel document). We thus exclude the  
 534 possibility of diagenetic alteration affecting our collagen isotope values<sup>94</sup>. The  $\delta^{13}\text{C}$  and  $\delta^{15}\text{N}$  of  
 535 the reference material that was analysed along with our samples fall within the range of accepted  
 536 values (Supplementary Table 8).

537 **Supplementary Table 8:** Carbon and nitrogen isotope ratios of reference materials from this study and the accepted  
 538 values (<https://nucleus.iaea.org/sites/ReferenceMaterials/Pages/Stable-Isotopes.aspx>)

|                               | Material         | This study                      |      |                                |      | Expected values                 |                                |
|-------------------------------|------------------|---------------------------------|------|--------------------------------|------|---------------------------------|--------------------------------|
|                               |                  | $\delta^{13}\text{C}$ (‰, VPDB) | SD   | $\delta^{15}\text{N}$ (‰, AIR) | SD   | $\delta^{13}\text{C}$ (‰, VPDB) | $\delta^{15}\text{N}$ (‰, AIR) |
| <b>IAEA N1<br/>CH6 (n=12)</b> | ammonium sulfate | -10.47                          | 0.3  | 0.43                           | 0.04 | $-10.449 \pm 0.03$              | $0.43 \pm 0.07$                |
| <b>IAEA N2<br/>CH7 (n=12)</b> | ammonium sulfate | -32.13                          | 0.04 | 20.35                          | 0.05 | $-32.151 \pm 0.05$              | $20.41 \pm 0.12$               |

539

540 4.3.2 Carbon and nitrogen isotope data

541 The  $\delta^{15}\text{N}_{\text{collagen}}$  values of the herbivores display a wide range of variation (5.5 to 11.7‰) and the  
 542  $\delta^{13}\text{C}_{\text{collagen}}$  values ranges from -20.91 to -18.06‰ (Figure 2, Main paper). Various factors could  
 543 influence this variation. Notably, nursing can raise herbivores  $\delta^{15}\text{N}_{\text{collagen}}$  levels, which is the case  
 544 for a deciduous tooth of a Barbary sheep ( $\delta^{15}\text{N}_{\text{collagen}} = 11.7‰$ ) and a deciduous tooth of an equid  
 545 ( $\delta^{15}\text{N}_{\text{collagen}} = 8.7‰$ ). After excluding potentially nursing-affected teeth, the values still span  
 546 between (5.5 to 11.6‰). One possible cause is the metabolic adaptation of certain species to  
 547 drought conditions, exemplified by the elevated  $\delta^{15}\text{N}_{\text{collagen}}$  values in the hartebeest species, known  
 548 for their ability to survive extended periods without water<sup>77</sup>. Additionally, variations in  $\delta^{15}\text{N}$   
 549 baseline values may play a role, as seen in Barbary sheep, which possess a flexible diet and may  
 550 consume plants with differing  $\delta^{15}\text{N}$  values; For the  $\delta^{15}\text{N}_{\text{collagen}}$ , the trophic level spacing between



551 carnivores and herbivores, considering only post-weaning tissues, is only of 2.8‰ which is in  
 552 lower than the common 3-5‰ trophic level increase<sup>29,95-97</sup>.

553 The  $\delta^{13}\text{C}_{\text{collagen}}$  and  $\delta^{15}\text{N}_{\text{collagen}}$  for adult humans (tissues formed post-weaning) are between -19.3  
 554 to -18.4‰ and 8.8 to 12.1‰ respectively. The  $\delta^{13}\text{C}_{\text{collagen}}$  and  $\delta^{15}\text{N}_{\text{collagen}}$  of the infant humans  
 555 (tissues formed pre-weaning) are between -18.8 to -18.6‰ and 12.3 to 13.5‰ respectively.  
 556 Contrary to Zn, there is an overlap between some herbivores, humans and carnivores (Figure 2  
 557 main paper). If we included only adult  $\delta^{15}\text{N}_{\text{collagen}}$  values, the overall trophic offset between adult  
 558 humans and herbivores is +2.5‰ and it is slightly larger with the Barbary sheep, the most dominant  
 559 species in the site (+4.1‰). There were not enough carnivores (n=2) to accurately estimate the  
 560 trophic level effect TLE but based on our data it is around +2.8‰ for  $\delta^{15}\text{N}_{\text{herbivore-canid}}$ . Although  
 561 the canids could have been omnivorous, our CSIA analysis on nitrogen show that one of the  
 562 specimens has a carnivore trophic level (TP=2.9) (See section 4.4). The analyses were performed  
 563 on the root of the M1 of these individuals, less likely to be influenced by the nursing effect than  
 564 the crown (see section 3.3.2.2). The  $\delta^{15}\text{N}_{\text{collagen}}$  values show no significant relationship to the sex  
 565 of the human individuals (Supplementary Table 9).

566

567 **Supplementary Table 9:** Chi-squared and p-value of Kruskal Wallis tests comparing N isotope ratios with the sex  
 568 of the human samples from Taforalt

| No age considered       | chi-squared | p value | p-value<0.05 |
|-------------------------|-------------|---------|--------------|
| Biological sex (Adult)  | 0.3247      | 0.5688  | No           |
| Biological sex (Infant) | 0.22059     | 0.6386  | No           |

569

570 4.3.3 Comparison with published results from Taforalt (Lee-Thorp et al., 2019)<sup>98</sup>

571

572 In our study, we observed a trophic level spacing ( $\Delta^{15}\text{N}_{\text{collagen}} \text{TLS}_{\text{herbivore-human}}$ ) of 2.5, which differs  
 573 from the  $\Delta^{15}\text{N}_{\text{collagen}} \text{TLS}$  value of +4.2‰ reported by Lee-Thorp et al. for Taforalt<sup>59,91</sup>. This  
 574 variation in  $\Delta^{15}\text{N}_{\text{collagen}} \text{TLS}$  values suggests potential differences in the species sampled for the  
 575 isotopic analyses. Notably, Barbary sheep was the most frequently sampled species in Lee-Thorp's  
 576 study. Lee-Thorp et al.<sup>98</sup> reported an average  $\delta^{15}\text{N}_{\text{collagen}}$  value of  $+6.42 \pm 1.72\text{‰}$  for all the

577 herbivores, while our study observed an average  $\delta^{15}\text{N}_{\text{collagen}}$  value of  $8.3 \pm 3.16\%$ . Our study and  
 578 Lee-Thorp et al. both found substantial variability in  $\delta^{15}\text{N}$  values for Barbary sheep. This  
 579 variability in  $\delta^{15}\text{N}$  values within the Barbary sheep population may be attributed to the flexible  
 580 dietary habits of this species, and it underscores the challenges of characterizing a stable baseline  
 581 when considering this species (Supplementary Table 10). No carnivore (or canid) was analysed in  
 582 their study to estimate the trophic level effect. Furthermore, it is essential to note that our study  
 583 employed both teeth and bone collagen for isotopic analysis, whereas Lee-Thorp et al.<sup>98</sup> focused  
 584 solely on bone collagen.

585 Apart from Barbary sheep, we observed similar  $\delta^{15}\text{N}_{\text{collagen}}$  values for other species (Supplementary  
 586 Table 10). Comparing our results to Lee-Thorp et al.<sup>98</sup>, the  $\delta^{15}\text{N}_{\text{collagen}}$  values for Equids and  
 587 *Gazelle* sp. in both datasets show alignment, indicating some consistency in the dietary patterns of  
 588 these species in the Taforalt region. Furthermore, both studies observed no evidence of marine  
 589 resource consumption by the population, a finding that corroborates the conclusion that the  
 590 Taforalt population had a limited marine dietary component.

591 In their study, Lee-Thorp et al.<sup>98</sup> also analyzed the bone collagen of some of the same human  
 592 individuals as in our study (Supplementary Table 10). The  $\delta^{15}\text{N}_{\text{collagen}}$  values obtained for bone  
 593 collagen in their analysis closely align with our results. However, it is worth noting that there was  
 594 one exception, where individual 13 exhibited a relatively higher  $\delta^{15}\text{N}_{\text{collagen}}$  value (12.1‰)  
 595 compared to the values observed by Lee-Thorp et al.<sup>98</sup> (10.4‰). One potential explanation for this  
 596 variation could be that we sampled different bones with varying turnover rates. Bones with  
 597 different turnover rates, such as rib bones and long bones, can record different aspects of an  
 598 individual's diet over time<sup>99</sup>. However, the specific bone type analyzed for isotopic differences  
 599 was not specified in the previous publication.

600

601 **Supplementary Table 10:** Comparison between the average  $\delta^{15}\text{N}_{\text{collagen}}$  values obtained from Lee-Thorp et al.<sup>98</sup> and  
 602 the values obtained in our study from the same species and human individuals

| Study                    | Barbary sheep | Equids | Gazella | Ind.5 | Ind.6 | Ind.9 | Ind.13 | Ind.14 |
|--------------------------|---------------|--------|---------|-------|-------|-------|--------|--------|
| Lee-Thorp (bone)         | 6.4‰          | 8.1‰   | 7.4‰    | 9.7‰  | 12‰   | 12.1‰ | 10.4‰  | 10.9‰  |
| This study (all tissues) | 8.3‰          | 8.3‰   | 7.8‰    | 10.3‰ | 12.8‰ | 12.6‰ | 11.8‰  | -      |
| This study (bone)        | -             | -      | -       | -     | 12.5‰ | 12.3‰ | 12.1‰  | -      |

603

#### 604 **4.4 Carbon and nitrogen on single amino acids results**

##### 605 4.4.1 Data quality

606 We successfully obtained the amount of collagen required for conducting Compound-Specific  
607 Isotope Analysis (CSIA) for 54% of the samples.

608 Carbon and nitrogen isotope measurements on single amino acids were commercially performed  
609 by the University of Davis. The measurements are calibrated against certified standard reference  
610 materials from USGS and IAEA. Internal reference materials with known isotope values are used  
611 to measure accuracy and reproducibility. Reference materials were analyzed along with the  
612 samples and gave results consistent with expected values (Supplementary Table 11). For Carbon  
613 and Nitrogen, the His, Met are below LOQ for all samples. Hyp, Ile, Tyr are below LOQ for select  
614 samples.

615 In addition, we performed two additional controls:

616 1) We sent the reference material SRM 1477c (bovine liver) along with our samples to the  
617 University of Davis for the analyses. The SRM 1477c was previously analysed and  
618 published in Jaouen et al (2019)<sup>100</sup> (Supplementary Table 11). The carbon, the amino acids  
619 Ala, Gly, Leu, Lys, Val, Pro Phe and Val are within the values published in Jaouen et al.  
620 2019<sup>100</sup> except for the Asx, Glx and Thr. Since the publication of Jaouen et al., 2019,  
621 significant advancements have been made in measuring carbon isotope values of threonine  
622 (Thr). Unfortunately, there is currently a lack of available carbon isotopic data on Thr for  
623 SMR1577C beyond the aforementioned study. We should also mention that we did not  
624 include the Thr results in our PCA. For nitrogen (Supplementary Table 11) Ala, Asx, Glx,  
625 Leu, Pro, Ser, Thr and Val are within the published values except for Lys, Phe. For some  
626 of the amino acids, our current findings differ from those reported in Jaouen et al. 2019,  
627 but we cannot definitively determine whether our values or the values published in 2019  
628 are accurate.

629 2) Following the recommendations of O'Connell and Collins (2017)<sup>101</sup>, we verified the  
630 existence of a correlation between isotope ratios measured in hydroxyproline and proline  
631 (Supplementary Figure 6; Supplementary Figure 7).

632 According to a previous study, the correlation between the  $\delta^{15}\text{N}$  values of the proline (Pro) and  
633 hydroxyproline (Hyp) is essential to assess the data quality (O'Connell and Collins, 2018)<sup>101</sup>. Since  
634 the nitrogen in Hyp is synthesized from Pro<sup>101</sup>, their  $\delta^{15}\text{N}$  values are expected to be relatively equal  
635 and the plot of  $\delta^{15}\text{H}_{\text{Hyp}}$  vs.  $\delta^{15}\text{N}_{\text{Pro}}$  should give a slope close to 1. We verified this on our samples  
636 and it shows that there is a strong correlation between the  $\delta^{15}\text{N}$  values of these amino acids ( $y =$   
637  $0.9729x + 0.1639$ ;  $R^2 = 0.9898$ ) (Supplementary Figure 6).

638 For  $\delta^{13}\text{C}$ , the  $\delta^{13}\text{C}_{\text{Hyp}}$  was plotted against  $\delta^{13}\text{C}_{\text{Pro}}$  but the slope was ( $y = 0.8652x - 3.276$   
639  $R^2 = 0.5741$ ), which is inconsistent with the slope of one expected. Hydroxyproline data are  
640 systematically enriched compared to proline data. For this reason, we plotted in grey color  
641 (Supplementary Figure 7) the samples that showed an offset superior to 1‰ between  $\delta^{13}\text{C}_{\text{Hyp}}$  and  
642  $\delta^{13}\text{C}_{\text{Pro}}$ . It corresponds to nine samples out of 29 samples.

643

644 **Supplementary Table 11:** Carbon and nitrogen isotope ratios of single amino acids measured in the reference material SRM 1577c in our study compared to  
 645 published values in Jaouen et al., 2019<sup>100</sup>

646

|                                                    | Ala               |                           | Asx               |                           | Glx               |                           | Gly               |                           | Leu               |                           | Lys               |                           |
|----------------------------------------------------|-------------------|---------------------------|-------------------|---------------------------|-------------------|---------------------------|-------------------|---------------------------|-------------------|---------------------------|-------------------|---------------------------|
|                                                    | <i>This study</i> | <i>Jaouen et al. 2019</i> | <i>This study</i> | <i>Jaouen et al. 2019</i> | <i>This study</i> | <i>Jaouen et al. 2019</i> | <i>This study</i> | <i>Jaouen et al. 2019</i> | <i>This study</i> | <i>Jaouen et al. 2019</i> | <i>This study</i> | <i>Jaouen et al. 2019</i> |
| <b>Mean <math>\delta^{13}\text{C}</math> value</b> | -20.18            | -19.82                    | -16.06            | -12.81                    | -14.63            | -16.56                    | -10.04            | -8.10                     | -28.89            | -29.66                    | -16.64            | -15.89                    |
| <b>SD</b>                                          | 1.14              | 0.47                      | 0.91              | 0.25                      | 0.51              | 0.41                      | 0.98              | 1.15                      | 0.01              | 0.71                      | 0.17              | 1.2                       |
| <b>n</b>                                           | 2                 | 3                         | 2                 | 3                         | 2                 | 3                         | 2                 | 3                         | 2                 | 3                         | 2                 | 1                         |
|                                                    | Phe               |                           | Pro               |                           | Ser               |                           | Thr               |                           | Tyr               |                           | Val               |                           |
|                                                    | <i>This study</i> | <i>Jaouen et al. 2019</i> | <i>This study</i> | <i>Jaouen et al. 2019</i> | <i>This study</i> | <i>Jaouen et al. 2019</i> | <i>This study</i> | <i>Jaouen et al. 2019</i> | <i>This study</i> | <i>Jaouen et al. 2019</i> | <i>This study</i> | <i>Jaouen et al. 2019</i> |
| <b>Mean <math>\delta^{13}\text{C}</math> value</b> | -25.15            | -25.1                     | -18.35            | -18.68                    | -7.78             |                           | -9.74             | -7.23                     | -30.9             |                           | -24.57            | -25.2                     |
| <b>SD</b>                                          | 0.23              | 0.50                      | 0.59              | 0.19                      | 0.77              |                           | 0.06              | 0.25                      | 1.2               |                           | 0.18              | 0.3                       |
| <b>n</b>                                           | 2                 | 3                         | 2                 | 3                         | 2                 |                           | 2                 | 1                         | 2                 |                           | 2                 | 3                         |

656

657

658

|                       | Ala               |                           | Asx               |                           | Glx               |                           | Leu               |                           | Lys               |                           | Phe               |                           |
|-----------------------|-------------------|---------------------------|-------------------|---------------------------|-------------------|---------------------------|-------------------|---------------------------|-------------------|---------------------------|-------------------|---------------------------|
|                       | <i>This study</i> | <i>Jaouen et al. 2019</i> | <i>This study</i> | <i>Jaouen et al. 2019</i> | <i>This study</i> | <i>Jaouen et al. 2019</i> | <i>This study</i> | <i>Jaouen et al. 2019</i> | <i>This study</i> | <i>Jaouen et al. 2019</i> | <i>This study</i> | <i>Jaouen et al. 2019</i> |
| <b>Mean</b>           |                   |                           |                   |                           |                   |                           |                   |                           |                   |                           |                   |                           |
| $\delta^{15}\text{N}$ | 12.18             | 10.37                     | 10.01             | 10.27                     | 10.69             | 10.30                     | 7.24              | 4.95                      | 7.02              | 2.75                      | 10.10             | 8.25                      |
| <b>SD</b>             | 0.38              | 0.61                      | 0.88              | 1.15                      | 0.68              | 0.40                      | 0.16              | 1.86                      | 0.67              | 1.11                      | 0.38              | 0.12                      |
| <b>n</b>              | 2                 | 3                         | 2                 | 3                         | 2                 | 3                         | 2                 | 3                         | 2                 | 2                         | 2                 | 3                         |
|                       | Pro               |                           | Ser               |                           | Thr               |                           | Tyr               |                           | Val               |                           |                   |                           |
|                       | <i>This study</i> | <i>Jaouen et al. 2019</i> | <i>This study</i> | <i>Jaouen et al. 2019</i> | <i>This study</i> | <i>Jaouen et al. 2019</i> | <i>This study</i> | <i>Jaouen et al. 2019</i> | <i>This study</i> | <i>Jaouen et al. 2019</i> |                   |                           |
| <b>Mean</b>           |                   |                           |                   |                           |                   |                           |                   |                           |                   |                           |                   |                           |
| $\delta^{15}\text{N}$ | 14.91             | 13.70                     | 10.85             | 9.37                      | -6.74             | -5.77                     | 4.76              |                           | 10.48             | 10.77                     |                   |                           |
| <b>SD</b>             | 0.02              | 0.57                      | 0.78              |                           | 1.2               | 0.88                      | 0.81              |                           | 0.73              | 0.63                      |                   |                           |
| <b>n</b>              | 2                 | 3                         | 2                 | 1                         | 2                 | 3                         | 2                 |                           | 2                 | 3                         |                   |                           |

659

660

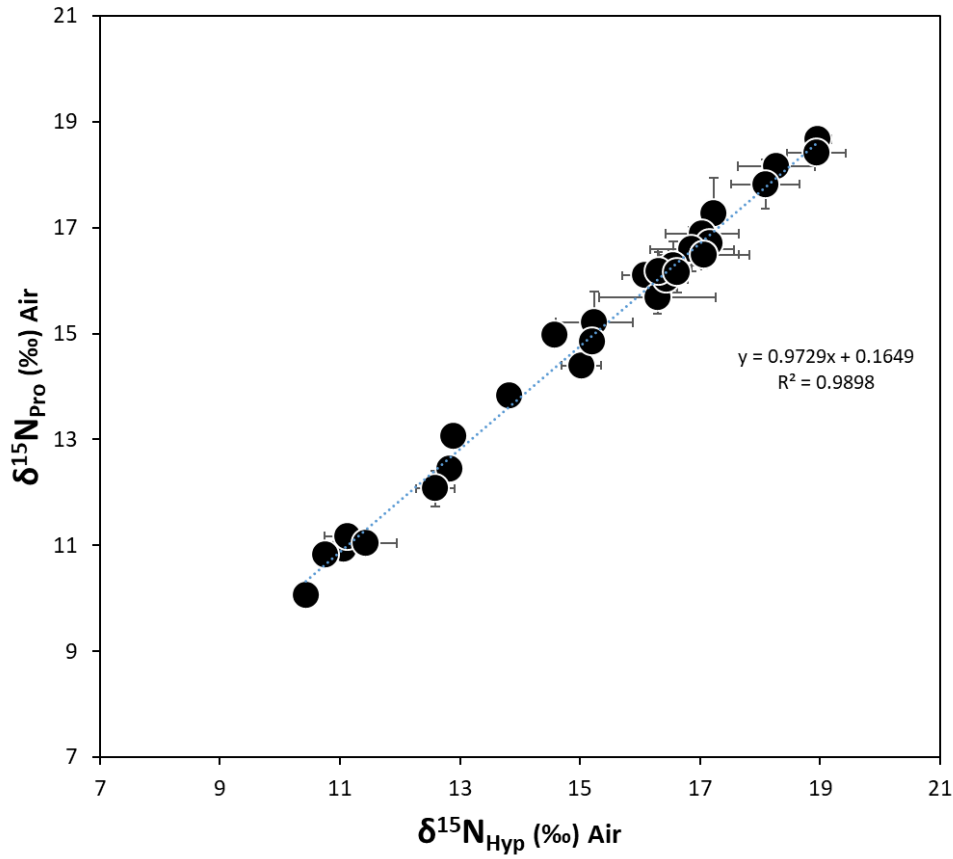

677 **Supplementary Figure 6:** Comparison of collagen proline and hydroxyproline  $\delta^{15}\text{N}$  values of the fauna and  
 678 humans from Taforalt ( $n_{\text{samples}} = 29$ ). The error bars represent the standard deviation of measurements and the points  
 679 represent the mean value of the measurements (centre)

680

681

682

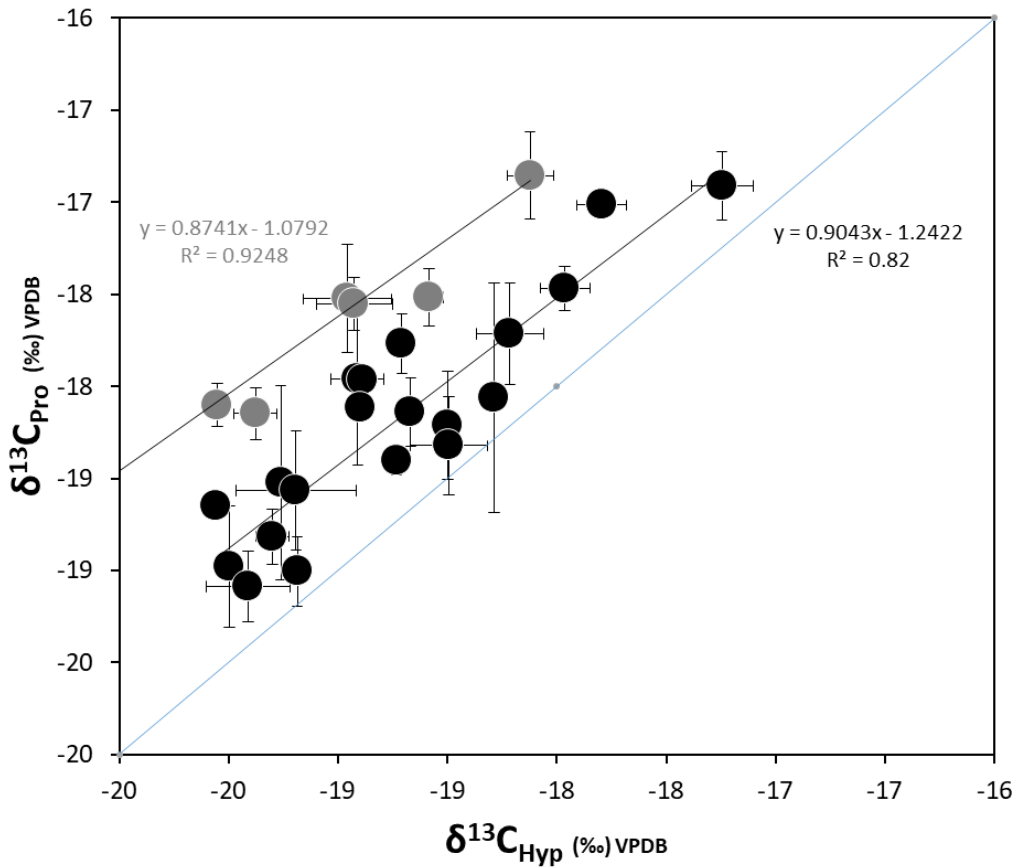

683

684 **Supplementary Figure 7:** Comparison of collagen proline and hydroxyproline  $\delta^{13}\text{C}$  values from our study ( $n_{\text{samples}}=$   
 685 29). The blue line shows the expected slope  $x=y$  for the  $\delta^{13}\text{C}_{\text{Hyp}}$  against  $\delta^{13}\text{C}_{\text{Pro}}$ . The black dots are the samples which  
 686 showed an offset inferior to 1‰ between  $\delta^{13}\text{C}_{\text{Hyp}}$  and  $\delta^{13}\text{C}_{\text{Pr}}$ ; the grey dot showed an offset superior to 1‰ between  
 687  $\delta^{13}\text{C}_{\text{Hyp}}$  and  $\delta^{13}\text{C}_{\text{Pro}}$ . The error bars represent the standard deviation of measurements.

#### 688 4.4.2 Description of carbon isotope ratios of amino acids in Taforalt samples

689 In order to assess the diet of the human from Taforalt using the individual amino acids isotopic  
 690 values we used the principal component analysis (PCA) method used by Ma et al., 2021<sup>102</sup> to  
 691 separate between different dietary groups (Extended Data Figure .2). We present the first two  
 692 components with the calculated eigenvalues for each of the features used in the (Supplementary  
 693 Table 23). The  $\delta^{13}\text{C}_{\text{collagen}}$ ,  $\delta^{13}\text{C}_{\text{Pro}}$ ,  $\delta^{13}\text{C}_{\text{Asp}}$ ,  $\delta^{13}\text{C}_{\text{Lys}}$ ,  $\delta^{13}\text{C}_{\text{Ala}}$ ,  $\delta^{13}\text{C}_{\text{Val}}$ ,  $\delta^{13}\text{C}_{\text{Glx}}$ ,  $\delta^{13}\text{C}_{\text{Gly}}$  have the highest  
 694 positive effect on the first principal component (PC1), while  $\Delta^{13}\text{C}_{\text{Gly-Phe}}$ ,  $\Delta^{13}\text{C}_{\text{Val-Phe}}$ , and  $\delta^{15}\text{N}_{\text{collagen}}$



695 have most significant negative effect on the second principal component (PC2) (Supplementary  
696 Table 23).

697 When plotting the human and fauna from Taforalt with different dietary groups: C<sub>3</sub> animals, C<sub>3</sub>  
698 humans, C<sub>4</sub> humans, and the marine and freshwater consumers from published studies (Extended  
699 Data Figure.2, Supplementary Figure 8, Supplementary Figure 9, Supplementary Figure 10) we  
700 see that our individual plot well with the C<sub>3</sub> consumers. This confirms their terrestrial C<sub>3</sub> diet and  
701 the absence/ rare consumption of marine and freshwater resources. Some of the herbivores could  
702 integrate some C<sub>4</sub> plants components into their diets, as they slightly differ from the range  
703 observed among C<sub>3</sub> plant consumers in other studies (Extended Data Figure.2).

704 When looking at the bivariate plots of  $\delta^{13}\text{C}_{\text{Lys}}$  vs.  $\Delta^{13}\text{C}_{\text{Val-Phe}}$  as well as  $\Delta^{13}\text{C}_{\text{Gly-Phe}}$  as suggested by  
705 Ma et al., 2021<sup>102</sup>, the lysine carbon isotope values are consistent with a diet mostly relying on C<sub>3</sub>  
706 resources, and the  $\Delta^{13}\text{C}_{\text{Val-Phe}}$  and  $\Delta^{13}\text{C}_{\text{Gly-Phe}}$  confirm the reliance on terrestrial resources  
707 (Supplementary Figure 8, Supplementary Figure 9). A PCA including CSIA Nitrogen isotope data  
708 is also available on Supplementary Figure 16.

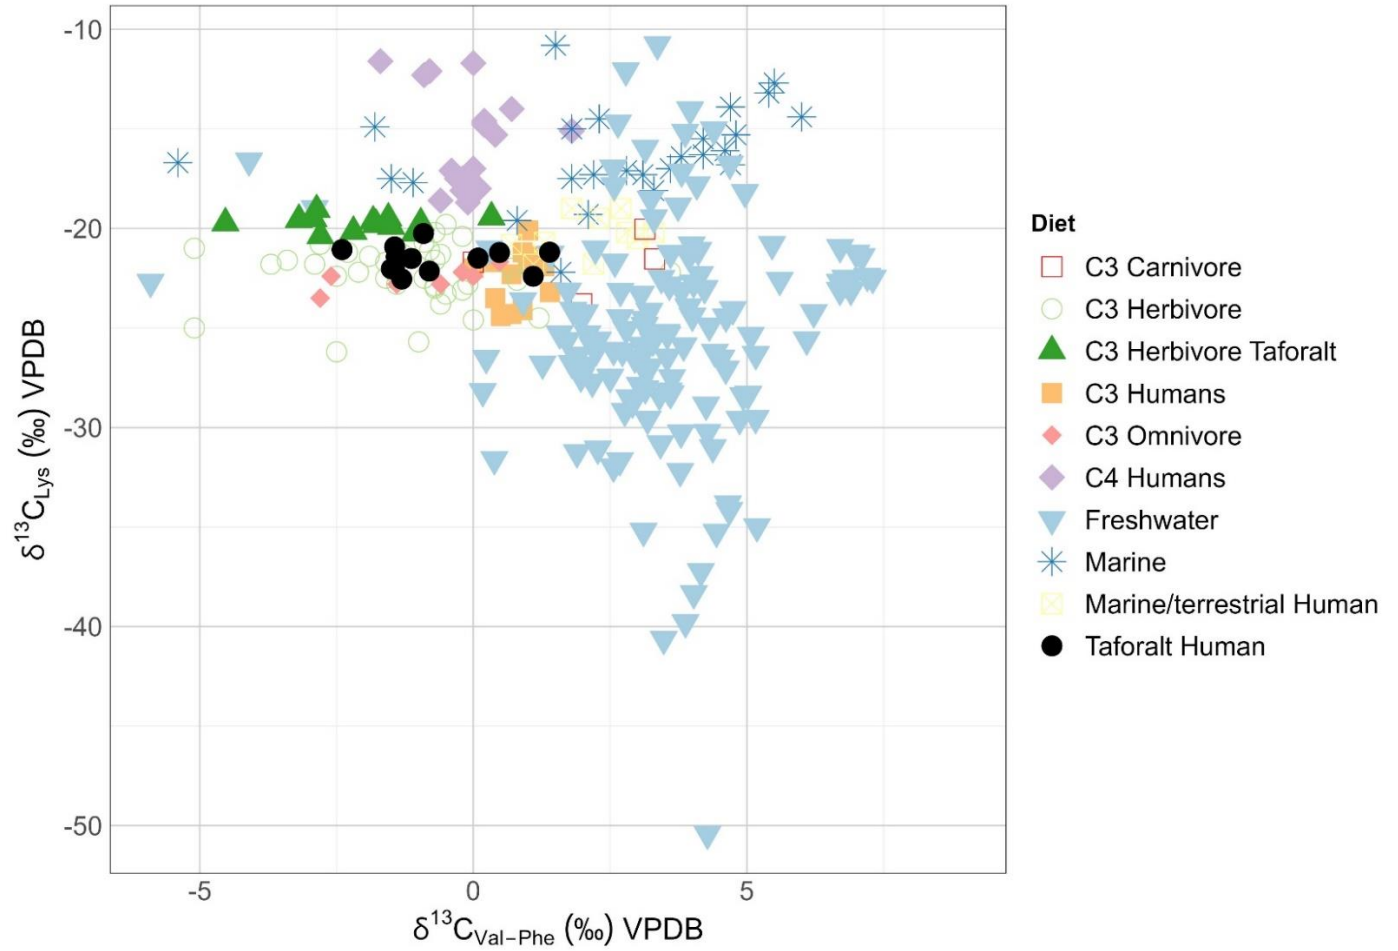

709

710 **Supplementary Figure 8:** Bivariate plots of the  $\delta^{13}C_{Lys}$  vs.  $\delta^{13}C_{Val-Phe}$  of the samples from Taforalt and  
 711 published data<sup>35,72,100,103-106,106</sup>.

712

713

714

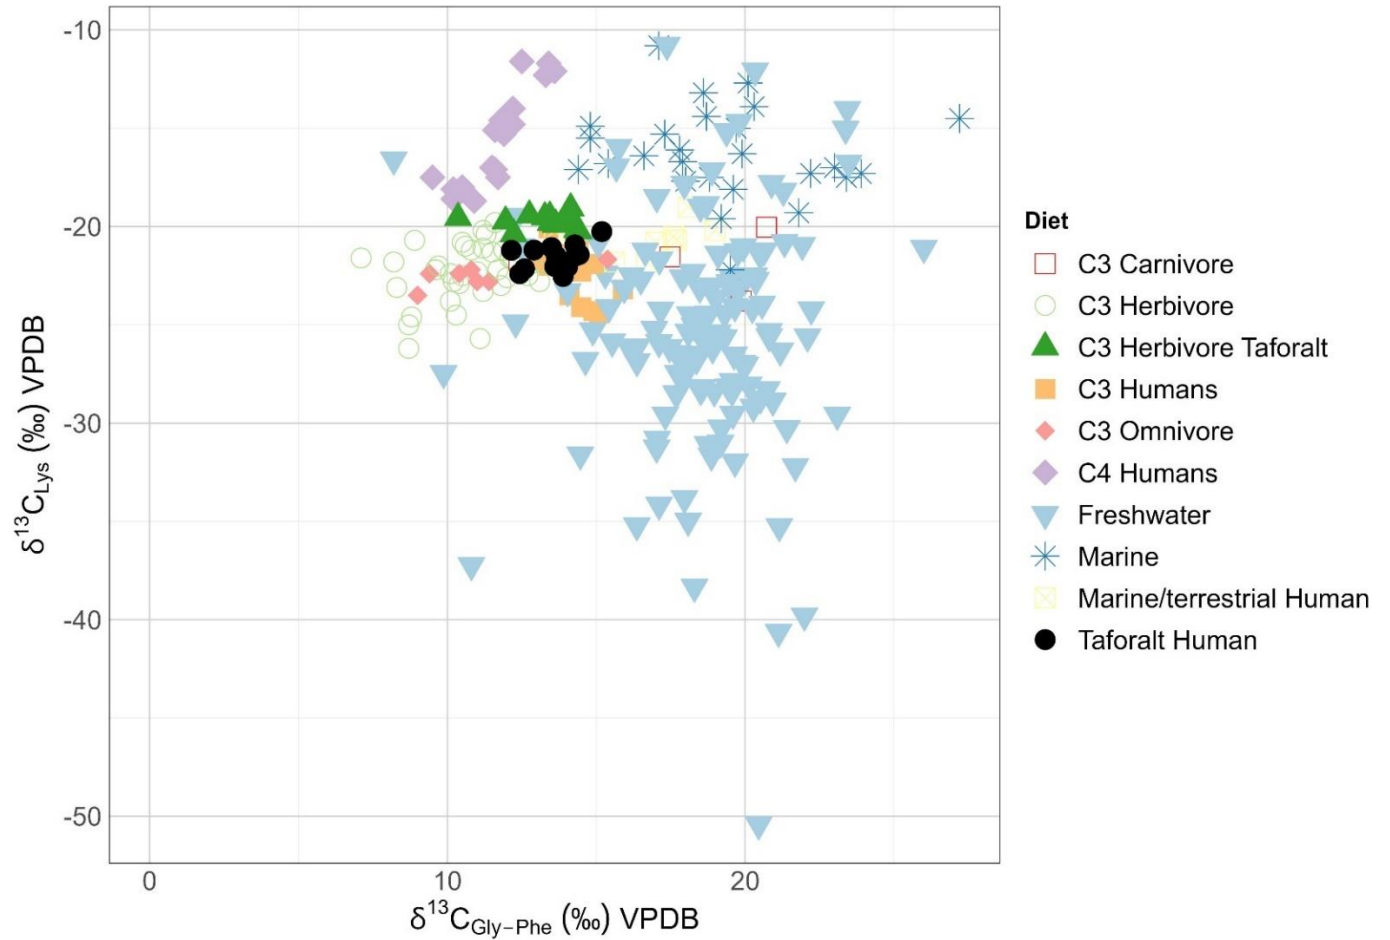

716 **Supplementary Figure 9:** Bivariate plots of the  $\delta^{13}\text{C}_{\text{Lys}}$  vs.  $\delta^{13}\text{C}_{\text{Gly-Phe}}$  of the samples from Taforalt and  
 717 published data<sup>35,72,100,103-106</sup>

718 Finally, we use the traditional representation of  $\delta^{13}\text{C}_{\text{Phe}}$  towards  $\delta^{13}\text{C}_{\text{Val}}$ <sup>35,36</sup>, which clearly  
 719 indicate a terrestrial diet based on C3 plants and animals feeding on C3 plants (Supplementary  
 720 Figure 10).

721

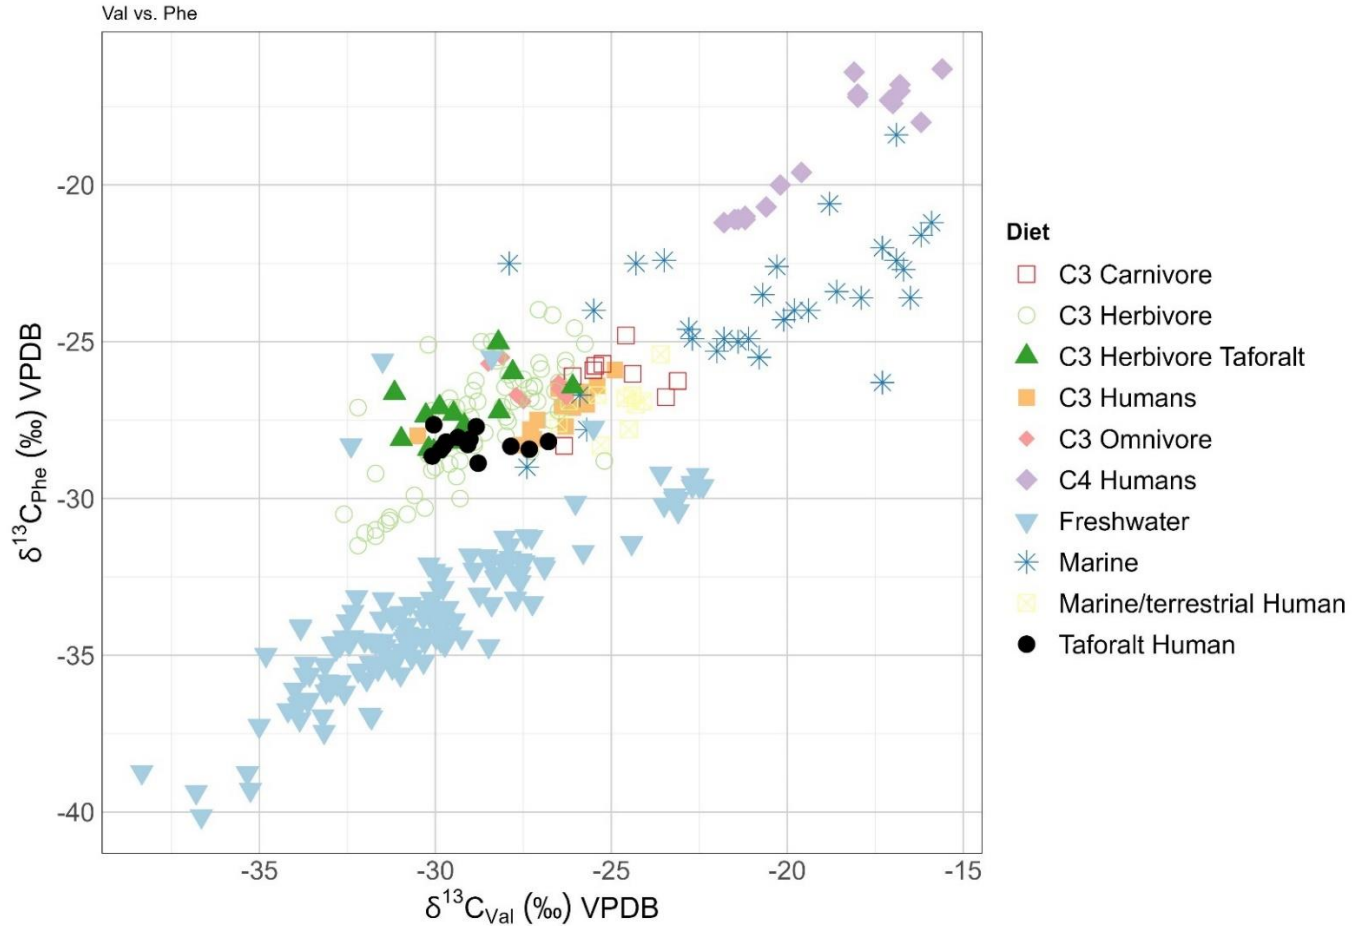

722

723 **Supplementary Figure 10:** Bivariate plot of the Taforalt  $\delta^{13}\text{C}_{\text{Phe}}$  and  $\delta^{13}\text{C}_{\text{Val}}$  results by dietary classification with  
 724 known types of dietary consumers from published data<sup>35,72,100,103-106</sup>

725

#### 726 4.4.3 Description of nitrogen isotope ratios of amino acids in Taforalt samples

##### 727 4.4.3.1 *Environmental variation of nitrogen isotope ratios*

728

729 The  $\delta^{15}\text{N}_{\text{Phe}}$  usually reflect the local baseline. In the overall samples, there is no correlation between  
 730 the  $\delta^{15}\text{N}_{\text{bulk}}$  and  $\delta^{15}\text{N}_{\text{Phe}}$  ( $r=0.17$ ,  $R^2= 0.04231$ ,  $p\text{-value: } 0.1463$ ) since this latter is not strongly  
 731 affected by the trophic enrichment. The herbivores in Taforalt exhibit a wide range of  $\delta^{15}\text{N}_{\text{Phe}}$  (9.1-  
 732 16.7‰) implying nitrogen isotope ratio variations related to the plants that they consume, which  
 733 in turn were impacted by environmental factors. A sample from Barbary sheep and an equid have  
 734 the highest  $\delta^{15}\text{N}_{\text{Phe}}$  values while the hare exhibits the lowest value (Supplementary Figure 11).  
 735 There are also variations within species. The two Barbary sheep have distinctive  $\delta^{15}\text{N}_{\text{Phe}}$  values of

736 16.7‰ and 11.6‰. However, they have similar TP (2.1). This indicates that the individuals had  
 737 access to plants with different N isotopic signatures, which explains the difference in the bulk  
 738 collagen. The humans  $\delta^{15}\text{N}_{\text{Phe}}$  values fall within the range of herbivores (10.4-13.7‰, mean=  
 739 12.23‰, Supplementary Figure 11). The low  $\delta^{15}\text{N}_{\text{Phe}}$  of the carnivores (n= 2; mean:  $10.8 \pm 0.9\%$ )  
 740 compared to the other species indicates that they prey on games with lower  $\delta^{15}\text{N}_{\text{Phe}}$  values. The  
 741 latter also have a low bulk collagen nitrogen value, explaining why the canids overlapped with  
 742 humans in the  $\delta^{15}\text{N}_{\text{collagen}}$ . There is a moderate to strong correlation between the TP and  $\delta^{15}\text{N}_{\text{Phe}}$  for  
 743 the human samples ( $r = -0.693558$ ,  $p\text{-value} < 0.05$ ). The humans with a lower trophic position seem  
 744 to have a relatively higher  $\delta^{15}\text{N}_{\text{Phe}}$ .

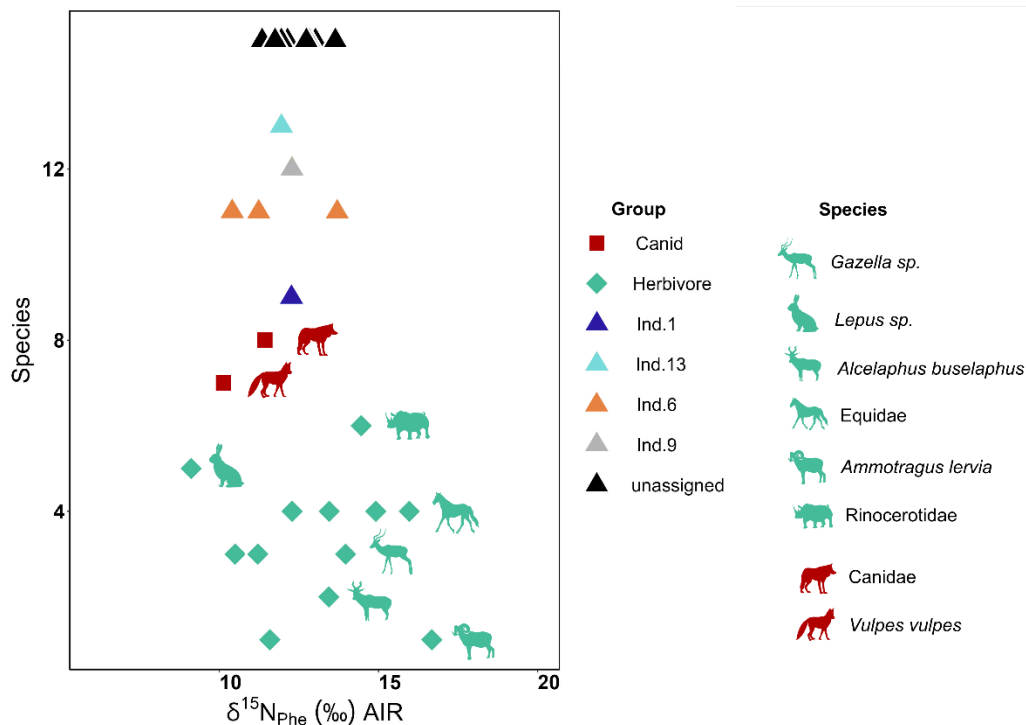

745  
 746 **Supplementary Figure 11:** The  $\delta^{15}\text{N}_{\text{Phe}}$  values from the collagen of the different faunal species analysed from  
 747 Taforalt in comparison with the human individuals

748 **4.4.3.2 Trophic levels of the different fauna specimens**

749  
 750 The  $\delta^{15}\text{N}$  of amino acids generally shows the trophic position (TP) of an individual regardless the  
 751 baseline variation effect. Thanks to our carbon isotope ratios, we know that there is no aquatic  
 752 food consumption at Taforalt, and we can then use the  $\text{C}_3$  equation<sup>107</sup> for the evaluation of the  
 753 trophic positions of the fauna and humans. These equations show a range of 1.7 to 2.3 for adult

754 herbivores (average =2.1), which is close to the theoretical value of 2. This type of variation around  
755 the value of 2 has been previously observed<sup>100,108,109</sup>.

756 For the Barbary sheep, both the tooth formed pre-weaning and post weaning have the same TP  
757 (TP=2.1) expected for herbivores, even the deciduous tooth. The TP of the deciduous teeth of the  
758 equid has also a TP of 2.1. As deciduous teeth are formed *in utero*, it is no surprise that the nursing  
759 effect cannot be observed.

760 Drought-tolerant herbivores show an average TP of 2.1 and the other herbivores of 2.0. This  
761 suggests that the metabolic adaptation to drought does not – or not strongly– influence the TP  
762 estimation from amino acids. We eliminate the possibility of suckling as an explanation for the  
763 high  $\delta^{15}\text{N}_{\text{collagen}}$  values for the Barbary sheep and the Equid since their TP is 2.1 despite their high  
764  $\delta^{15}\text{N}_{\text{collagen}}$ . Some herbivores have a TP above 2.1 it includes a hartebeest (TP= 2.3), hare (TP=2.3)  
765 and the rhinoceros (TP=2.3). It is possible that these individuals consumed plants with distinctive  
766  $\beta$  factor<sup>109</sup>. It is unlikely that the TP of 2.3 represents a suckling effect especially for the hare with  
767 a  $\delta^{15}\text{N}_{\text{collagen}}$  of 6‰.

768 The TP of the canid and the fox are respectively 2.9 and 2.7 (mean of 2.8) which is a little below  
769 the theoretical value of pure carnivores (TP=3) and could be explained by the opportunistic feeding  
770 habits of foxes. The second carnivore was only identified using traditional zooarchaeology as a  
771 canid. As the golden jackal (*Canis aureus*) is the most common Canidae in North Africa, we  
772 assume that our specimen might correspond to this species. The diet of the golden jackal consists  
773 primarily of small games (e.g., rodents, birds, hares...etc) and occasionally includes fruits<sup>73,110</sup>.

774

#### 775 **4.4.3.3 Trophic levels among humans**

776

777 The TP of human adults in the post-weaning period range from 2.6 to 2.2 (TP=  $2.4 \pm 0.2$ ,  $n_{\text{samples}}=$   
778 9), while the infants in the pre-weaning period have higher TP values 2.9-2.5 (TP=  $2.7 \pm 0.2$ ,  
779  $n_{\text{samples}}=5$ ).

780 The Ind.1 bone and an unassigned I2 showed a surprisingly low TP (2.2), also observed among  
781 herbivores due to the imprecision around the evaluation of the TP, indicating an almost exclusive  
782 vegetalian diet with a maximum of 20% of his dietary protein coming from meat. Knowing that

783 meat strongly dominates the intake of proteins in an omnivorous diet, the meat consumption is  
 784 likely to be less than 20% in mass.

785 **4.5 Sulphur isotope results**

786 4.5.1 Data quality

787 We successfully obtained the required amount of collagen for sulphur isotope analyses for only  
 788 three samples: a Barbary sheep, an equid and a human.

789 Reference materials were analyzed along with the samples and gave results consistent with the  
 790 expected values (Supplementary Table 12). Sulphur isotope ratios were commercially analyzed by  
 791 the society Isoanalytical are presented in the Supplementary Figure 12.

792 **Supplementary Table 12:** Reference standards used for sulphur stable isotopes analyses along with the accepted  
 793 values

| Standard  | material          | n | $\delta^{34}\text{S}_{\text{V-CDT}}$ (mean) | SD   | accepted values |
|-----------|-------------------|---|---------------------------------------------|------|-----------------|
| IA-R061   | (barium sulphate) | 3 | 20.26                                       | 0.03 | 20.33           |
| IAEA-SO-5 | (barium sulphate) | 2 | 0.35                                        | 0.19 | 0.50            |
| IA-R068   | (soy protein)     | 2 | 5.09                                        | 0.13 | 5.25            |
| IA-R069   | (tuna protein)    | 2 | 18.89                                       | 0.15 | 18.91           |

794

795 4.5.2 Sulphur isotopic data

796 Only three samples had enough collagen for the sulphur analyses. A Barbary sheep and an equid  
 797 gave values of +14.6 and +12.5‰, respectively. The unassigned human sample has a  $\delta^{34}\text{S}$  of  
 798 +12.87‰, which falls within the range of the herbivores (Supplementary Figure 12). The relatively

799 high  $\delta^{34}\text{S}$  in the samples from Taforalt possibly indicates the proximity of dietary resources for  
 800 both humans and non-human fauna to the coast (“sea spray effect”), since terrestrial animals are  
 801 expected to have values lower than +10‰<sup>70</sup>. Although the site is 40 km from the coast, the sea  
 802 spray effect can extend many kilometers inland in some cases<sup>68,70</sup> and could have affected the  
 803 vicinity around the Taforalt site<sup>93</sup>. Another explanation for the high  $\delta^{34}\text{S}$  values in our sample is  
 804 dust aerosols originating from the Sahara, which are rich in sulphur containing gypsum with high  
 805  $\delta^{34}\text{S}$  values between +12 to +16‰<sup>93,111,112</sup>. The restricted number of samples analyzed here does  
 806 not allow us to draw further conclusion.

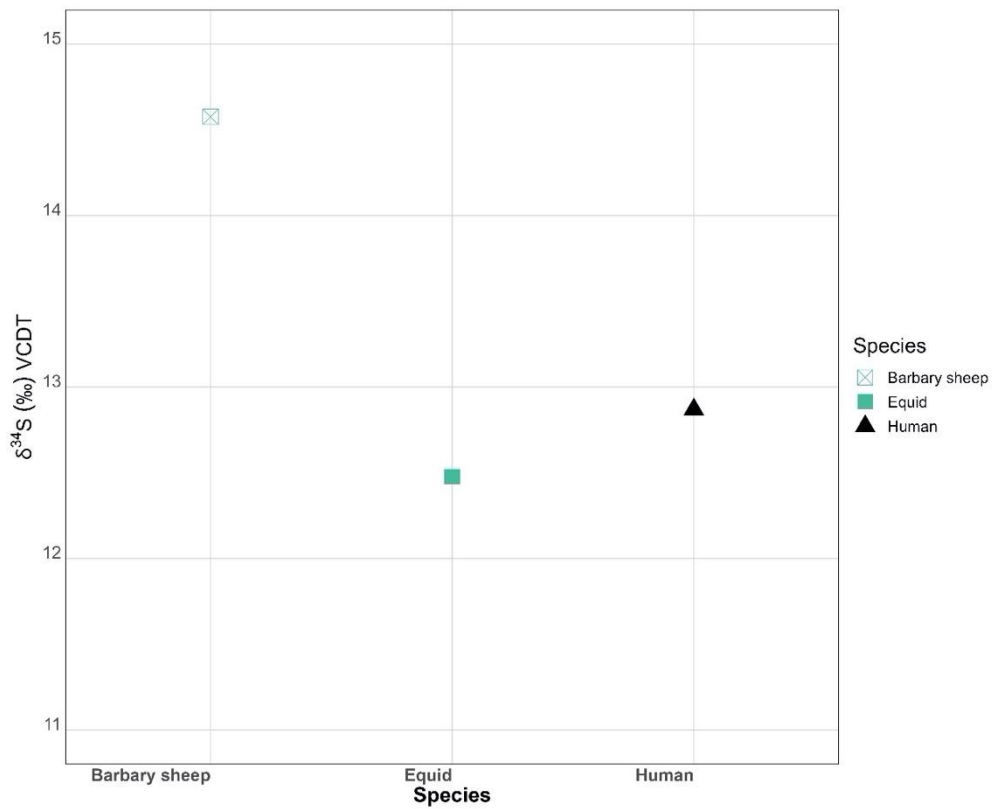

807  
 808 **Supplementary Figure 12:** Sulphur isotopic results of the fauna and an unassigned human from Taforalt. Barbary  
 809 sheep: SEVA 34566, Equid SEVA 34565 Human (unassigned): SEVA 34561

810 **4.6 Correlation between tracers**

811 There is a strong negative correlation between  $\delta^{66}\text{Zn}_{\text{enamel}}$  and trophic position (TP) ( $r = -0.73$ ,  
 812  $R^2 = 0.51$ ,  $p\text{-value} < 0.05$ ). However, if we exclude the infants the correlation of TP with  $\delta^{66}\text{Zn}_{\text{enamel}}$   
 813 ( $r = -0.78$ ,  $R^2 = 0.59$ ,  $p\text{-value} < 0.05$ ) is even stronger than with  $\delta^{15}\text{N}_{\text{collagen}}$  ( $r = 0.69$ ,  $R^2 = 0.45$ ,  $p\text{-}$   
 814  $\text{value} < 0.05$ ). The carnivores overlap with the humans and some herbivores in the N from bulk  
 815 collagen while with  $\delta^{66}\text{Zn}$  and  $\delta^{15}\text{N}$  on amino acids, the canids clearly have a higher trophic level



816 than the humans. This indicates that Zn isotope ratios are less impacted by baseline effects than  
817 bulk nitrogen isotope ratios (Figure 2 main paper).

818

819

## 820 5 Supplementary information 5: Additional discussion

### 821 5.1 Weaning at Taforalt:

822 Although a tooth (m2) formed during the breastfeeding period exhibits relatively high Zn isotope  
823 ratios ( $0.79 \pm 0.04\%$ ) (Extended Data Figure. 3), the zinc isotopic variation between enamel  
824 samples, including samples belonging to the same tooth, is not significant ( $n = 45$ , Kruskal-Wallis  
825 chi-squared = 3.6049,  $df = 2$ ,  $p$ -value = 0.1649). A M1 has a quite small value (Supplementary  
826 Figure 13) in contradiction to what has been observed in Lapa do Santo (hunter gatherer from  
827 Brazil) and Rennes (medieval Breton population)<sup>35,37</sup> (**Error! Reference source not found.**) but  
828 matching the conclusions of two other studies performed on a single hominin individual showing  
829 that an M1 can record a post-weaning signal<sup>32,75</sup> (**Error! Reference source not found.**). First  
830 molars have their crown formed between birth and 2.5yrs, and our sampling selected parts formed  
831 between  $\approx 1$  to 2.5 years old (See Supplementary Information 7, Teeth scans). The variations seen  
832 in teeth for the individual 5 (Extended Data Figure. 3) could suggest that the canine and the M1  
833 record the end of the weaning. One unassigned individual has a quite high values in their I2  
834 compared to the rest of the population, which could suggest a longer breastfeeding period  
835 compared to other individuals. Zinc mostly deposits during the maturation phase of the enamel,  
836 and not at the earlier stages of the formation<sup>40,113</sup>. This may explain why we do not see a clear  
837 signature of breastfeeding at Taforalt, if weaning already started around 1 year of age for most of  
838 the population.

839

840

841

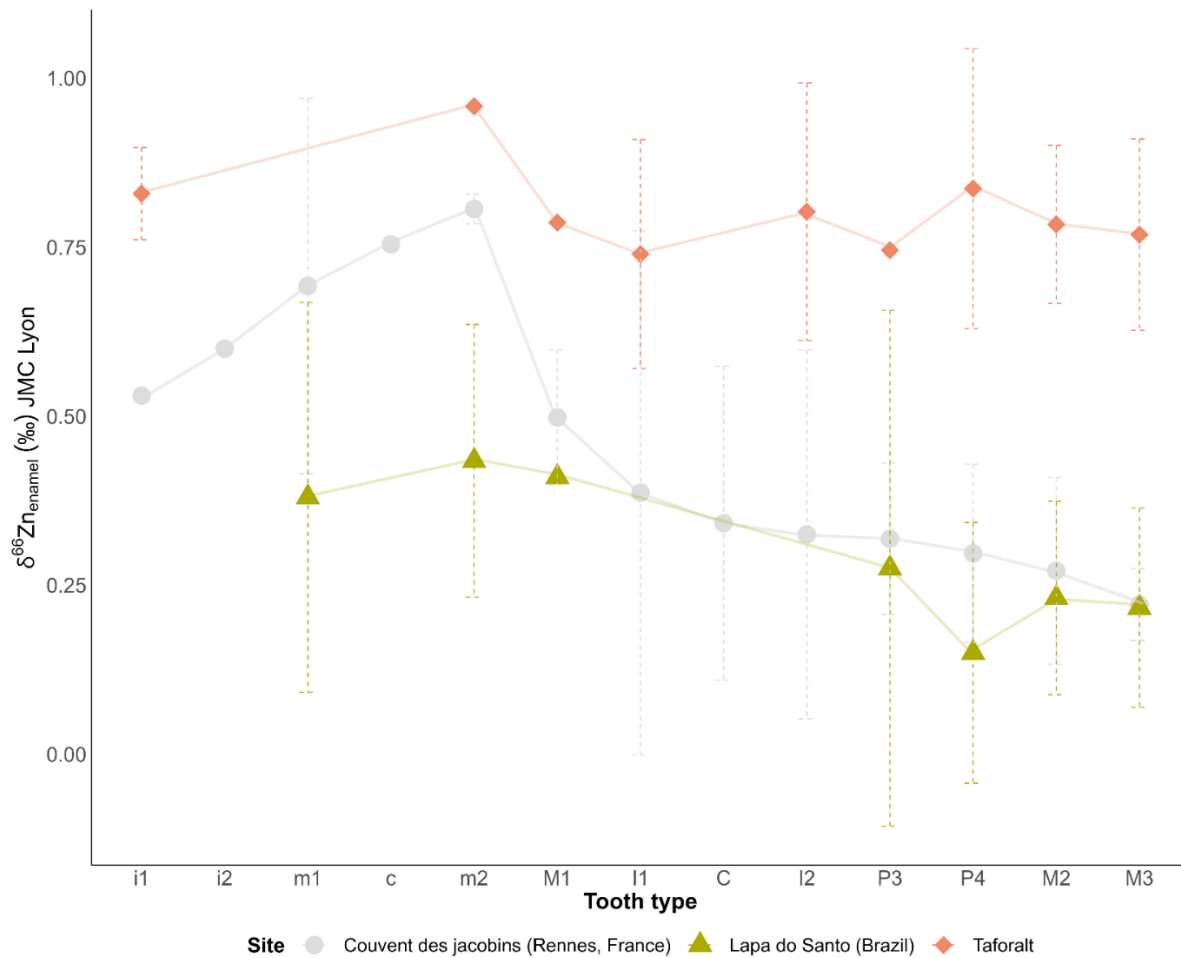

842

843 **Supplementary Figure 13:** The average Zn isotope ratios per dental specimen from Taforalt ( $n_{\text{samples}}=24$ )  
 844 compared to those from the Medieval site of Rennes ( $n_{\text{samples}}=35$ ), France<sup>45</sup> and Lapa do Santo ( $n_{\text{samples}}=26$ ), Brazil<sup>48</sup>.  
 845 The teeth are ranked from the earliest forming enamel to the latest forming crown. The standard deviation for the zinc  
 846 value in a tooth is represented in dashed line. Each point represents the average zinc values of the same type of tooth.

847

848 For  $\delta^{15}\text{N}$ , the difference between breastfeeding and post-weaning period is clearer than with  $\delta^{66}\text{Zn}$   
 849 (Supplementary Figure 14), but still lower (1.65‰) than what is usually observed (2-3‰) for  
 850  $\delta^{15}\text{N}^{99,100}$ . The high TPs of the infants are associated with breastfeeding, which elevates their  
 851 trophic level above that of the mother<sup>100</sup>. However, the TP of the deciduous second molar of Ind.6  
 852 indicates the individual was breastfed during the formation time of the root which was incomplete  
 853 and then stopped at his death, while that of the rib bone recorded a lower TP probably indicating  
 854 the introduction of solid food to his diet before death (12 months) since the rib cage has a faster  
 855 turnover than the other bones (Figure 4, Main paper). It means that breastfeeding had already been  
 856 strongly decreased or the child was weaned shortly before his death, but lived at least two weeks

857 after this change. This decrease in trophic level was also detected on the bulk  $\delta^{15}\text{N}_{\text{collagen}}$   
 858 (Supplementary Figure 14).

859

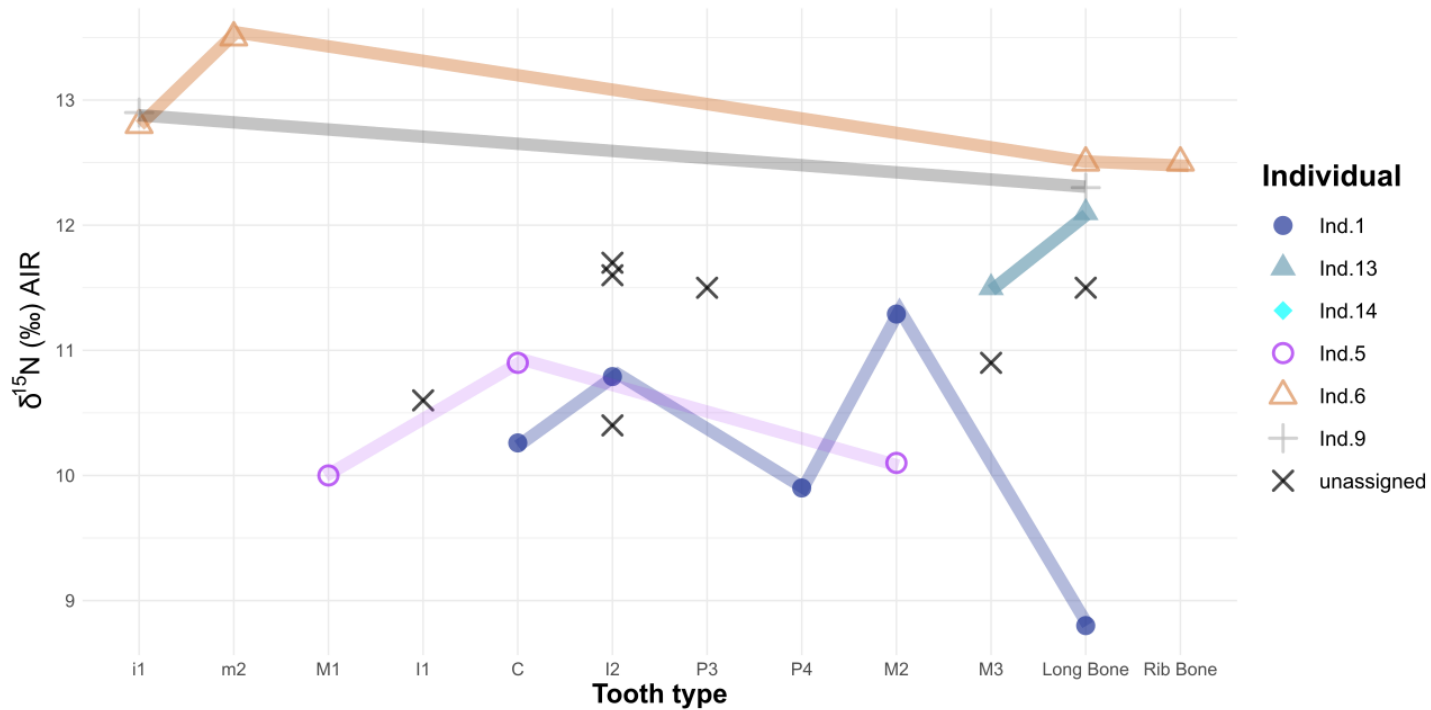

860

861 **Supplementary Figure 14:** The  $\delta^{15}\text{N}_{\text{collagen}}$  values from dentine and bone bulk collagen of different individuals  
 862 analyzed in this study. The teeth are ranked from the earliest forming to the latest forming the standard deviation for  
 863  $\delta^{15}\text{N}_{\text{collagen}}$  is represented in a dashed line. The data from the same individual are connected with a line.

## 864 5.2 Trophic level prediction with Zn

865 The CSIA of amino acids (CSIA-AA) are powerful techniques to reconstruct the trophic position  
 866 of individuals using the TP (C3) equation<sup>34</sup>. However, since only a few samples yielded enough  
 867 preserved collagen, we were able to estimate the TP of only 25 samples. Given the fact that Zn is  
 868 preserved in all the analyzed samples and shows a strong correlation with the TP (on amino acids),  
 869 we established an equation to predict the TP of samples that did not yield enough collagen using  
 870 the  $\delta^{66}\text{Zn}$  values:

$$871 \text{TP}_{\text{Zn}} (\text{equation}) = -0.8959 * \delta^{66}\text{Zn}_{\text{enamel}} + 3.1455$$

872 The average value of the human from Taforalt was 2.5 using the equation above while the  $\text{TP}_{\text{AA}}$   
 873 equation calculated from amino acids give an average of 2.4 for the adult humans. Because the

874 influence of the local geology on Zn isotope ratios and notable baseline differences between  
 875 tropical and non-tropical sites<sup>38,46</sup>, this equation is possibly only valid for sites with similar biomes  
 876 and geologies. For example, applying the equation to terrestrial mammals from Tam Hay Marklot,  
 877 it predicts a TL of 3 for carnivores, a TL of 2.8 for omnivores and a TL of 2.5 for herbivores<sup>38</sup>.  
 878 Applying the same equation to terrestrial fauna from Rennes gives a TL= 2.6 for carnivores and  
 879 2.3 for herbivores while it places humans at a TP of 2.8 confirming the intensive animal food  
 880 consumption in this site<sup>45</sup>.

881 **Supplementary Table 13:** Trophic position estimation of human and animals from Taforalt based on the  $\delta^{66}\text{Zn}$   
 882 following the established TP equation mentioned above.

| <i>SEVA</i>  | <i>Site</i> | <i>Species</i> | <i>Zn</i> | <i>TP (CSIA)</i> | <i>TP (Zn)</i> |
|--------------|-------------|----------------|-----------|------------------|----------------|
| <b>35819</b> | Taforalt    | Barbary sheep  | 1.05      |                  | 2.2            |
| <b>35821</b> | Taforalt    | Barbary sheep  | 1.26      | 2.1              | 2.0            |
| <b>35830</b> | Taforalt    | Barbary sheep  | 0.82      | 2.1              | 2.4            |
| <b>35831</b> | Taforalt    | Barbary sheep  | 1.16      |                  | 2.1            |
| <b>35824</b> | Taforalt    | Hartebeest     | 1.22      | 2.2              | 2.1            |
| <b>35833</b> | Taforalt    | Gazelle        | 1.10      | 2.0              | 2.2            |
| <b>35820</b> | Taforalt    | Equid          | 1.32      | 2.0              | 2.0            |
| <b>35822</b> | Taforalt    | Equid          | 1.34      | 1.7              | 1.9            |
| <b>35825</b> | Taforalt    | Equid          | 1.38      | 1.7              | 1.9            |
| <b>35826</b> | Taforalt    | Equid          | 1.34      | 2.1              | 1.9            |
| <b>35829</b> | Taforalt    | Gazelle        | 0.85      | 1.9              | 2.4            |
| <b>35835</b> | Taforalt    | Gazelle        | 1.08      | 2.0              | 2.2            |
| <b>35823</b> | Taforalt    | Hare           |           | 2.3              |                |
| <b>35827</b> | Taforalt    | Hartebeest     | 1.26      | 2.3              | 2.0            |
| <b>35836</b> | Taforalt    | Rhinoceros     | 1.10      | 2.3              | 2.2            |
| <b>34565</b> | Taforalt    | Equid          | 1.14      |                  | 2.1            |
| <b>35828</b> | Taforalt    | Red fox        | 0.61      | 2.9              | 2.6            |
| <b>35832</b> | Taforalt    | Gazelle        | 1.24      |                  | 2.0            |

|                |          |               |      |     |     |
|----------------|----------|---------------|------|-----|-----|
| <b>35834</b>   | Taforalt | Canid         | 0.42 | 2.7 | 2.8 |
| <b>34566</b>   | Taforalt | Barbary sheep | 0.82 |     | 2.4 |
| <b>35961</b>   | Taforalt | Adult human   | 0.83 | 2.6 | 2.4 |
| <b>35962</b>   | Taforalt | Adult human   | 0.71 |     | 2.5 |
| <b>35967</b>   | Taforalt | Adult human   | 0.78 |     | 2.4 |
| <b>35970</b>   | Taforalt | Adult human   | 0.76 |     | 2.5 |
| <b>35979</b>   | Taforalt | Adult human   | 0.76 |     | 2.5 |
| <b>35985</b>   | Taforalt | Adult human   |      | 2.2 |     |
| <b>35963.A</b> | Taforalt | Adult human   | 0.75 |     | 2.5 |
| <b>35963.B</b> | Taforalt | Adult human   | 0.83 |     | 2.4 |
| <b>35981</b>   | Taforalt | Adult human   | 0.92 |     | 2.3 |
| <b>35977</b>   | Taforalt | Adult human   | 0.76 |     | 2.5 |
| <b>35978</b>   | Taforalt | Adult human   | 0.74 |     | 2.5 |
| <b>35971.A</b> | Taforalt | Adult human   | 0.80 |     | 2.4 |
| <b>35971.B</b> | Taforalt | Adult human   | 0.79 |     | 2.4 |
| <b>35975</b>   | Taforalt | Adult human   | 0.85 | 2.6 | 2.4 |
| <b>35975</b>   | Taforalt | Adult human   |      |     |     |
| <b>35980</b>   | Taforalt | Adult human   |      |     |     |
| <b>35959</b>   | Taforalt | Adult human   |      |     |     |
| <b>35959</b>   | Taforalt | Adult human   |      | 2.7 |     |
| <b>35960</b>   | Taforalt | Adult human   | 0.81 | 2.2 | 2.4 |
| <b>35968</b>   | Taforalt | Adult human   | 0.75 | 2.5 | 2.5 |
| <b>35969</b>   | Taforalt | Adult human   | 0.92 | 2.4 | 2.3 |
| <b>35972</b>   | Taforalt | Adult human   | 0.75 | 2.5 | 2.5 |
| <b>35973</b>   | Taforalt | Adult human   | 0.69 | 2.6 | 2.5 |
| <b>35974</b>   | Taforalt | Adult human   | 0.71 |     | 2.5 |
| <b>35976</b>   | Taforalt | Adult human   | 0.81 | 2.5 | 2.4 |

|       |          |             |      |  |     |
|-------|----------|-------------|------|--|-----|
| 34561 | Taforalt | Adult human | 0.68 |  | 2.5 |
|-------|----------|-------------|------|--|-----|

883

884 **5.3 Enamel hypoplasia in the human teeth from Taforalt**

885 For zinc isotope analyses, the teeth enamel of the human from Taforalt were sampled in several  
886 parts in order to detect possible dietary variation during the enamel formation (Supplementary  
887 Figure 13). The majority of the teeth show hypoplasia located on the enamel or on the root of the  
888 tooth.

889 Enamel hypoplasia occurs as linear or pitted deformation that represent disruptions during the  
890 formation of enamel.

891 Our results show that there is no correlation between the  $\delta^{66}\text{Zn}$  values recorded on the part of  
892 enamel with hypoplasia and the part with no hypoplasia (Kruskal-Wallis chi-squared = 0.140, df  
893 = 1, p-value = 0.7087) (Supplementary Figure 15). Enamel hypoplasia is sometimes hypothesized  
894 as a sign of malnutrition. Low intake of vitamin D from diet and the lack of exposure to sunlight  
895 could result in the presence of EH <sup>114</sup> $\delta$ . The site is not located in high latitude where the exposure  
896 to sunlight is limited in winter, therefore the most likely explanation for this anomaly among the  
897 population of Taforalt could be related to the fact that the individuals did not consumed a lot of  
898 foods rich in vitamin D such as meat, liver, fish and dairy products. This goes in line with our  
899 isotopic results. Studies on modern populations have found that people of low socio-economic  
900 status have a higher prevalence of enamel hypoplasia than those of higher social status  
901 population<sup>115,116</sup>. This is because the latter had less childhood stress than the former group. In  
902 archaeological samples there is an increase incidence in EH during the transition to agriculture,  
903 associated with a nutrient-poor diet and an increased reliance on cereals<sup>117</sup>.

904 It is important to consider that life expectancy during the Paleolithic period was notably lower than  
905 by today's standards, estimated at an average of just 33 years<sup>118</sup>. In Taforalt, this is evident as many  
906 individuals did not exceed 20 years of age<sup>5</sup>, likely due to several factors including the prevalence  
907 of infectious diseases<sup>4</sup>. Furthermore, dental issues such as caries, tooth wear, periodontal disease,  
908 and the intentional removal of upper central incisors may have impaired mastication. Notably, a  
909 study has suggested that the elevated occurrence of oral pathologies in the Taforalt population  
910 could be indicative of a generally compromised health status, linked to a high prevalence of disease  
911 and increased mortality rates <sup>4</sup>. The absence of a pattern between  $\delta^{66}\text{Zn}$  and the location of EH

912 could be related to the differential timing between the maturation of the enamel and the timing of  
 913 the incorporation of zinc and other elements <sup>113,119</sup>.

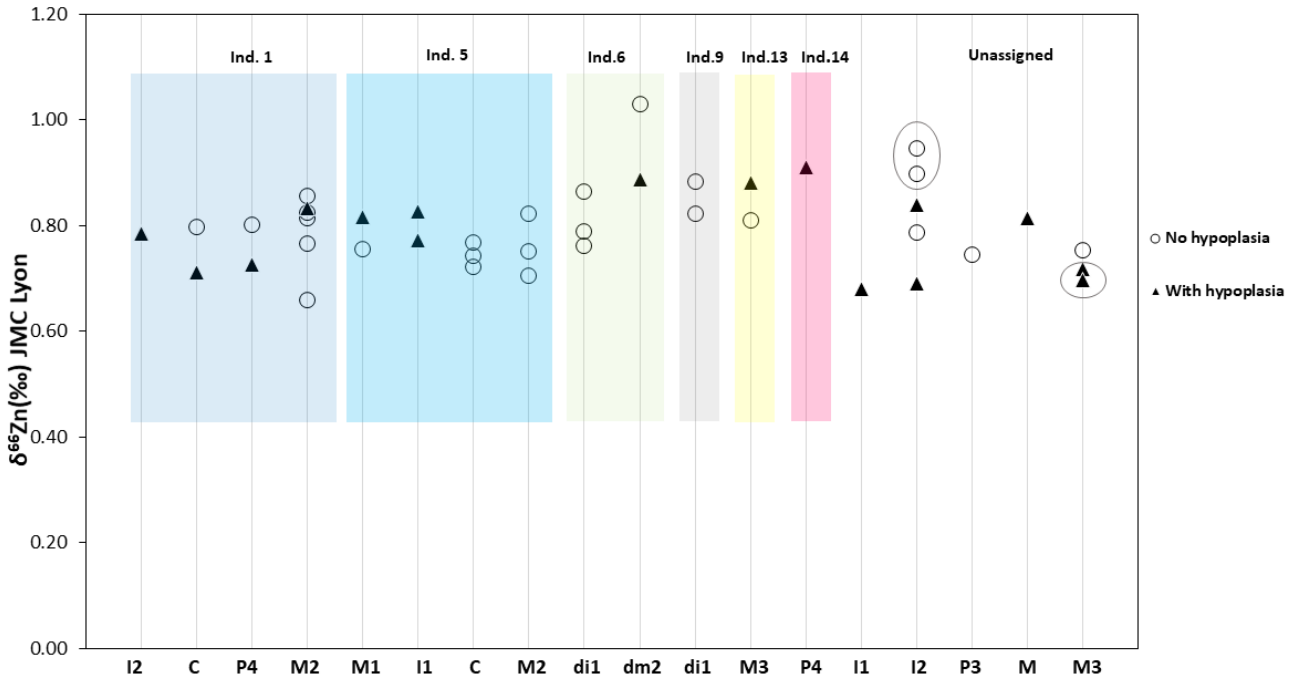

914  
 915 **Supplementary Figure 15:** The zinc isotope ratio for each human tooth sampled from areas with hypoplasia and  
 916 with no hypoplasia. For unassigned teeth, the samples belonging to the same tooth are circled in grey. The x-axis  
 917 corresponds to the tooth type.

918 **5.4 Identified individuals' summaries based on all isotope measurements**

919 **Individual 1: a male individual with a plant-based diet**

920 Most of our human samples come from individual 1, which is a young male as revealed by the  
 921 aDNA<sup>120</sup>. Estimated age at death is 20 years.

922 The range of enamel analyzed for zinc and strontium for this individual is formed between 1 year  
 923 (I2) and 8 years (M2). The zinc isotopic ratio does not show any significant changes during this  
 924 period ( $0.78 \pm 0.05\text{‰}$ ) (Extended Data Figure. 3). On the other hand, collagen  $\delta^{15}\text{N}_{\text{collagen}}$  values  
 925 were obtained from both tooth dentine (5.5-14 years) and bone record different time periods with  
 926 the latter recording the last years of life due to constant bone remodeling. His bone collagen also  
 927 shows the lowest  $\delta^{15}\text{N}_{\text{collagen}}$  value of all analyzed samples. The lowest human TP of 2.2 in Tavoralt  
 928 obtained from the bone collagen of this individual, indicates a predominantly plant-based diet (~20  
 929 years). To our knowledge, this is the lowest TP value ever recorded in a pre-agriculturist



930 population. The teeth collagen of this male, formed earlier in life, recorded higher values than his  
931 bone collagen suggesting a switch to a plant-based diet shortly before his death. Interestingly, 50%  
932 of the remaining teeth of this individual were affected by caries<sup>5</sup>. We should mention that most of  
933 this individual's teeth show evidence of hypoplasia on both the crown and the root (See  
934 PowerPoint). The observation of the hypoplasia on the teeth included in this study indicates that  
935 he suffered from stress from around 3 years (recorded on the I2) until 16 years of age (recorded on  
936 his M2). A possible explanation for this transition to a plant-based diet could be related to a health  
937 condition that led to nutritional stress.

938

### 939 **Individual 5: a female adolescent individual with an intermediate trophic position**

940 Individual 5 is an adolescent female who died between 16 and 18 years of age<sup>5</sup>. The range zinc  
941 isotope values from this individual are obtained from teeth formed between birth (M1) and around  
942 8 years (M2). Zinc isotope ratios also show no significant variation ( $0.77\text{‰}\pm 0.04$ ) similarly to  
943  $\delta^{15}\text{N}_{\text{collagen}}$  values ( $10.34\text{‰}\pm 0.51$ ). We did not obtain the TP from CSIA for this individual because  
944 we could not recover enough collagen for the analyses. The TL based on  $\delta^{66}\text{Zn}$  equation value  
945 suggests 60% of plant consumption. We observed the presence of enamel hypoplasia on the teeth  
946 of this female indicating that she experienced stresses between 2.5 and 5 years. Caries were present  
947 in 57% of the remaining teeth of this individual, in addition to alveolar absorption<sup>4</sup>. The study of  
948 the teeth of this individual also shows that this female had the lowest attrition rates among the  
949 individuals recovered during the recent excavations<sup>5</sup>.

### 950 **Individual 13: a male individual buried with horn cores and who might have increased his** 951 **meat consumption over the course of his life**

952 Individual 13 is a male whose age of death is estimated between 18 and 20 years<sup>5</sup>. His M3, which  
953 started its formation at the approximated age around of 15 and completed at around 20 years<sup>84</sup>  
954 recorded the highest TP (2.6) in the identifiable individuals. This reflects an omnivorous diet with  
955 both meat and plant in his diet. His  $\delta^{15}\text{N}_{\text{collagen}}$  is slightly above the values of the other individuals.  
956 However, his  $\delta^{66}\text{Zn}$  from the third molar is relatively high (0.85‰). It is therefore possible that the  
957 individual increased his meat consumption after the age of 14.5 years old.

958 Interestingly, the burial of this individual was associated with seven horn cores of Barbary sheep  
959 as funerary artifacts in addition to a freshwater snail shell (*Melanopsis sp.*). In addition, 85% of

960 his remaining teeth were affected by caries and periodontal diseases<sup>5</sup>. The presence of enamel  
961 hypoplasia on his teeth indicates that he suffered from stress at around 13 years of age which  
962 coincides with the beginning of the formation of the root of his M3.

963

964 **Individual 14: a male individual with a plant-based diet**

965 Individual 14 is also a male with an age-at death of 18-20 years<sup>5</sup>. No collagen was preserved in  
966 the tooth samples. The tooth enamel of the P4 sampled for the Zn and Sr formed between 3 and  
967 6.5 years, which unlikely reflect breastfeeding. The  $\delta^{66}\text{Zn}$  value of this individual is relatively high  
968 (0.92‰,) indicating an important consumption of plant foods. Moreover, a grindstone and a pestle  
969 were found in his burial. Caries are present in 42% of the remaining teeth of this individual in  
970 addition to alveolar resorption in three teeth. The tooth analyzed for this individual is impressively  
971 full of hypoplasia (Supplementary information 7). This period of stress could extend from around  
972 4 to 10 years of age.

973 **Individual 6: a male infant with an early introduction of solid food in diet**

974 Individual 6 is an infant male that died within the first year of his life (6-12 months)<sup>5</sup>. This infant  
975 had significant TP change during his short life. The deciduous m2 is formed between 18 weeks *in*  
976 *utero* and 3 years. For this individual the root of this tooth was not totally formed (only 1/3 of the  
977 root formed) therefore only reflecting the first year of his life since he died at around 6-12 months.  
978 The tooth has a TP of 2.8 clearly reflecting breastfeeding. Similarly, a high value is recorded on  
979 his long bone collagen (2.9). It is expected for breastfed infants to be one trophic level above the  
980 mother<sup>121</sup>. However, his rib bone collagen TP (2.5) reflects a significant decrease in the trophic  
981 level prior to death. Since rib bones have a faster bone remodeling it is possible that they recorded  
982 the very last period of his infant life. We suggest that for this individual weaning started before the  
983 age of 1 year with an early introduction of adult's foodstuff into his diet. An early weaning is  
984 usually unexpected among hunter-gatherer societies as they have prolonged breastfeeding periods  
985 due to the lack of suitable food for weaning<sup>122</sup>. We propose that plant food could have been used  
986 to wean infants at this site. This sudden change in trophic position was not detected using the  
987  $\delta^{15}\text{N}_{\text{collagen}}$  of the two bones that were analysed for this individual.

988 The beginning of the formation of his di1 shows a relatively lower  $\delta^{66}\text{Zn}$  value (0.76‰) than the  
989 end of the formation of his dm2 (1.03‰). The range of enamel analyzed for zinc and strontium for  
990 this individual reflect a formation period between 18 weeks *in utero* (di1) and 10 months (dm2).

991 We suggest that the deciduous incisor, formed *in utero*, recorded the placental diet coming from  
992 the mother, while the dm2 corresponds to an exclusive breastfeeding. A similar pattern was  
993 observed in the medieval site from France (Rennes, Jacobins convent) where m2 showed higher  
994  $\delta^{66}\text{Zn}$  values<sup>45</sup>.

995 The CT scan on the deciduous first incisor of this infant showed the presence of hypoplasia along  
996 the root (Supplementary information 7, PowerPoint file). This indicates that the stress happened  
997 between 4 and 11 months of his life. The fact that he died around the age of 12 months suggests  
998 that he may not have survived the cause of this stress.

999

1000 **Individual 9: an infant female with an early solid food introduction**

1001 Individual 9 is an infant female as determined by aDNA<sup>5,120</sup> and has an estimated age at death of  
1002 5-6 months. The TP from her bone is 2.7 suggesting at least partial breastfeeding but not as high  
1003 as for Individual 6. The introduction of solid food could therefore have been quite early for this  
1004 individual too, so that it could be recorded in her bones. No hypoplasia was however detected on  
1005 the tooth of this individual.

1006

1007

1008

1009

1010

1011 6 Supplementary information 6: Additional tables and figures

1012 6.1 **Supplementary figures**

1013

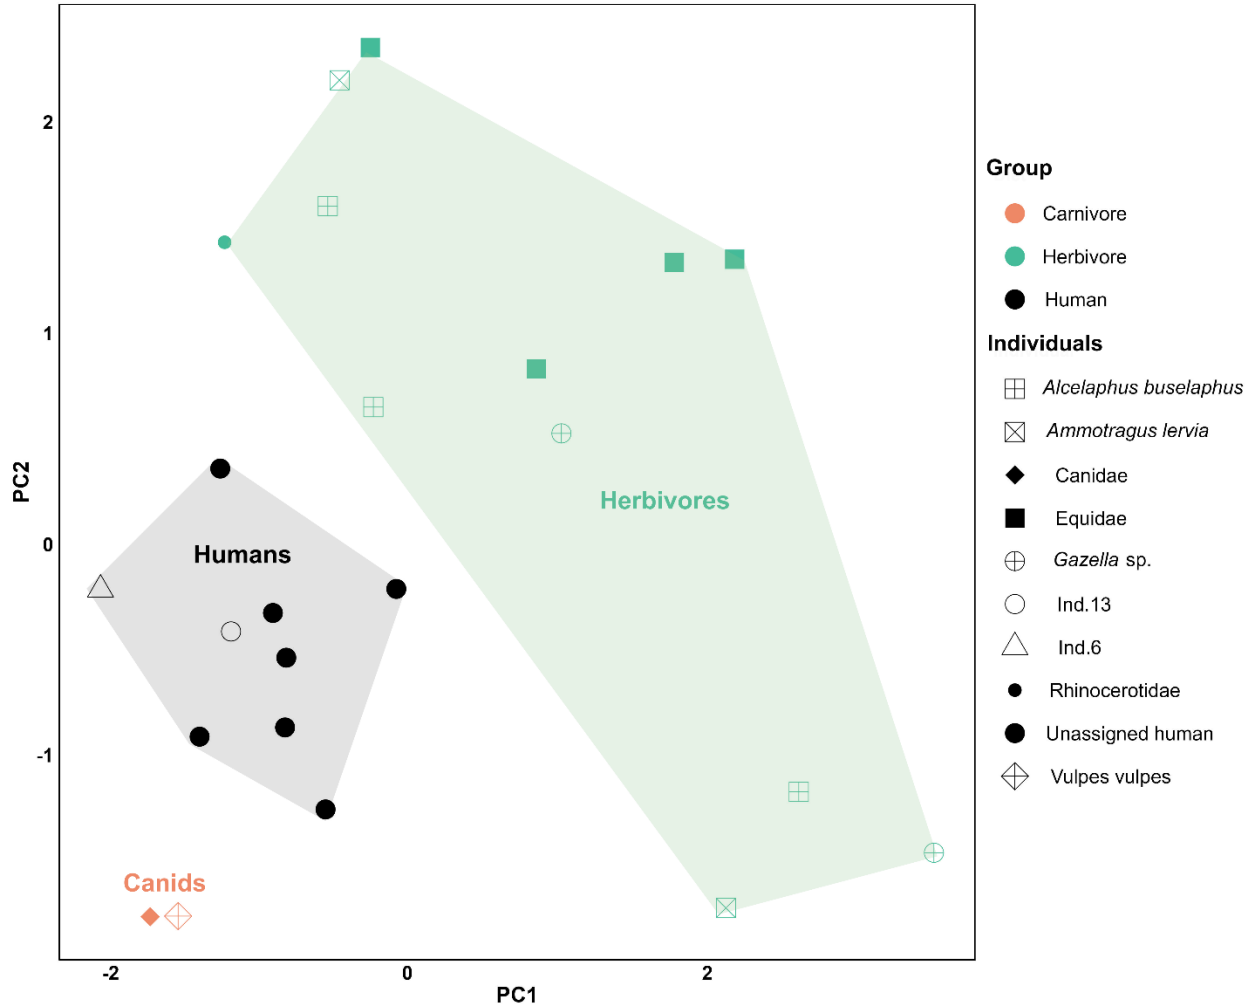

1014

1015 **Supplementary Figure 16:** PCA plot of  $\delta^{13}\text{C}$ ,  $\delta^{15}\text{N}$ ,  $\delta^{15}\text{N}_{\text{Glu}}$ ,  $\delta^{15}\text{N}_{\text{Phe}}$  and  $\delta^{66}\text{Zn}$  values of the human and faunal  
1016 remains of Tavoralt

1017

1018

1019

1020

1021

1022

1023

1024

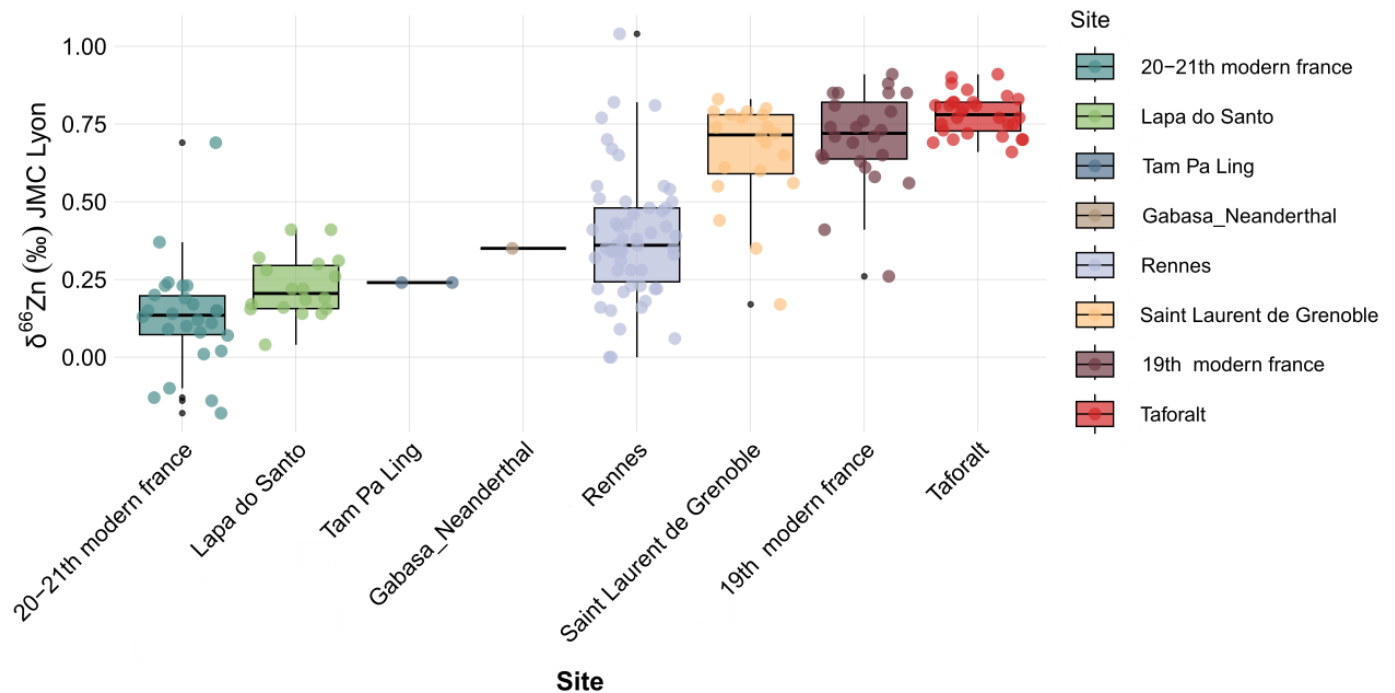

1025

1026 **Supplementary Figure 17:** Boxplot of  $\delta^{66}\text{Zn}$  values from Taforalt compared to published data and showing the  
 1027 highest  $\delta^{66}\text{Zn}$  values recorded for a human population<sup>39,45,48,123,124</sup>. Boxes correspond to the median (centre line) and  
 1028 the first and third quartiles, while whiskers indicate the minimum and maximum values. Each point corresponds to a  
 1029 tooth samples (n= 173).

## 1030 6.2 Tables of the additional excel file

1031 **Supplementary Table 14:** Faunal species examined in Taforalt, along with details on their diet  
 1032 and water consumption

1033 **Supplementary Table 15:** The human individuals from Taforalt included in our study along  
 1034 with their age and gender estimation (ND= Non determined)

1035 **Supplementary Table 16:** Isotopic data of the human remains from Taforalt and the parts  
 1036 sampled for each isotopic analysis.

1037

1038 **Supplementary Table 17:** Isotopic data of the faunal remains from Taforalt and the parts  
 1039 sampled for each isotopic analysis.

1040 **Supplementary Table 18:** The zooarchaeological and the ZooMs identification of the faunal  
 1041 species from Taforalt.

1042 **Supplementary Table 19:** The mean value of the isotopic results for each human individual  
 1043 from Taforalt analysed in this study.

1044 **Supplementary Table 20:** The caries and hypoplasia presence in the analyzed teeth of the  
 1045 humans from Taforalt.

1046 **Supplementary Table 21:** Nitrogen isotope data on amino acids in Taforalt humans and fauna -  
1047 average and standard deviation

1048 **Supplementary Table 22:** Carbon isotope data on amino acids in Taforalt humans and fauna -  
1049 average and standard deviation

1050 **Supplementary Table 23:** Covariance matrix with the calculated eigenvalues for each of the  
1051 features used.

1052 **Supplementary Table 24:** Summary of the number of samples taken per tissue for each isotope  
1053 analysis

1054

1055 7 Supplementary information 7: Extracts of 3D Scans of the human  
1056 teeth (pdf)

1057

1058 8 References:

1059

1060 1. Barton, R. N. E. *et al.* Origins of the Iberomaurusian in NW Africa: New AMS radiocarbon  
1061 dating of the Middle and Later Stone Age deposits at Taforalt Cave, Morocco. *Journal of*  
1062 *Human Evolution* **65**, 266–281 (2013).

1063 2. Barton, R. N. E. *et al.* *Cemeteries and Sedentism in the Later Stone Age of NW Africa:*  
1064 *Excavations at Grotte Des Pigeons, Taforalt, Morocco. Propylaeum* (Monographien des  
1065 Römisch-Germanischen Zentralmuseums, 2020). doi:10.11588/propylaeum.734.

1066 3. Barton, R. N. E. *et al.* Reconsidering the MSA to LSA transition at Taforalt Cave (Morocco)  
1067 in the light of new multi-proxy dating evidence. *Quaternary International* **413**, 36–49  
1068 (2016).

1069 4. Humphrey, L. T. *et al.* Earliest evidence for caries and exploitation of starchy plant foods in  
1070 Pleistocene hunter-gatherers from Morocco. *Proceedings of the National Academy of*  
1071 *Sciences* **111**, 954–959 (2014).

- 1072 5. Humphrey, L., Freyne, A., Berridge, P. & Berridge, P. Human burial evidence. in *Cemeteries*  
1073 *and Sedentism in the Later Stone Age of NW Africa: Excavations at Grotte des Pigeons,*  
1074 *Taforalt, Morocco* (eds. Barton, R. N. E., Bouzouggar, A., Collcutt, S. N. & Humphrey, L.  
1075 T.) 444–482 (Monographien des Römisch-Germanischen Zentralmuseums, 2020).  
1076 doi:10.11588/propylaeum.734.
- 1077 6. Humphrey, L. *et al.* Infant funerary behavior and kinship in Pleistocene hunter-gatherers  
1078 from Morocco. *Journal of Human Evolution* **135**, 102637 (2019).
- 1079 7. Bouzouggar, A. *et al.* Reevaluating the Age of the Iberomaurusian in Morocco. *The African*  
1080 *Archaeological Review* **25**, 3–19 (2008).
- 1081 8. Hogue, J. & Barton, N. New radiocarbon dates for the earliest Later Stone Age microlithic  
1082 technology in Northwest Africa. *Quaternary International* (2016)  
1083 doi:10.1016/j.quaint.2015.11.144.
- 1084 9. Barton, N. *et al.* *Human Burial Evidence from Hattab II Cave and the Question of Continuity*  
1085 *in Late Pleistocene–Holocene Mortuary Practices in Northwest Africa. Cambridge*  
1086 *Archaeological Journal* vol. 18 (2008).
- 1087 10. Barton, R. N. E. *et al.* The Late Upper Palaeolithic Occupation of the Moroccan Northwest  
1088 Maghreb During the Last Glacial Maximum. *Afr Archaeol Rev* **22**, 77–100 (2005).
- 1089 11. Turner, E. Large mammalian faunal assemblages. in *Cemeteries and Sedentism in the Later*  
1090 *Stone Age of NW Africa: Excavations at Grotte des Pigeons, Taforalt, Morocco* (eds. Barton,  
1091 R. N. E., Bouzouggar, A., Collcutt, S. N. & HUMPHREY, L.) 239–308 (Monographien des  
1092 Römisch-Germanischen Zentralmuseums, 2020). doi:10.11588/propylaeum.734.
- 1093 12. Arambourg, C., Boule, M., Valois, H. & Verneau, R. *Les Grottes Paléolithiques Des Beni-*  
1094 *Segoual (Algérie)*. (Masson, 1934).

- 1095 13. Hachi, S. Résultats des fouilles récentes d'Afalou Bou Rmel (Bédjaia, Algérie). in *El món*  
1096 *mediterrani després del pleniglacial (18000-12000 BP)* 77–92 (Museo de Arqueología de  
1097 Cataluña = Museu d'Arqueologia de Catalunya, 1997).
- 1098 14. Desmond, A. *et al.* ZooMS identification of bone tools from the North African Later Stone  
1099 Age. *Journal of Archaeological Science* **98**, 149–157 (2018).
- 1100 15. Minagawa, M. & Wada, E. Stepwise enrichment of  $^{15}\text{N}$  along food chains: Further evidence  
1101 and the relation between  $\delta^{15}\text{N}$  and animal age. *Geochimica et Cosmochimica Acta* **48**, 1135–  
1102 1140 (1984).
- 1103 16. Schoeninger, M. J. & DeNiro, M. J. Nitrogen and carbon isotopic composition of bone  
1104 collagen from marine and terrestrial animals. *Geochimica et Cosmochimica Acta* **48**, 625–  
1105 639 (1984).
- 1106 17. Ambrose, S. H. & DeNiro, M. J. Reconstruction of African human diet using bone collagen  
1107 carbon and nitrogen isotope ratios. *Nature* **319**, 321–324 (1986).
- 1108 18. O'Connell, T., Kneale, C., Tasevska, N. & Kuhnle, G. The diet-body offset in human  
1109 nitrogen isotopic values: a controlled dietary study. *Am J Phys Anthropol* **149**, 426–434  
1110 (2012).
- 1111 19. Schwarcz, H. P. & Schoeninger, M. J. Stable isotope analyses in human nutritional ecology.  
1112 *American Journal of Physical Anthropology* **34**, 283–321 (1991).
- 1113 20. Van Der Merwe, N. J. & Vogel, J. C.  $^{13}\text{C}$  Content of human collagen as a measure of  
1114 prehistoric diet in woodland North America. *Nature* **276**, 815–816 (1978).
- 1115 21. Richards, M. P., Pettitt, P. B., Stiner, M. C. & Trinkaus, E. Stable isotope evidence for  
1116 increasing dietary breadth in the European mid-Upper Paleolithic. *PNAS* **98**, 6528–6532  
1117 (2001).



- 1118 22. Drucker, D. & Bocherens, H. Carbon and nitrogen stable isotopes as tracers of change in diet  
1119 breadth during Middle and Upper Palaeolithic in Europe. *International Journal of*  
1120 *Osteoarchaeology* **14**, 162–177 (2004).
- 1121 23. van Klinken, G. J. Bone Collagen Quality Indicators for Palaeodietary and Radiocarbon  
1122 Measurements. *Journal of Archaeological Science* **26**, 687–695 (1999).
- 1123 24. Ambrose, S. H. Preparation and characterization of bone and tooth collagen for isotopic  
1124 analysis. *Journal of Archaeological Science* **17**, 431–451 (1990).
- 1125 25. Corr, L. T., Sealy, J. C., Horton, M. C. & Evershed, R. P. A novel marine dietary indicator  
1126 utilising compound-specific bone collagen amino acid  $\delta^{13}\text{C}$  values of ancient humans.  
1127 *Journal of Archaeological Science* **32**, 321–330 (2005).
- 1128 26. Hedges, R. E. M. Isotopes and red herrings: comments on Milner et al. and Lidén et al.  
1129 *Antiquity* **78**, 34–37 (2004).
- 1130 27. Heaton, T. H. E., Vogel, J. C., von la Chevallerie, G. & Collett, G. Climatic influence on the  
1131 isotopic composition of bone nitrogen. *Nature* **322**, 822–823 (1986).
- 1132 28. Schwarcz, H. P. & Schoeninger, M. J. Stable Isotopes of Carbon and Nitrogen as Tracers for  
1133 Paleo-Diet Reconstruction. in *Handbook of Environmental Isotope Geochemistry: Vol I* (ed.  
1134 Baskaran, M.) 725–742 (Springer, Berlin, Heidelberg, 2012). doi:10.1007/978-3-642-10637-  
1135 8\_34.
- 1136 29. Deniro, M. J. & Epstein, S. Influence of diet on the distribution of nitrogen isotopes in  
1137 animals. *Geochimica et Cosmochimica Acta* **45**, 341–351 (1981).
- 1138 30. Virginia, R. A. & Delwiche, C. C. Natural  $^{15}\text{N}$  abundance of presumed  $\text{N}_2$ -fixing and non-  
1139  $\text{N}_2$ -fixing plants from selected ecosystems. *Oecologia* **54**, 317–325 (1982).

- 1140 31. Szpak, P., White, C. D., Longstaffe, F. J., Millaire, J.-F. & Sánchez, V. F. V. Carbon and  
1141 Nitrogen Isotopic Survey of Northern Peruvian Plants: Baselines for Paleodietary and  
1142 Paleoeological Studies. *PLOS ONE* **8**, e53763 (2013).
- 1143 32. Codron, J. *et al.* Taxonomic, anatomical, and spatio-temporal variations in the stable carbon  
1144 and nitrogen isotopic compositions of plants from an African savanna. *Journal of*  
1145 *Archaeological Science* **32**, 1757–1772 (2005).
- 1146 33. Ohkouchi, N. *et al.* Advances in the application of amino acid nitrogen isotopic analysis in  
1147 ecological and biogeochemical studies. *Organic Geochemistry* **113**, 150–174 (2017).
- 1148 34. Chikaraishi, Y., Ogawa, N. & Ohkouchi, N. Further evaluation of the trophic level  
1149 estimation based on nitrogen isotopic composition of amino acids. *Earth, Life, and Isotopes*  
1150 37–51 (2010).
- 1151 35. Honch, N. V., McCullagh, J. S. O. & Hedges, R. E. M. Variation of bone collagen amino  
1152 acid  $\delta^{13}\text{C}$  values in archaeological humans and fauna with different dietary regimes:  
1153 Developing frameworks of dietary discrimination. *American Journal of Physical*  
1154 *Anthropology* **148**, 495–511 (2012).
- 1155 36. Colonese, A. C. *et al.* Long-Term Resilience of Late Holocene Coastal Subsistence System  
1156 in Southeastern South America. *PLOS ONE* **9**, e93854 (2014).
- 1157 37. McCormack, J. *et al.* Trophic position of *Otodus megalodon* and great white sharks through  
1158 time revealed by zinc isotopes. *Nature Communications* **13**, 1–10 (2022).
- 1159 38. Bourgon, N. *et al.* Zinc isotopes in Late Pleistocene fossil teeth from a Southeast Asian cave  
1160 setting preserve paleodietary information. *PNAS* **117**, 4675–4681 (2020).

- 1161 39. Jaouen, K. *et al.* A Neandertal dietary conundrum: Insights provided by tooth enamel Zn  
1162 isotopes from Gabasa, Spain. *Proceedings of the National Academy of Sciences* **119**,  
1163 e2109315119 (2022).
- 1164 40. Tacail, T. *et al.* Calcium isotopic patterns in enamel reflect different nursing behaviors  
1165 among South African early hominins. *Science advances* **5**, eaax3250 (2019).
- 1166 41. Martin, J. E., Tacail, T., Braga, J., Cerling, T. E. & Balter, V. Calcium isotopic ecology of  
1167 Turkana Basin hominins. *Nature communications* **11**, 1–7 (2020).
- 1168 42. Martin, J. E., Vance, D. & Balter, V. Magnesium stable isotope ecology using mammal tooth  
1169 enamel. *Proceedings of the National Academy of Sciences* **112**, 430–435 (2015).
- 1170 43. Bourgon, N. *et al.* Trophic ecology of a Late Pleistocene early modern human from tropical  
1171 Southeast Asia inferred from zinc isotopes. *Journal of Human Evolution* **161**, 103075  
1172 (2021).
- 1173 44. Costas-Rodríguez, M., Van Heghe, L. & Vanhaecke, F. Evidence for a possible dietary effect  
1174 on the isotopic composition of Zn in blood via isotopic analysis of food products by multi-  
1175 collector ICP-mass spectrometry†. *Metallomics* **6**, 139–146 (2014).
- 1176 45. Jaouen, K. *et al.* Tracing intensive fish and meat consumption using Zn isotope ratios:  
1177 evidence from a historical Breton population (Rennes, France). *Sci Rep* **8**, 5077 (2018).
- 1178 46. Jaouen, K., Beasley, M., Schoeninger, M., Hublin, J.-J. & Richards, M. P. Zinc isotope ratios  
1179 of bones and teeth as new dietary indicators: results from a modern food web (Koobi Fora,  
1180 Kenya). *Scientific Reports* **6**, 26281 (2016).
- 1181 47. Kohn, M. J., Schoeninger, M. J. & Barker, W. W. Altered states: effects of diagenesis on  
1182 fossil tooth chemistry. *Geochimica et Cosmochimica Acta* **63**, 2737–2747 (1999).

- 1183 48. Jaouen, K. *et al.* Zinc isotope variations in archeological human teeth (Lapa do Santo, Brazil)  
1184 reveal dietary transitions in childhood and no contamination from gloves. *PLOS ONE* **15**,  
1185 e0232379 (2020).
- 1186 49. Cloquet, C., Carignan, J., Lehmann, M. F. & Vanhaecke, F. Variation in the isotopic  
1187 composition of zinc in the natural environment and the use of zinc isotopes in  
1188 biogeosciences: a review. *Anal Bioanal Chem* **390**, 451–463 (2008).
- 1189 50. Maréchal, C. N., Nicolas, E., Douchet, C. & Albarède, F. Abundance of zinc isotopes as a  
1190 marine biogeochemical tracer. *Geochemistry, Geophysics, Geosystems* **1**, (2000).
- 1191 51. Moynier, F., Vance, D., Fujii, T. & Savage, P. The Isotope Geochemistry of Zinc and  
1192 Copper. *Reviews in Mineralogy and Geochemistry* **82**, 543–600 (2017).
- 1193 52. McCormack, J. *et al.* Zinc isotopes from archaeological bones provide reliable trophic level  
1194 information for marine mammals. *Commun Biol* **4**, 1–11 (2021).
- 1195 53. Jaouen, K., Szpak, P. & Richards, M. P. Zinc Isotope Ratios as Indicators of Diet and  
1196 Trophic Level in Arctic Marine Mammals. *PLoS One* **11**, e0152299 (2016).
- 1197 54. Balter, V. *et al.* Bodily variability of zinc natural isotope abundances in sheep. *Rapid*  
1198 *Commun Mass Spectrom* **24**, 605–612 (2010).
- 1199 55. Balter, V. *et al.* Contrasting Cu, Fe, and Zn isotopic patterns in organs and body fluids of  
1200 mice and sheep, with emphasis on cellular fractionation. *Metallomics* **5**, 1470–1482 (2013).
- 1201 56. Moynier, F., Fujii, T., Shaw, A. S. & Le Borgne, M. Heterogeneous distribution of natural  
1202 zinc isotopes in mice. *Metallomics* **5**, 693–699 (2013).
- 1203 57. Mahan, B., Moynier, F., Jørgensen, A. L., Habekost, M. & Siebert, J. Examining the  
1204 homeostatic distribution of metals and Zn isotopes in Göttingen minipigs. *Metallomics* **10**,  
1205 1264–1281 (2018).

- 1206 58. Moynier, F. *et al.* Isotopic fractionation and transport mechanisms of Zn in plants. *Chemical*  
1207 *Geology* **267**, 125–130 (2009).
- 1208 59. Viers, J. *et al.* Evidence of Zn isotopic fractionation in a soil–plant system of a pristine  
1209 tropical watershed (Nsimi, Cameroon). *Chemical Geology* **239**, 124–137 (2007).
- 1210 60. Fuller, B. T., Richards, M. P. & Mays, S. A. Stable carbon and nitrogen isotope variations in  
1211 tooth dentine serial sections from Wharram Percy. *Journal of Archaeological Science* **30**,  
1212 1673–1684 (2003).
- 1213 61. Bentley, A. Strontium Isotopes from the Earth to the Archaeological Skeleton: A Review. *J*  
1214 *Archaeol Method Theory* **13**, 135–187 (2006).
- 1215 62. Price, T. D., Burton, J. H. & Bentley, R. A. The Characterization of Biologically Available  
1216 Strontium Isotope Ratios for the Study of Prehistoric Migration. *Archaeometry* **44**, 117–135  
1217 (2002).
- 1218 63. Marie, P. J., Ammann, P., Boivin, G. & Rey, C. Mechanisms of action and therapeutic  
1219 potential of strontium in bone. *Calcif Tissue Int* **69**, 121–129 (2001).
- 1220 64. Craig, O. E., Ross, R., Andersen, S. H., Milner, N. & Bailey, G. N. Focus: sulphur isotope  
1221 variation in archaeological marine fauna from northern Europe. *Journal of Archaeological*  
1222 *Science* **33**, 1642–1646 (2006).
- 1223 65. Nehlich, O. The application of sulphur isotope analyses in archaeological research: A  
1224 review. *Earth-Science Reviews* **142**, 1–17 (2015).
- 1225 66. Rees, C. E., Jenkins, W. J. & Monster, J. The sulphur isotopic composition of ocean water  
1226 sulphate. *Geochimica et Cosmochimica Acta* **42**, 377–381 (1978).
- 1227 67. Thode, G., H. Sulphur Isotopes in Nature and the Environment: An Overview. in (2005).

- 1228 68. Kusakabe, M., Rafter, T. A., Stout, J. D. & Collie, T. W. Sulphur isotopic variations in  
1229 nature. *New Zealand Journal of Science* **19**, 433–440 (1976).
- 1230 69. Trust, B. A. & Fry, B. Stable sulphur isotopes in plants: a review. *Plant, Cell & Environment*  
1231 **15**, 1105–1110 (1992).
- 1232 70. Richards, M. P., Fuller, B. T., Sponheimer, M., Robinson, T. & Ayliffe, L. Sulphur isotopes  
1233 in palaeodietary studies: a review and results from a controlled feeding experiment.  
1234 *International Journal of Osteoarchaeology* **13**, 37–45 (2003).
- 1235 71. Tcherkez, G. & Tea, I. 32S/34S isotope fractionation in plant sulphur metabolism. *New*  
1236 *Phytologist* **200**, 44–53 (2013).
- 1237 72. Webb, E. C. *et al.* Sulphur-isotope compositions of pig tissues from a controlled feeding  
1238 study. *STAR: Science & Technology of Archaeological Research* **3**, 71–79 (2017).
- 1239 73. Wilman, H. *et al.* EltonTraits 1.0: Species-level foraging attributes of the world’s birds and  
1240 mammals. *Ecology* **95**, 2027–2027 (2014).
- 1241 74. Mimoun, J. & Nouira, S. Food habits of the aoudad *Ammotragus lervia* in the Bou Hedma  
1242 mountains, Tunisia. *South African Journal of Science* **Volume 111**, (2015).
- 1243 75. Loggers, C. Forage availability versus seasonal diets, as determined by fecal analysis, of  
1244 dorcas gazelles in Morocco. **55**, 255–268 (1991).
- 1245 76. Herrera-Sánchez, F. J. *et al.* Identifying priority conservation areas in a Saharan environment  
1246 by highlighting the endangered Cuvier’s Gazelle as a flagship species. *Sci Rep* **10**, 8241  
1247 (2020).
- 1248 77. Estes, R. *The Behavior Guide to African Mammals : Including Hoofed Mammals,*  
1249 *Carnivores, Primates.* (Berkeley : University of California Press, 1991).

- 1250 78. Gray, G. G. & Simpson, C. D. *Ammotragus lervia*. *Mammalian Species* 1–7 (1980)  
1251 doi:10.2307/3504009.
- 1252 79. Ash, A. *et al.* Regional differences in health, diet and weaning patterns amongst the first  
1253 Neolithic farmers of central Europe. *Sci Rep* **6**, 29458 (2016).
- 1254 80. Ogilvie, M. D., Curran, B. K. & Trinkaus, E. Incidence and patterning of dental enamel  
1255 hypoplasia among the Neandertals. *American Journal of Physical Anthropology* **79**, 25–41  
1256 (1989).
- 1257 81. Clayton, F., Sealy, J. & Pfeiffer, S. Weaning age among foragers at Matjes river rock shelter,  
1258 South Africa, from stable nitrogen and carbon isotope analyses. *American Journal of*  
1259 *Physical Anthropology* **129**, 311–317 (2006).
- 1260 82. Wright, J. T. Enamel Phenotypes: Genetic and Environmental Determinants. *Genes (Basel)*  
1261 **14**, 545 (2023).
- 1262 83. Bocquentin, F. Pratiques funéraires, paramètres biologiques et identités culturelles au  
1263 Natoufien : une analyse archéo-anthropologique. (Université Bordeaux 1, 2003).
- 1264 84. AlQahtani, S. j., Hector, M. p. & Liversidge, H. m. Brief communication: The London atlas  
1265 of human tooth development and eruption. *American Journal of Physical Anthropology* **142**,  
1266 481–490 (2010).
- 1267 85. Reade, H., Stevens, R. E., Barker, G. & O’Connell, T. C. Tooth enamel sampling strategies  
1268 for stable isotope analysis: Potential problems in cross-method data comparisons. *Chemical*  
1269 *Geology* **404**, 126–135 (2015).
- 1270 86. Bryant, J. D., Froelich, P. N., Showers, W. J. & Genna, B. J. A Tale of Two Quarries:  
1271 Biologic and Taphonomic Signatures in the Oxygen Isotope Composition of Tooth Enamel  
1272 Phosphate from Modern and Miocene Equids. *PALAIOS* **11**, 397–408 (1996).

- 1273 87. Fricke, H. C. & O'Neil, J. R. Inter- and intra-tooth variation in the oxygen isotope  
1274 composition of mammalian tooth enamel phosphate: implications for palaeoclimatological  
1275 and palaeobiological research. *Palaeogeography, Palaeoclimatology, Palaeoecology* **126**,  
1276 91–99 (1996).
- 1277 88. Linhart, S. B. Dentition and Pelage in the Juvenile Red Fox (*Vulpes vulpes*). *Journal of*  
1278 *Mammalogy* **49**, 526–528 (1968).
- 1279 89. Dauphin, Y. & Williams, C. T. Diagenetic trends of dental tissues. *Comptes Rendus Palevol*  
1280 **3**, 583–590 (2004).
- 1281 90. Reynard, B. & Balter, V. Trace elements and their isotopes in bones and teeth: Diet,  
1282 environments, diagenesis, and dating of archeological and paleontological samples.  
1283 *Palaeogeography, Palaeoclimatology, Palaeoecology* **416**, 4–16 (2014).
- 1284 91. Weiss, D. J. *et al.* Isotopic discrimination of zinc in higher plants. *New Phytologist* **165**, 703–  
1285 710 (2005).
- 1286 92. McCormack, J. *et al.* Combining collagen extraction with mineral Zn isotope analyses from a  
1287 single sample for robust palaeoecological investigations. *Archaeol Anthropol Sci* **14**, 137  
1288 (2022).
- 1289 93. Bataille, C. P. *et al.* Triple sulfur-oxygen-strontium isotopes probabilistic geographic  
1290 assignment of archaeological remains using a novel sulfur isoscape of western Europe. *PLOS*  
1291 *ONE* **16**, e0250383 (2021).
- 1292 94. Guiry, E. J. & Szpak, P. Quality control for modern bone collagen stable carbon and nitrogen  
1293 isotope measurements. *Methods in Ecology and Evolution* **11**, 1049–1060 (2020).



- 1294 95. O’Connell, T. C., Kneale, C. J., Tasevska, N. & Kuhnle, G. G. C. The diet-body offset in  
1295 human nitrogen isotopic values: a controlled dietary study. *Am J Phys Anthropol* **149**, 426–  
1296 434 (2012).
- 1297 96. Bocherens, H. & Drucker, D. Trophic level isotopic enrichment of carbon and nitrogen in  
1298 bone collagen: case studies from recent and ancient terrestrial ecosystems. *International*  
1299 *Journal of osteoarchaeology* **13**, 46–53 (2003).
- 1300 97. Ambrose, S. H. Controlled Diet and Climate Experiments on Nitrogen Isotope Ratios of  
1301 Rats. in *Biogeochemical Approaches to Paleodietary Analysis* (eds. Ambrose, S. H. &  
1302 Katzenberg, M. A.) 243–259 (Springer US, Boston, MA, 2002). doi:10.1007/0-306-47194-  
1303 9\_12.
- 1304 98. Lee-Thorp, J., Vaughan, A., Ditchfield, P. & Humphrey, L. T. Isotope ecology of the Sector  
1305 10 burials. in *Propylaeum* (eds. Barton, R. N. E., Bouzouggar, A., Collcutt, S. N. &  
1306 Humphrey, L. T.) (Monographien des Römisch-Germanischen Zentralmuseums, 2020).  
1307 doi:10.11588/propylaeum.734.
- 1308 99. Fahy, G. E., Deter, C., Pitfield, R., Miskiewicz, J. J. & Mahoney, P. Bone deep: variation in  
1309 stable isotope ratios and histomorphometric measurements of bone remodelling within adult  
1310 humans. *Journal of Archaeological Science* **87**, 10–16 (2017).
- 1311 100. Jaouen, K. *et al.* Exceptionally high  $\delta^{15}\text{N}$  values in collagen single amino acids confirm  
1312 Neandertals as high-trophic level carnivores. *PNAS* **116**, 4928–4933 (2019).
- 1313 101. O’Connell, T. C. & Collins, M. J. Comment on “Ecological niche of Neanderthals from  
1314 Spy Cave revealed by nitrogen isotopes of individual amino acids in collagen” [J. Hum.  
1315 Evol. 93 (2016) 82–90]. *Journal of Human Evolution* **117**, 53–55 (2018).

- 1316 102. Ma, Y. *et al.* Aminoisoscapes and palaeodiet reconstruction: New perspectives on millet-  
1317 based diets in China using amino acid  $\delta^{13}\text{C}$  values. *Journal of Archaeological Science* **125**,  
1318 105289 (2021).
- 1319 103. Cheung, C., Herrscher, E. & Thomas, A. Compound specific isotope evidence points to  
1320 use of freshwater resources as weaning food in Middle Neolithic Paris Basin. *American*  
1321 *Journal of Biological Anthropology* **179**, 118–133 (2022).
- 1322 104. Choy, K., Smith, C. I., Fuller, B. T. & Richards, M. P. Investigation of amino acid  $\delta^{13}\text{C}$   
1323 signatures in bone collagen to reconstruct human palaeodiets using liquid chromatography–  
1324 isotope ratio mass spectrometry. *Geochimica et Cosmochimica Acta* **74**, 6093–6111 (2010).
- 1325 105. Mora, A., Pacheco, A., Roberts, C. & Smith, C. Pica 8: Refining dietary reconstruction  
1326 through amino acid  $\delta^{13}\text{C}$  analysis of tendon collagen and hair keratin. *Journal of*  
1327 *Archaeological Science* **93**, 94–109 (2018).
- 1328 106. Thorp, J. H. & Bowes, R. E. Carbon Sources in Riverine Food Webs: New Evidence  
1329 from Amino Acid Isotope Techniques. *Ecosystems* **20**, 1029–1041 (2017).
- 1330 107. Chikaraishi, Y., Ogawa, N. & Ohkouchi, N. Further evaluation of the trophic level  
1331 estimation based on nitrogen isotopic composition of amino acids. *Earth, Life, and Isotopes*  
1332 37–51 (2010).
- 1333 108. Drucker, D. G. *et al.* Isotopic analyses suggest mammoth and plant in the diet of the  
1334 oldest anatomically modern humans from far southeast Europe. *Sci Rep* **7**, 6833 (2017).
- 1335 109. Naito, Y. I. *et al.* Ecological niche of Neanderthals from Spy Cave revealed by nitrogen  
1336 isotopes of individual amino acids in collagen. *Journal of Human Evolution* **93**, 82–90  
1337 (2016).

- 1338 110. Jhala, Y. & Moehlman, P. Golden jackal (*Canis aureus*). *Canids: Foxes, Wolves, Jackals*  
1339 *and Dogs* 156–161 (2004).
- 1340 111. Drake, N. A., Eckardt, F. D. & White, H., Kevin. Sources of sulphur in gypsiferous  
1341 sediments and crusts and pathways of gypsum redistribution in southern Tunisia. *Earth*  
1342 *Surface Processes and Landforms* **29**, 1459–1471 (2004).
- 1343 112. Flentje, H. *et al.* Identification and monitoring of Saharan dust: An inventory  
1344 representative for south Germany since 1997. *Atmospheric Environment* **109**, 87–96 (2015).
- 1345 113. Passey, B. H. *et al.* Inverse methods for estimating primary input signals from time-  
1346 averaged isotope profiles. *Geochimica et Cosmochimica Acta* **69**, 4101–4116 (2005).
- 1347 114. Fulton, A., Amlani, M. & Parekh, S. Oral manifestations of vitamin D deficiency in  
1348 children. *Br Dent J* **228**, 515–518 (2020).
- 1349 115. Nakayama, N. The Relationship Between Linear Enamel Hypoplasia and Social Status in  
1350 18th to 19th Century Edo, Japan. *International Journal of Osteoarchaeology* **26**, 1034–1044  
1351 (2016).
- 1352 116. Saunders, S. R. & Keenleyside, A. Enamel hypoplasia in a Canadian historic sample.  
1353 *American Journal of Human Biology* **11**, 513–524 (1999).
- 1354 117. Bocquentin, F., Chamel, B., Anton, M. & Noûs, C. The Subsistence and Foodways  
1355 Transition during the Neolithization Process. Glimpses from a Contextualized Dental  
1356 Perspective. *Food and History* **19**, 23–52 (2021).
- 1357 118. Goldman, L. Three Stages of Health Encounters Over 8000 Human Generations and How  
1358 They Inform Future Public Health. *Am J Public Health* **108**, 60–62 (2018).
- 1359 119. Tacail, T. *et al.* Assessing human weaning practices with calcium isotopes in tooth  
1360 enamel. *PNAS* **114**, 6268–6273 (2017).

- 1361 120. van de Loosdrecht, M. *et al.* Pleistocene North African genomes link Near Eastern and  
1362 sub-Saharan African human populations. *Science* **360**, 548–552 (2018).
- 1363 121. Fuller, B. t., Fuller, J. l., Harris, D. a. & Hedges, R. e. m. Detection of breastfeeding and  
1364 weaning in modern human infants with carbon and nitrogen stable isotope ratios. *American*  
1365 *Journal of Physical Anthropology* **129**, 279–293 (2006).
- 1366 122. Richards, M., Pearson, J., Molleson, T., Russell, N. & Martin, L. Stable Isotope Evidence  
1367 of Diet at Neolithic Çatalhöyük, Turkey. *Journal of Archaeological Science* **30**, (2003).
- 1368 123. Bourgon, N. *et al.* Trophic ecology of a Late Pleistocene early modern human from  
1369 tropical Southeast Asia inferred from zinc isotopes. *Journal of Human Evolution* **161**,  
1370 103075 (2021).
- 1371 124. Jaouen, K., Herrscher, E. & Balter, V. Copper and zinc isotope ratios in human bone and  
1372 enamel. *Am J Phys Anthropol* **162**, 491–500 (2017).

1373  
1374  
1375  
1376  
1377  
1378  
1379  
1380  
1381  
1382  
1383  
1384  
1385  
1386

1387

1388

1389

1390

1391

1392

1393

1394

1395 **Supplementary Information 7: 3D models of the human teeth and sampling strategy**

1396

SEVA: 35965

Ind: 6

URdi1

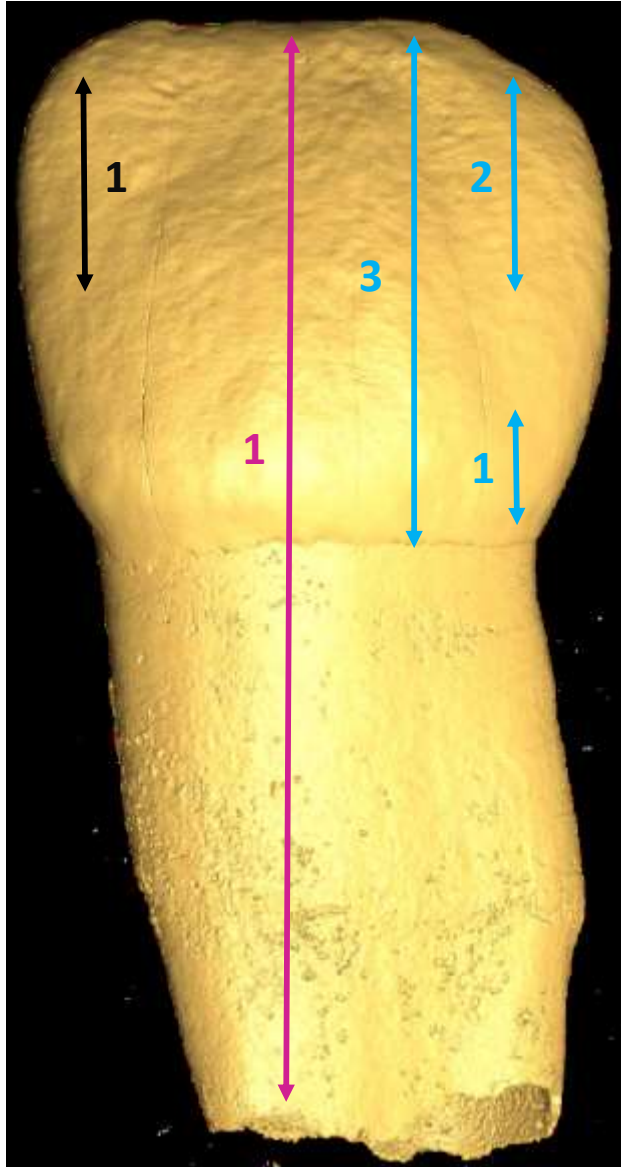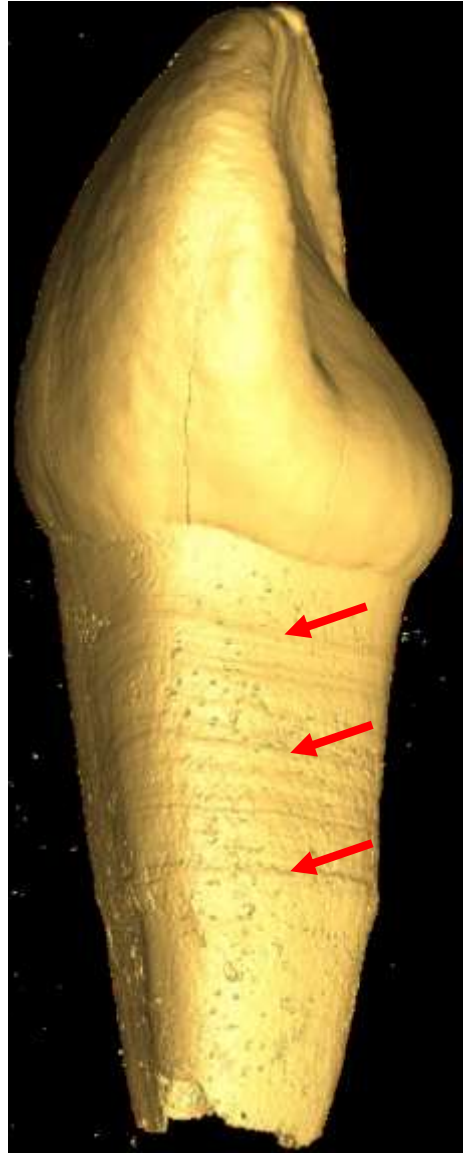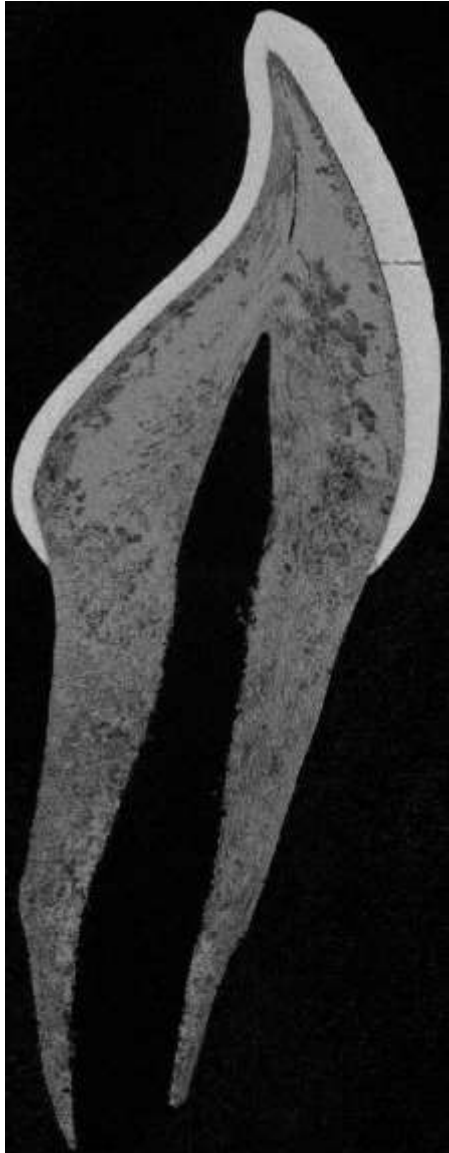

Black: Strontium isotope

Blue: Zinc isotope

Purple: Collagen

Red: Hypoplasia

Note: Many stress on the root

SEVA: 35964

Ind: 6

URdm2

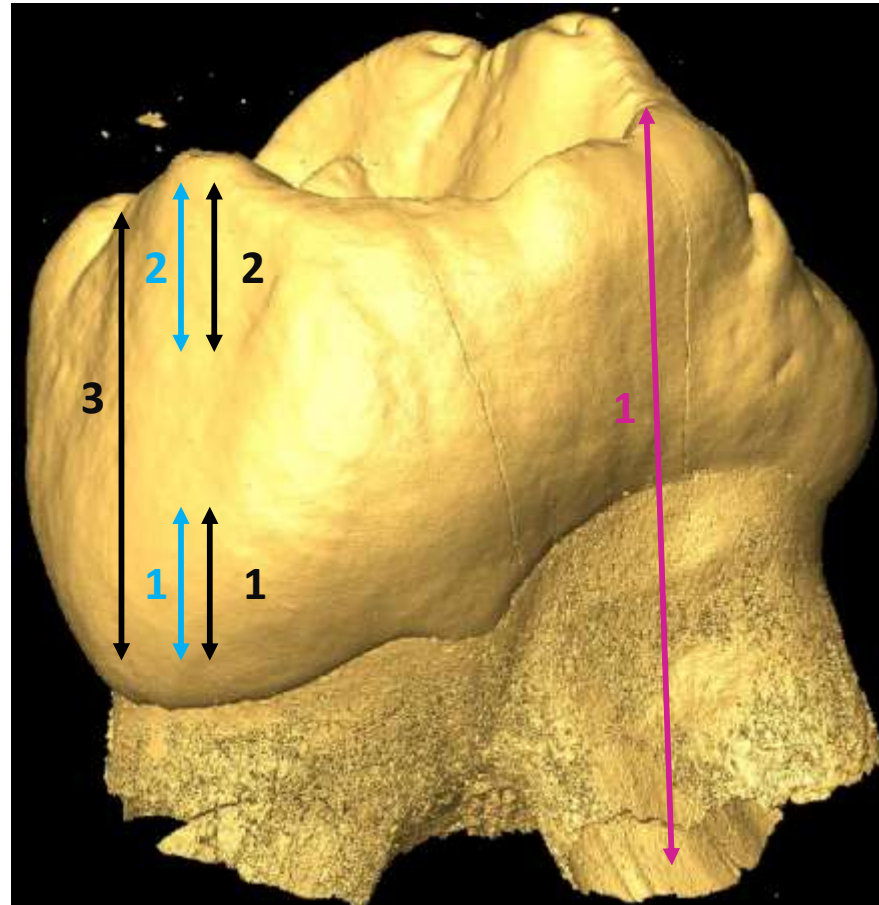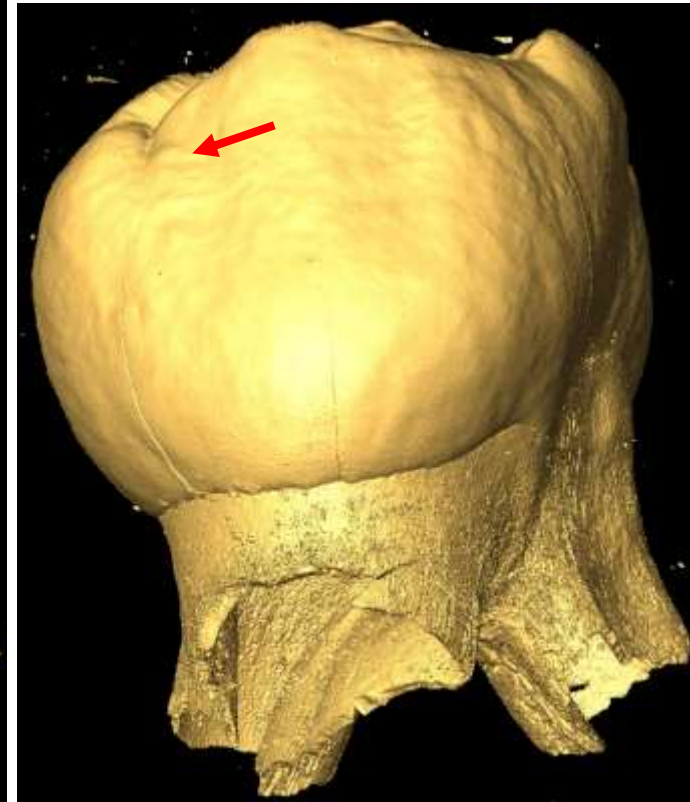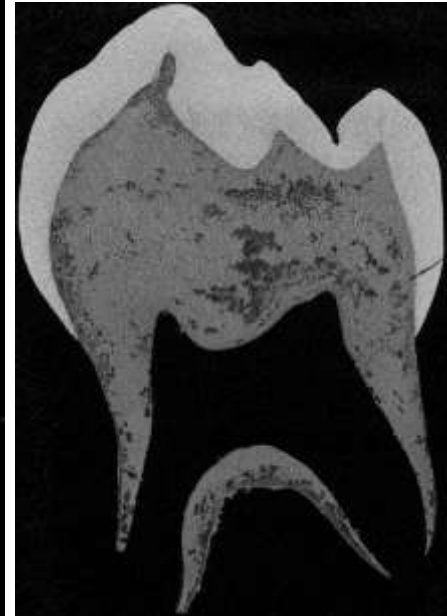

Black: Strontium isotope

Blue: Zinc isotope

Purple: Collagen

Red: Hypoplasia



# SEVA: 35960

Ind: Unassigned

Black: Strontium isotope

Blue: Zinc isotope

Purple: Collagen

Red: Hypoplasia

Yellow: recrystallisation

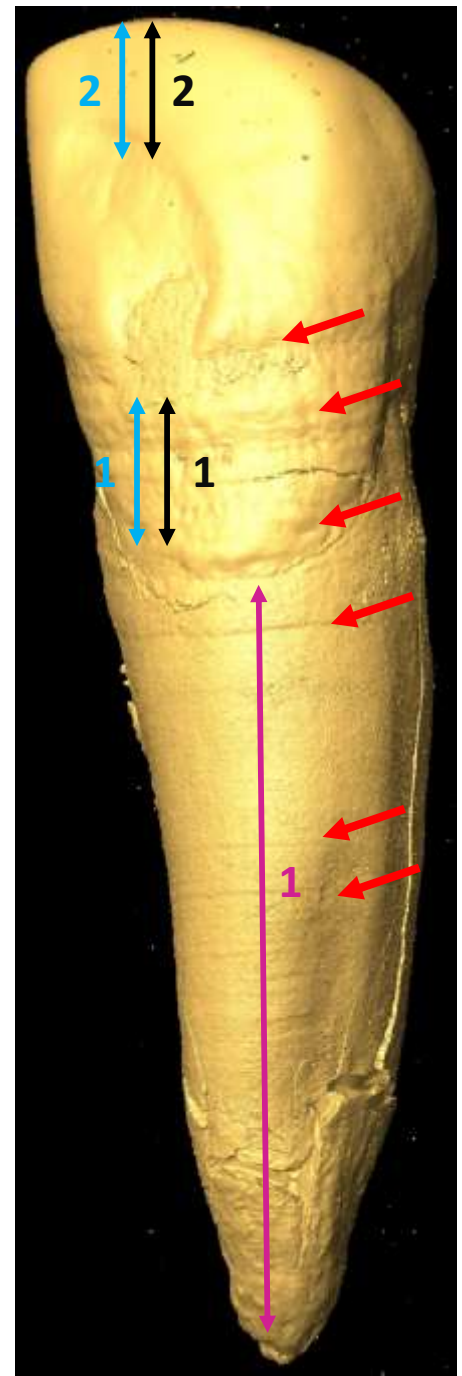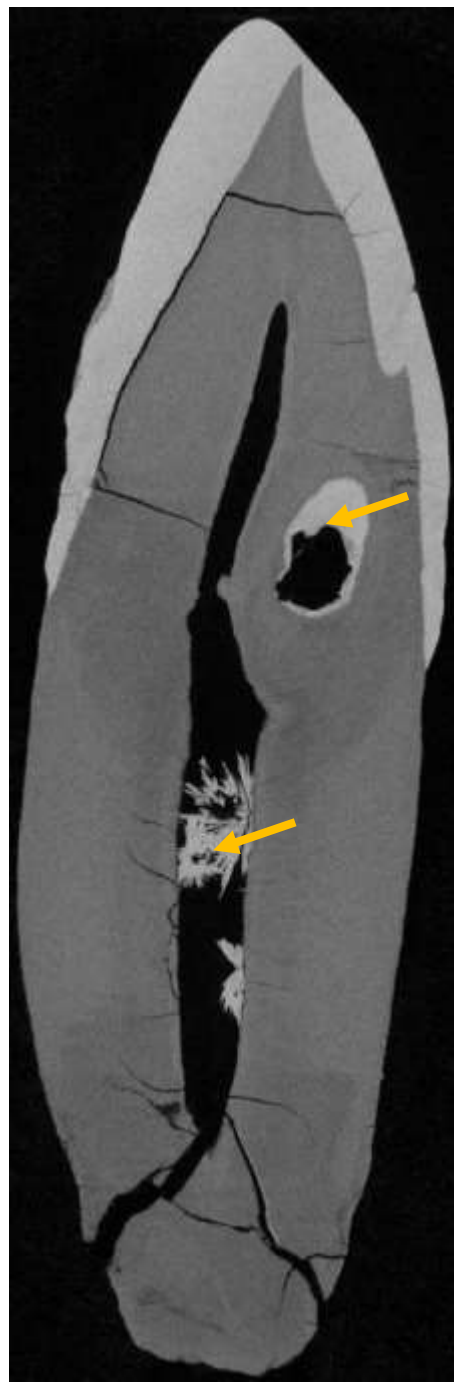

# 35963.B

Ind. 1

Black: Strontium isotope

Blue: Zinc isotope

Purple: Collagen

Red: Hypoplasia

Green: Caries

\_LLM2

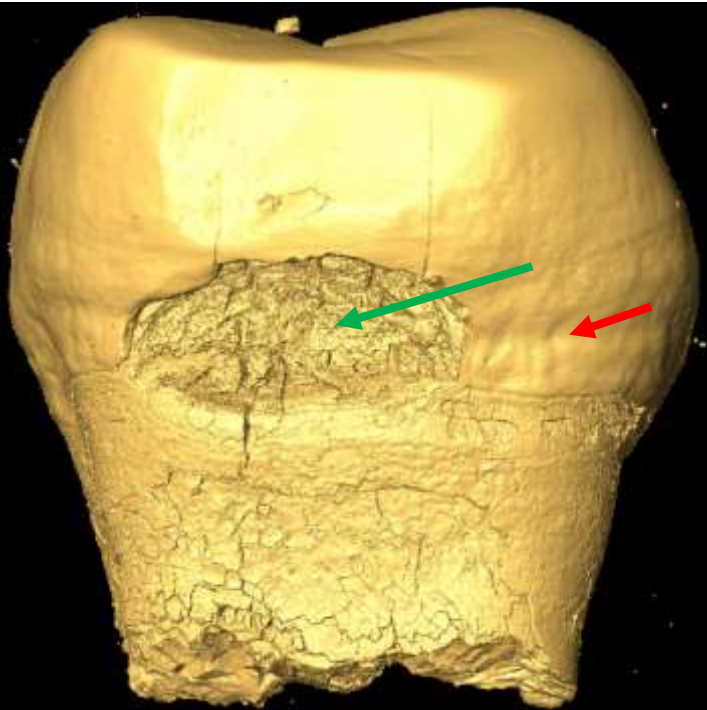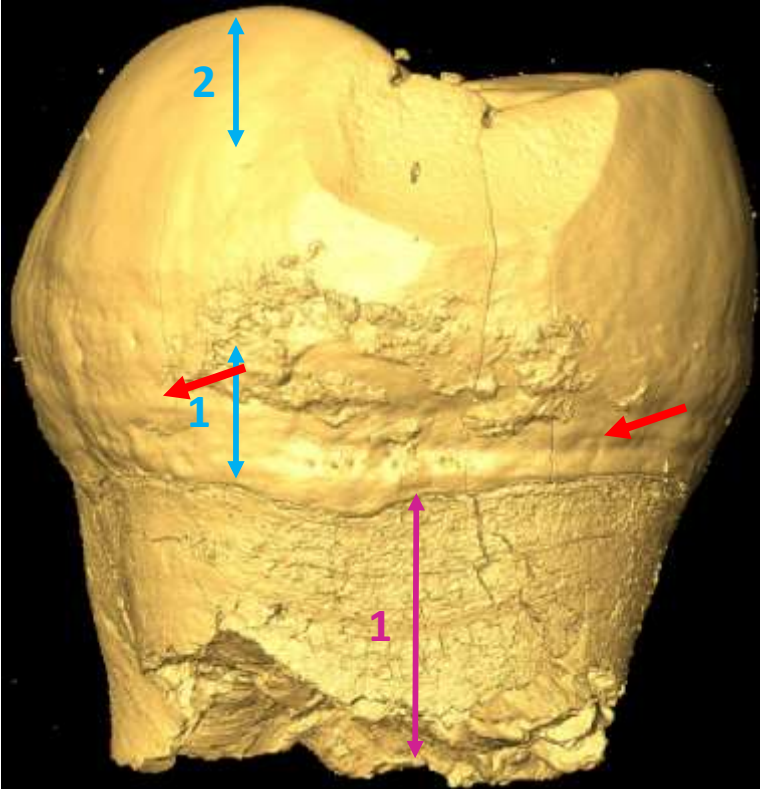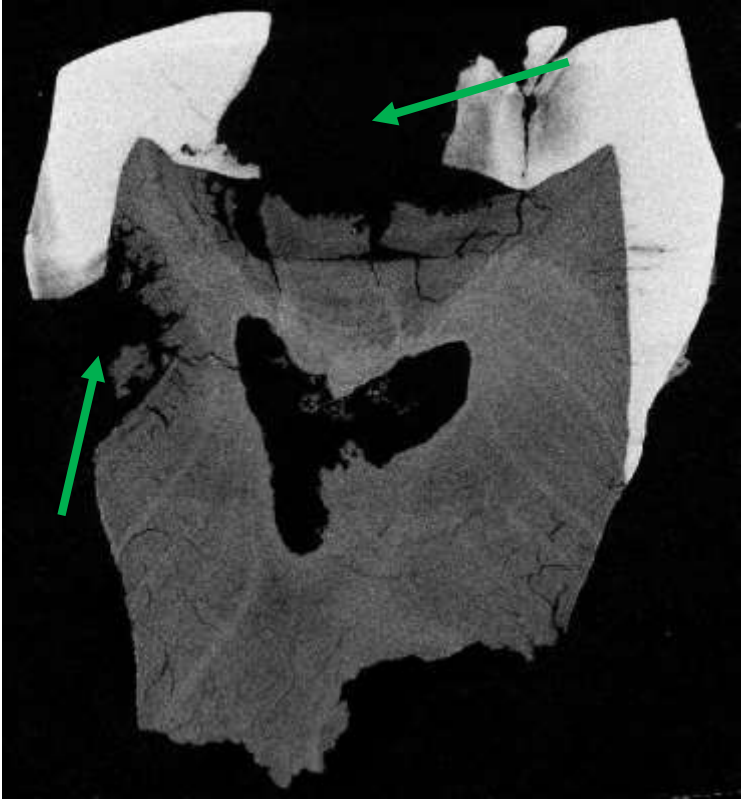

35961

Ind. 1

ULM2

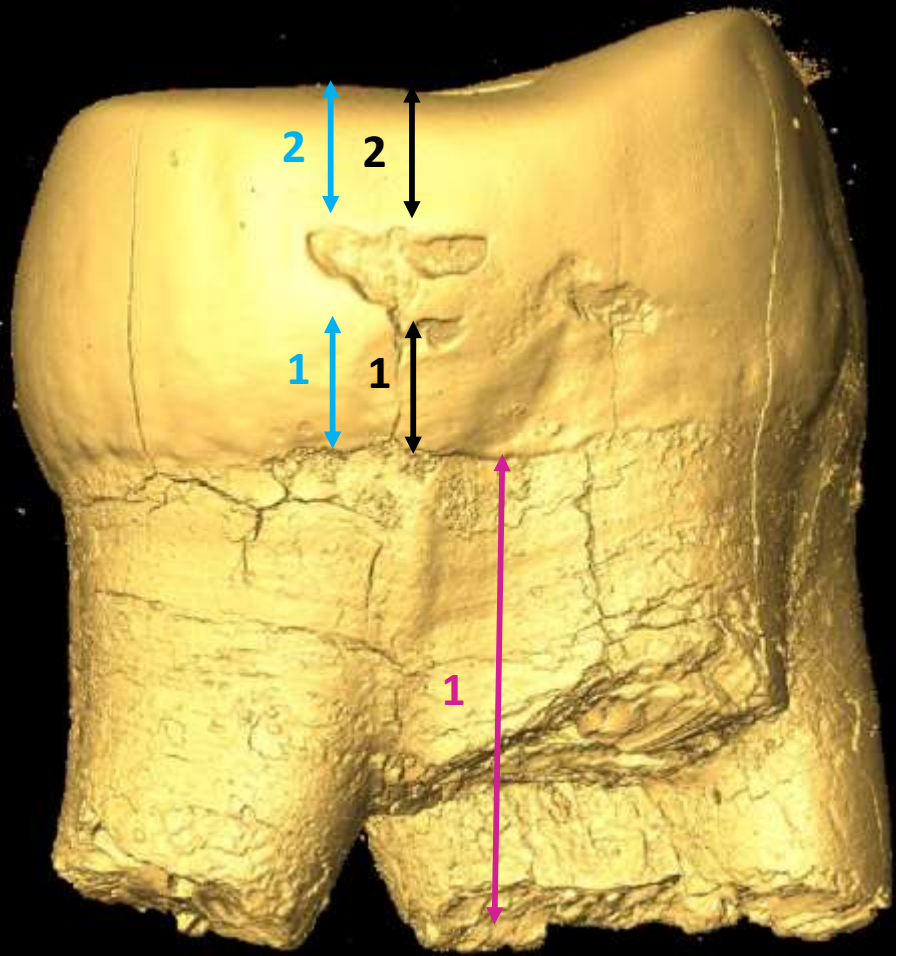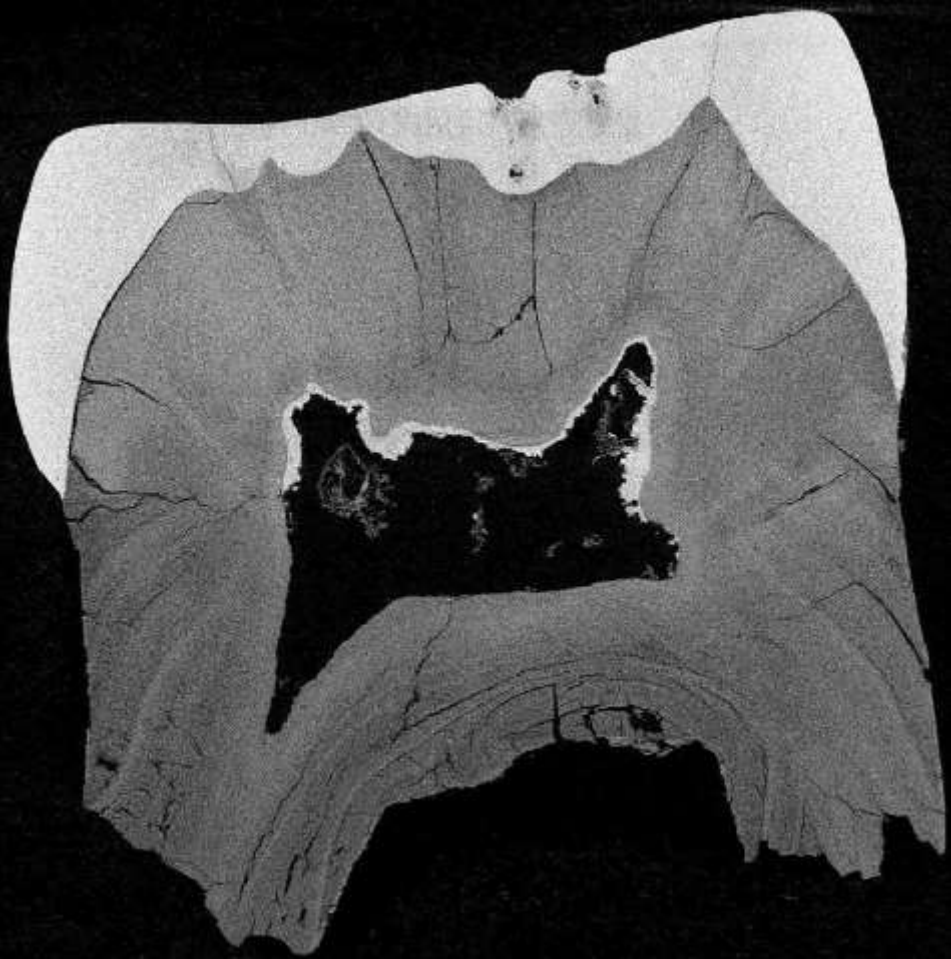

Black: Strontium isotope

Blue: Zinc isotope

Purple: Collagen

Note: Tooth full of stress

35966

Ind. 9

URdi1

Black: Strontium isotope

Blue: Zinc isotope

Purple: Collagen

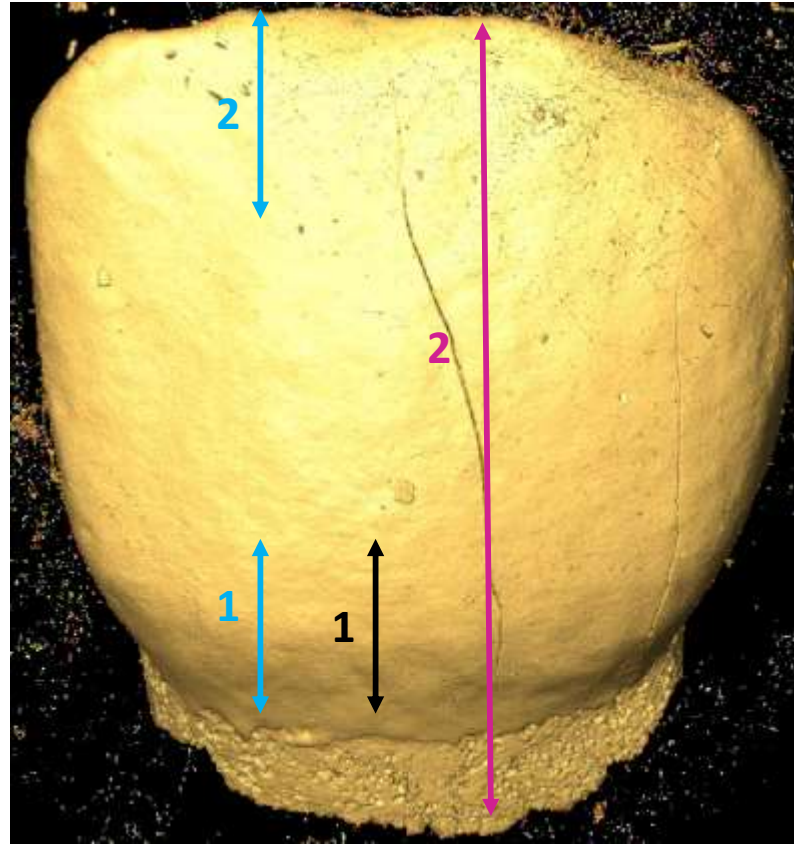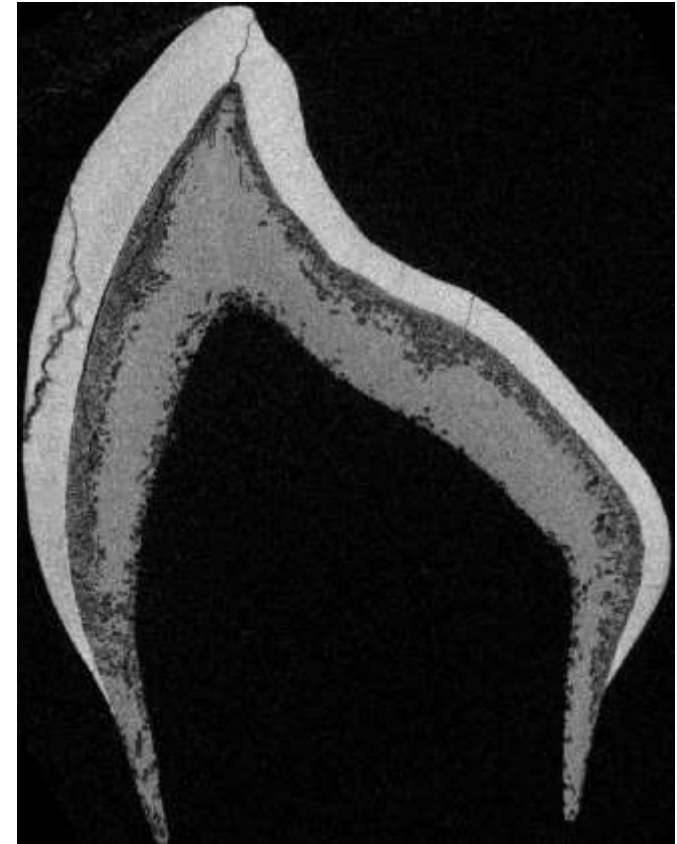

# 35963.A

Ind. 1

Black: Strontium isotope

Blue: Zinc isotope

Purple: Collagen

Red: Hypoplasia

Note: tooth full of stress

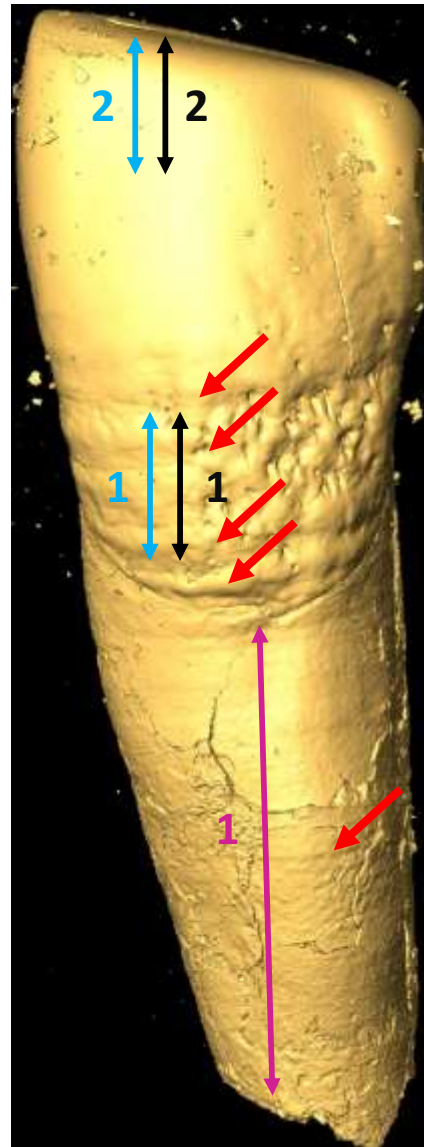

LLC

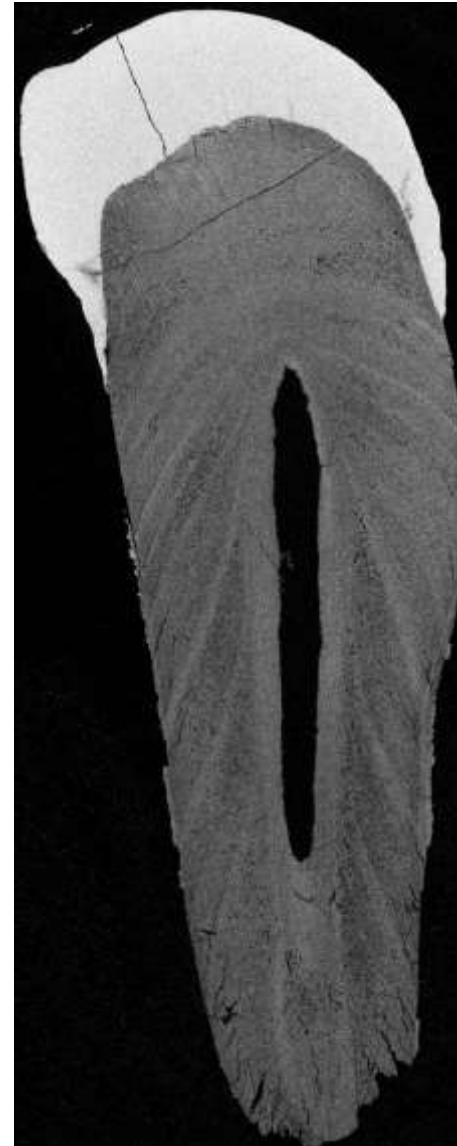

35962

LLM2

Ind. 1

Black: Strontium isotope

Blue: Zinc isotope

Purple: Collagen

Red: Hypoplasia

Green: Caries

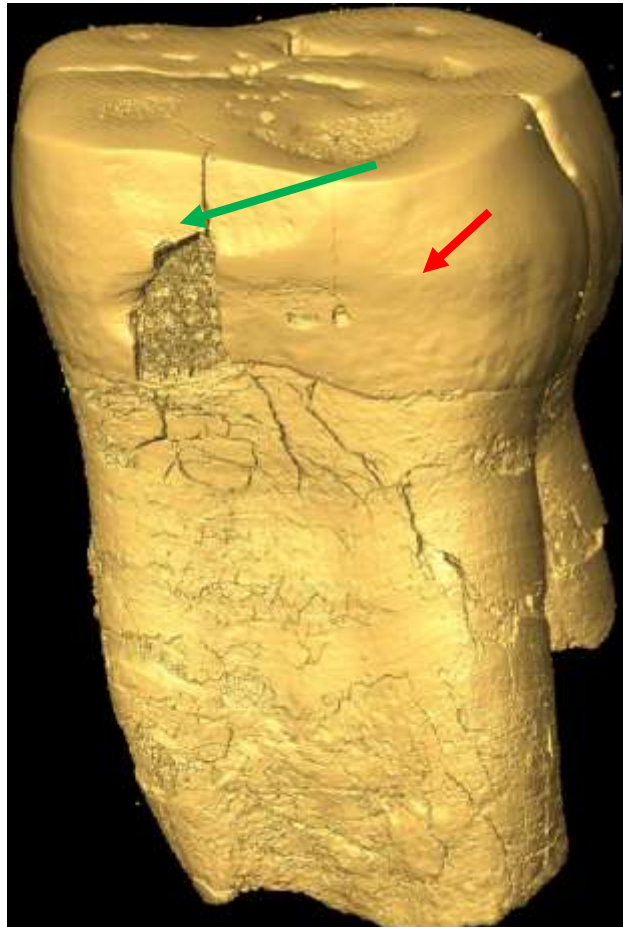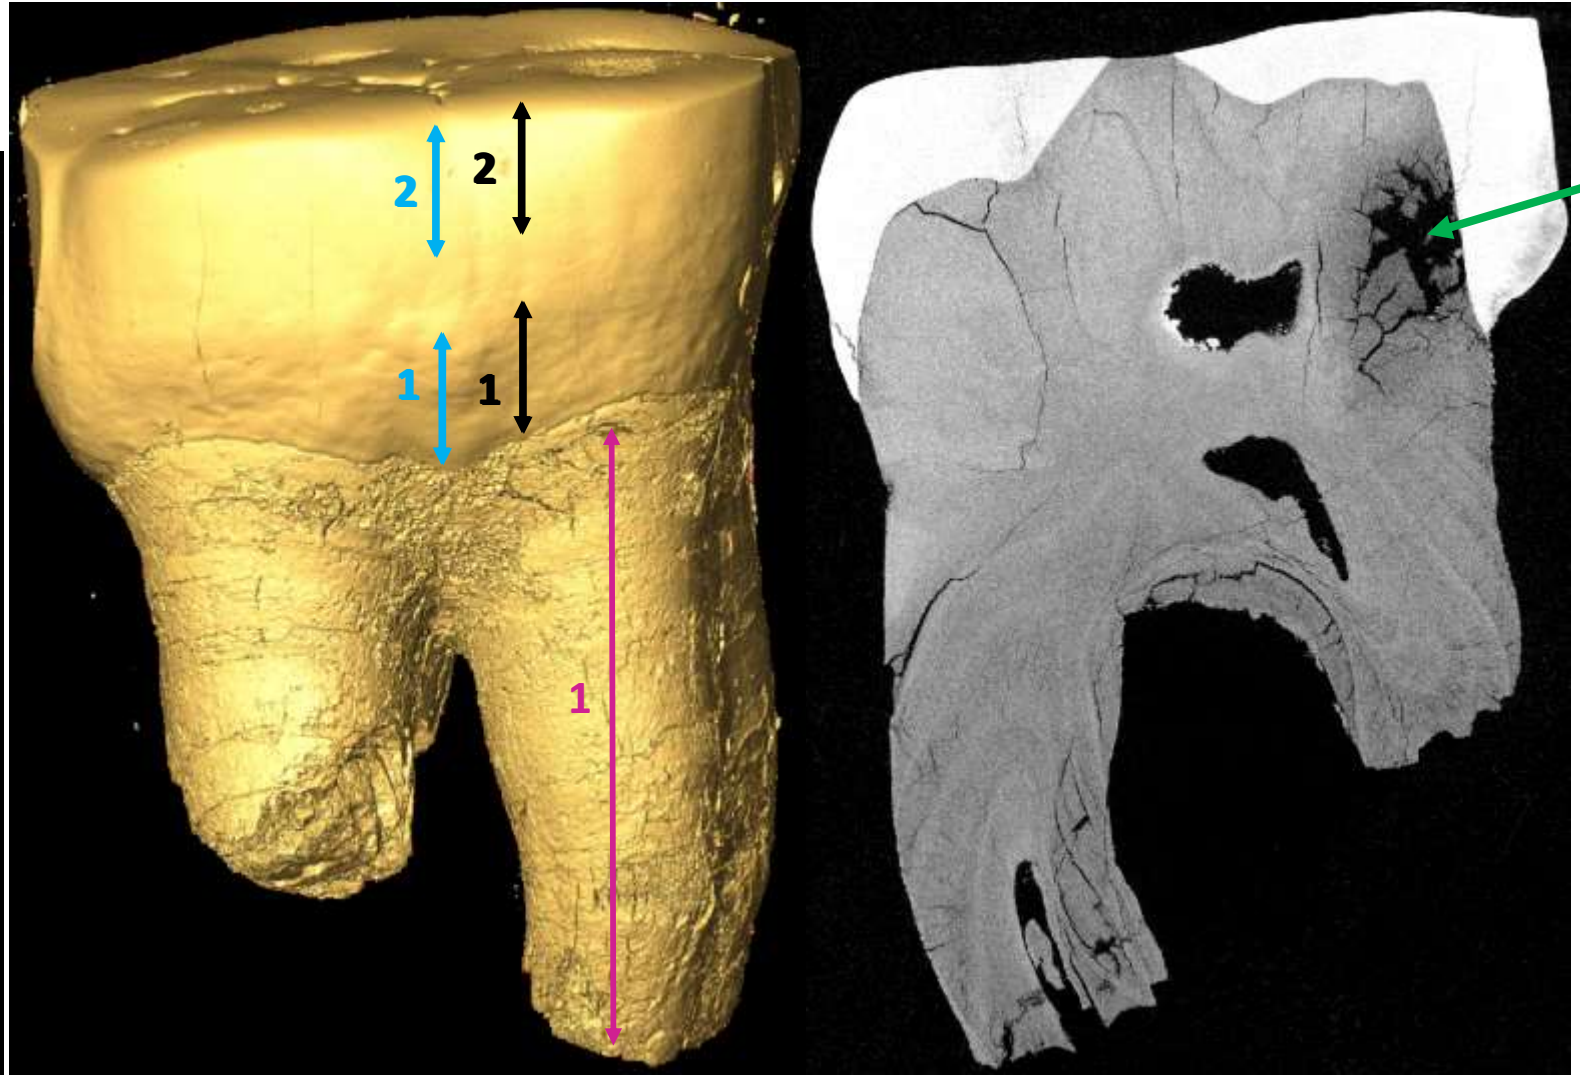

Note: Many small hypoplasia on the root

35959

Ind. unassigned

LxI#

Black: Strontium isotope

Blue: Zinc isotope

Purple: Collagen

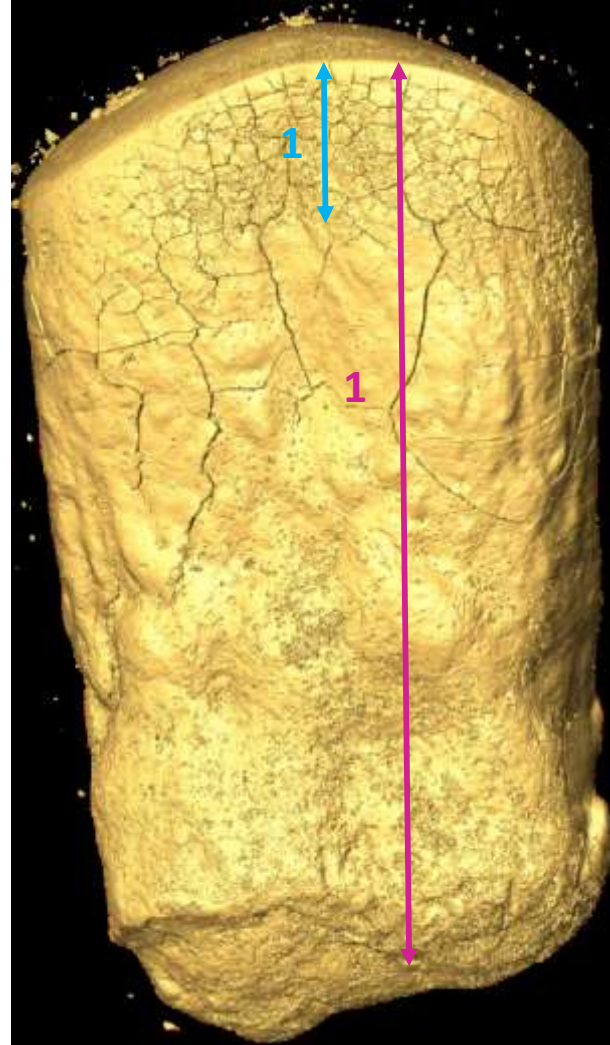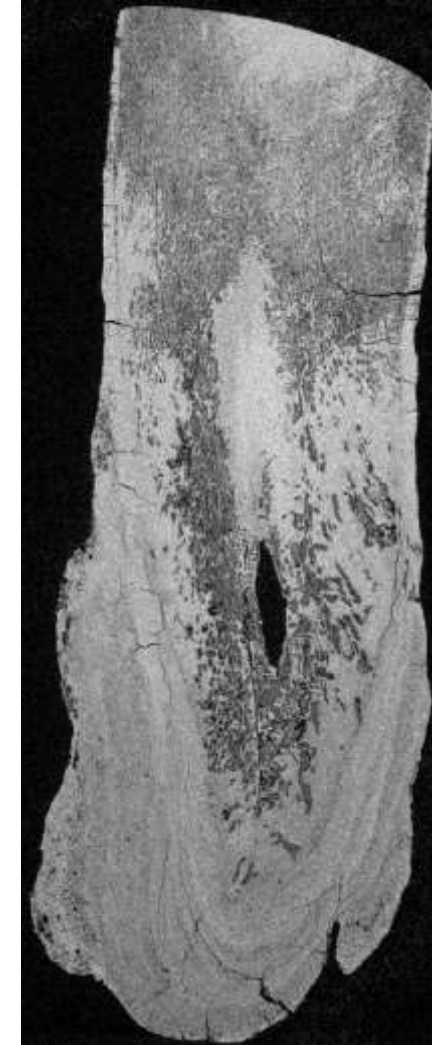

Note: stress lines on the cement

35968

unassigned

ULM3

Black: Strontium isotope

Blue: Zinc isotope

Purple: Collagen

Red: Hypoplasia

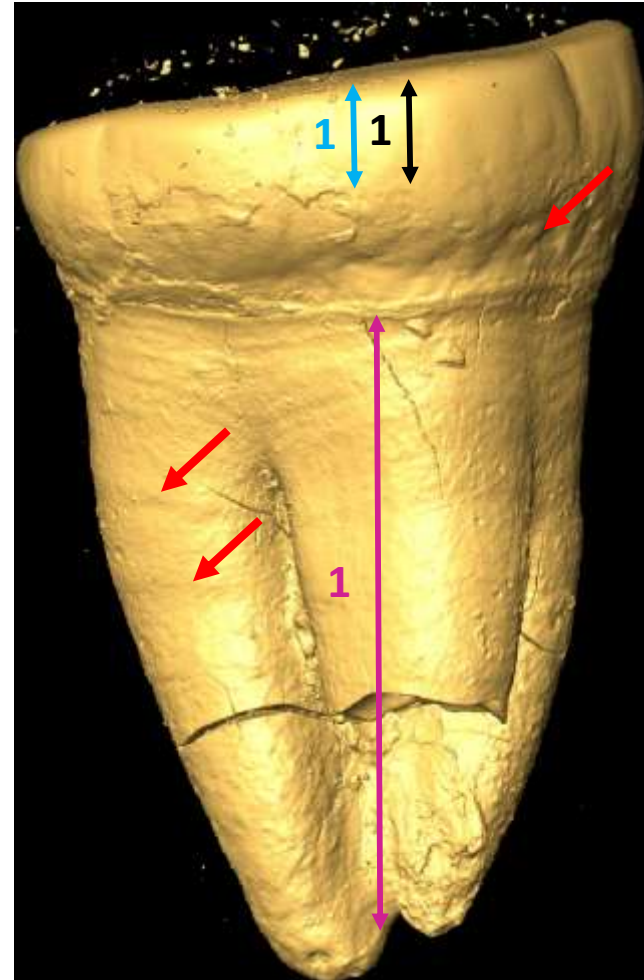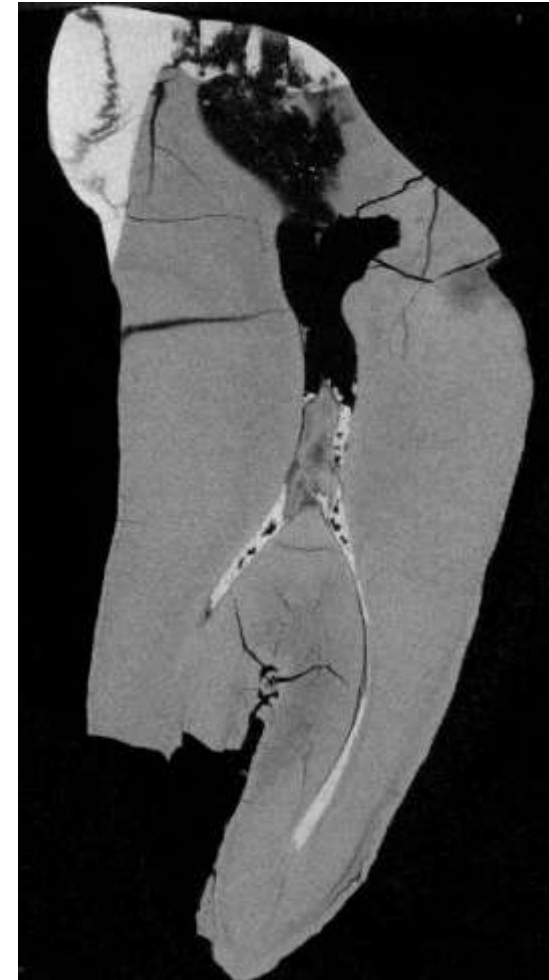

Note: Very worn tooth



35969

unassigned

LRI2

Black: Strontium isotope

Blue: Zinc isotope

Purple: Collagen

Red: Hypoplasia

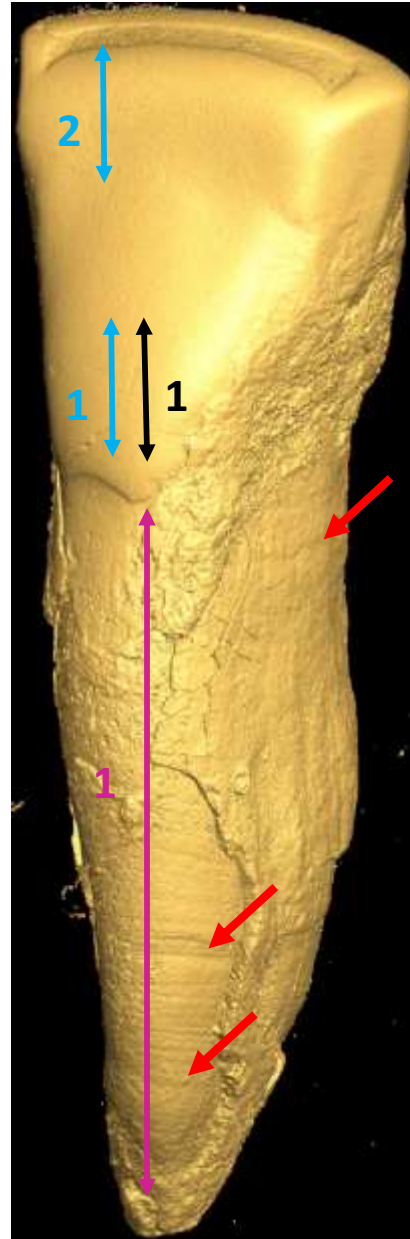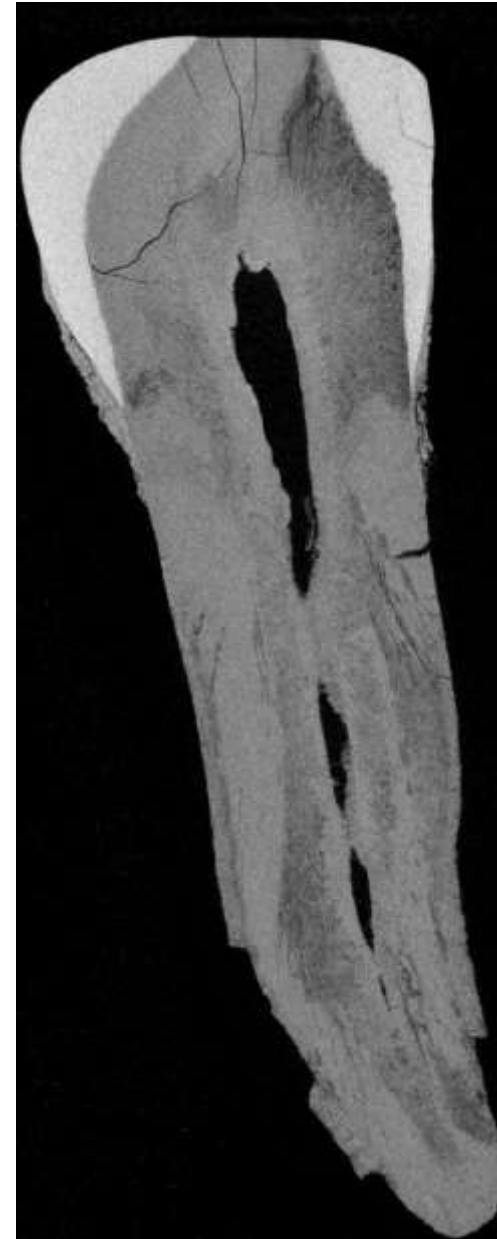

35970

Ind. 1

UxM#

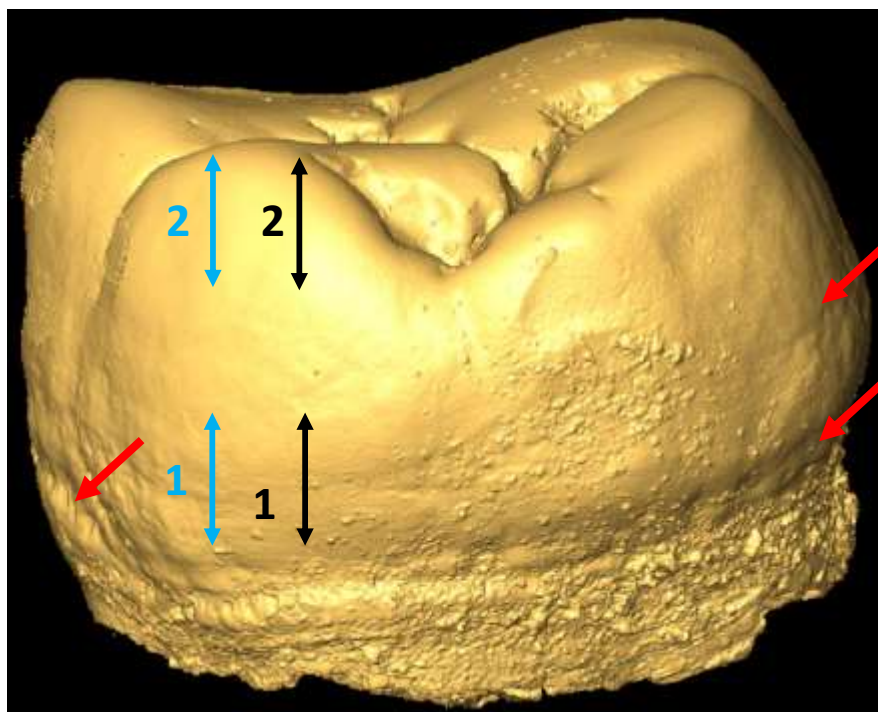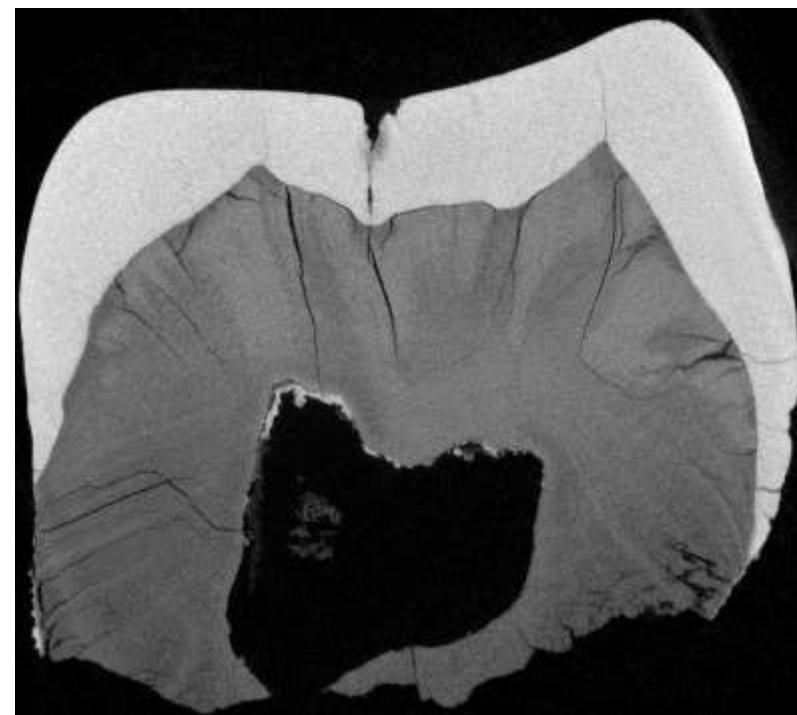

Black: Strontium isotope

Blue: Zinc isotope

Purple: Collagen

Red: Hypoplasia

Note: Tooth full of stress

35967

Ind. 1

LRI2

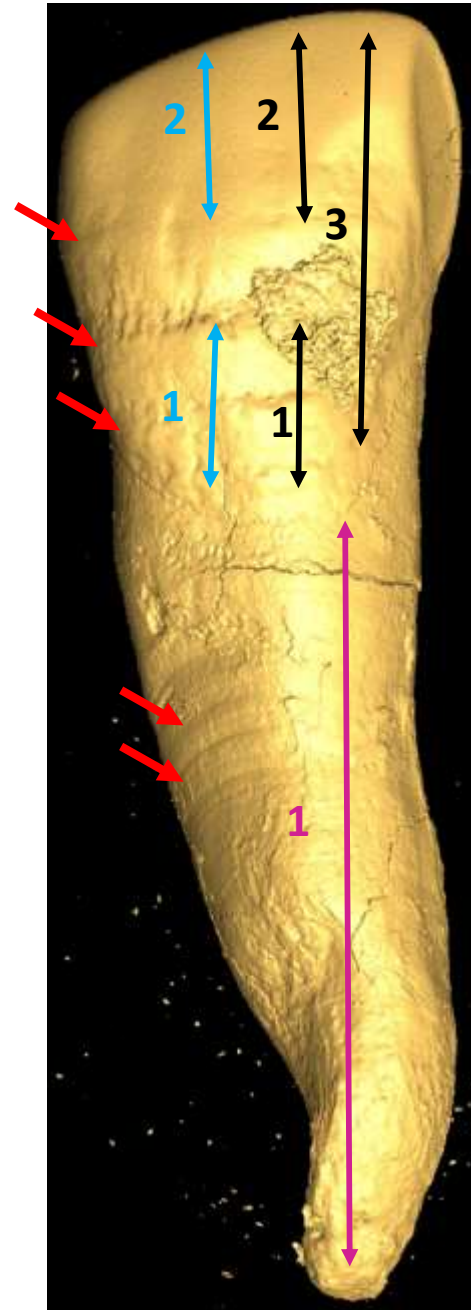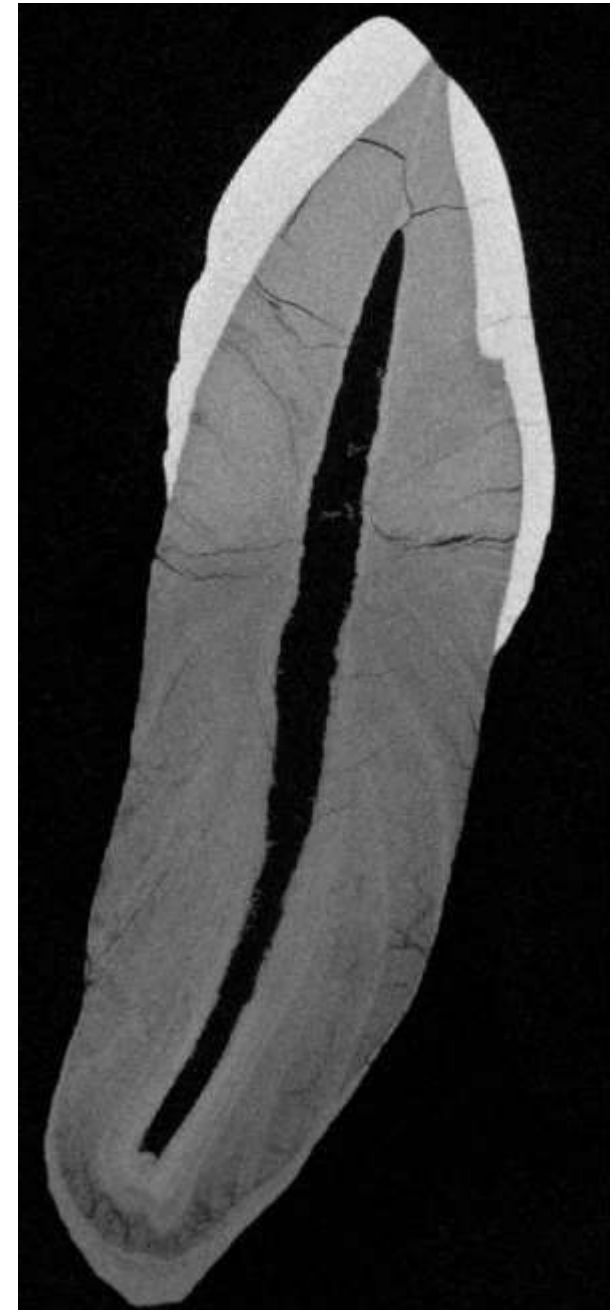

Black: Strontium isotope

Blue: Zinc isotope

Purple: Collagen

Red: Hypoplasia

Note: Tooth full of stress

35971.A

Ind. 5

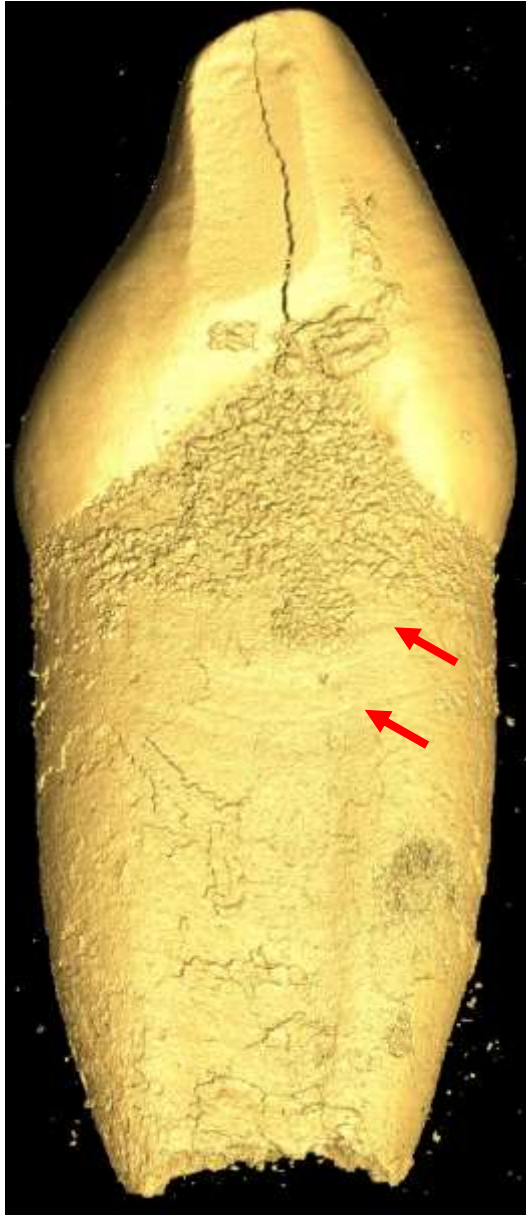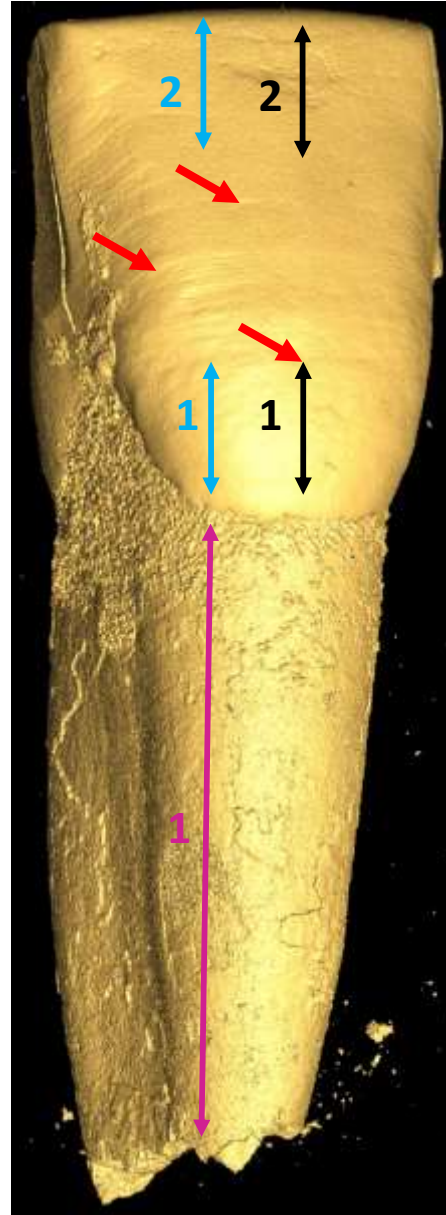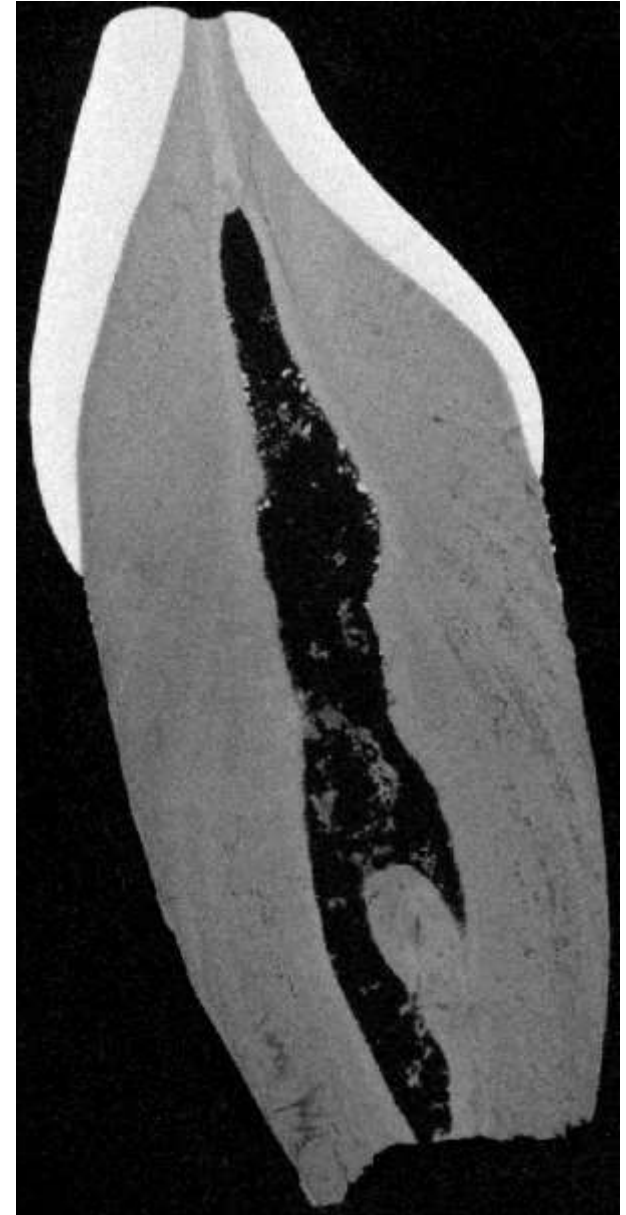

Black: Strontium isotope

Blue: Zinc isotope

Purple: Collagen

Red: Hypoplasia

LLI1

Note: Tooth full of stress

35971.B

Ind. 5

LRM1

Black: Strontium isotope

Blue: Zinc isotope

Purple: Collagen

Red: Hypoplasia

Yellow: recrystallisation

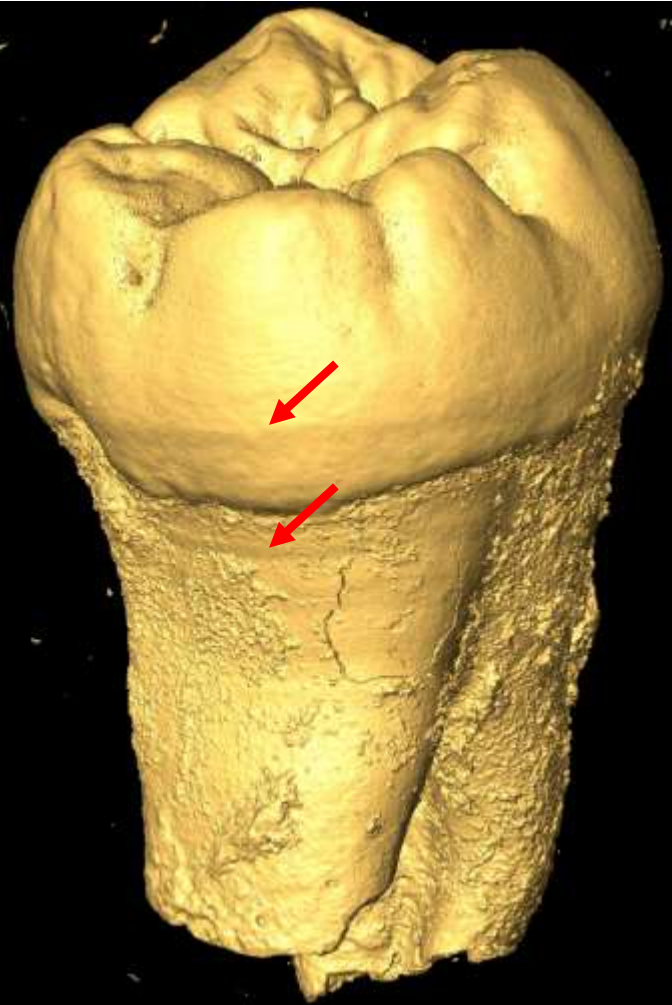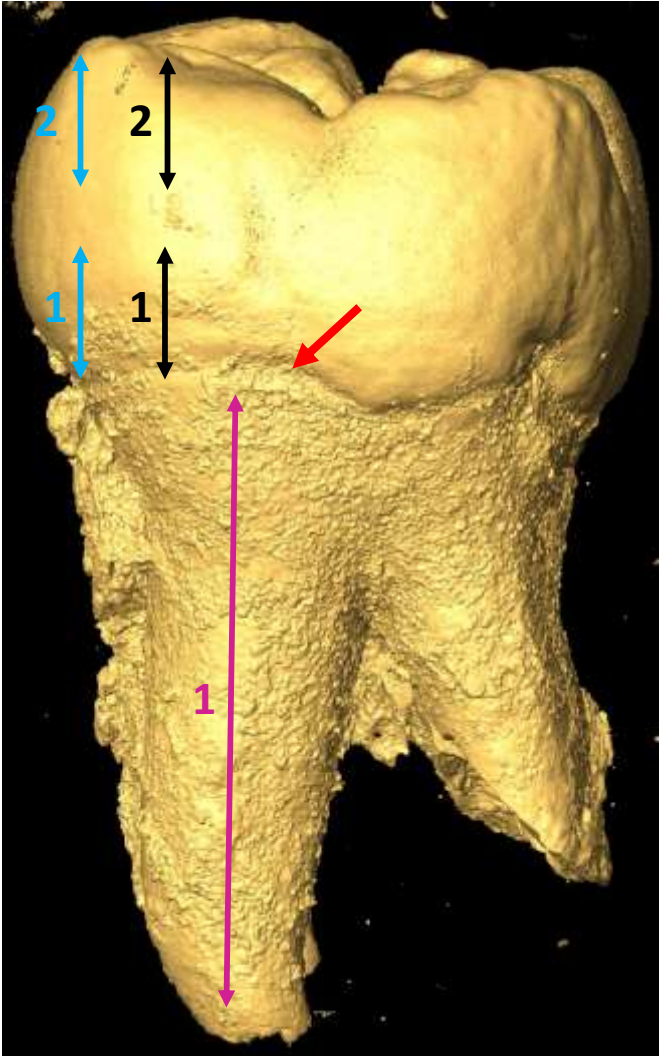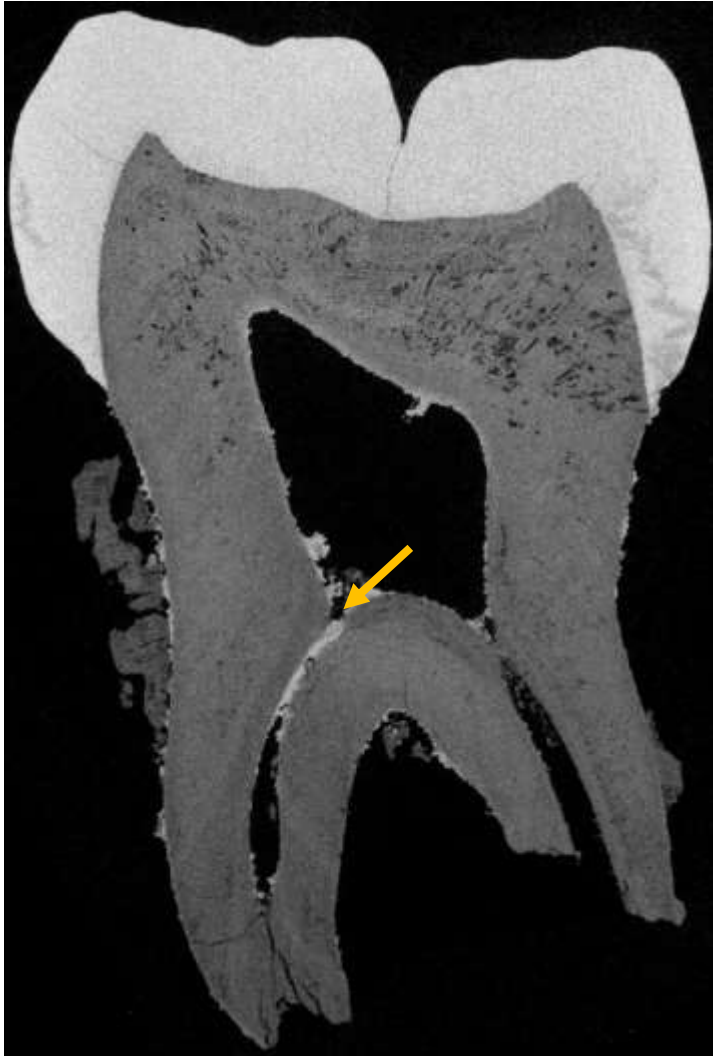

35976

Ind. unassigned

LRM#

Black: Strontium isotope

Blue: Zinc isotope

Purple: Collagen

Red: Hypoplasia

Green: Caries

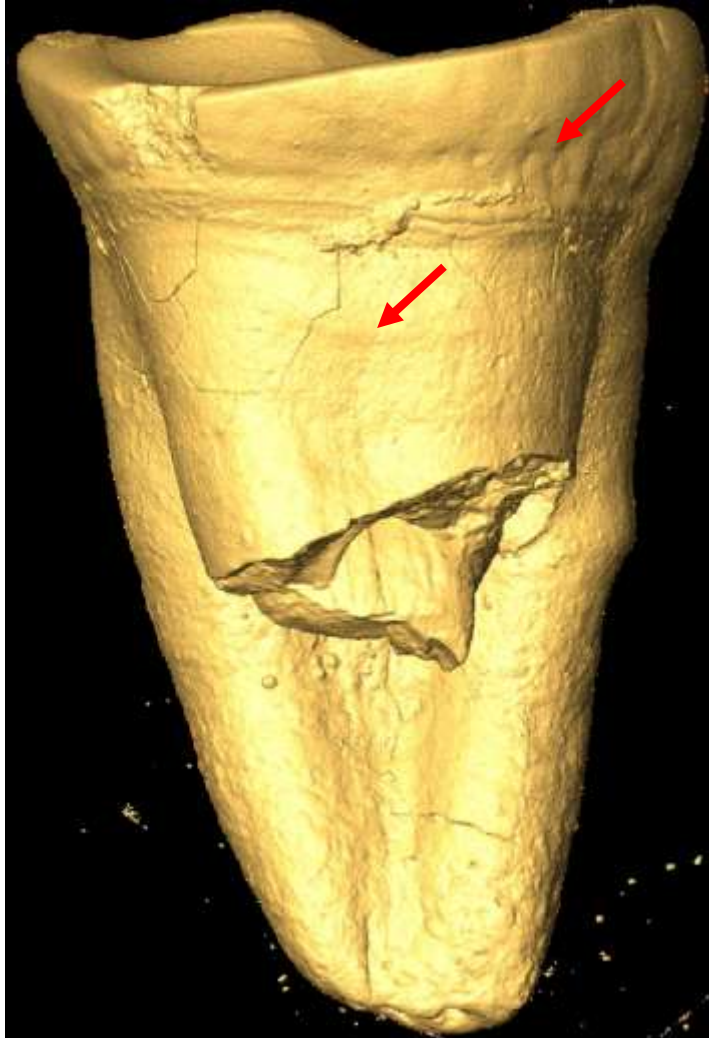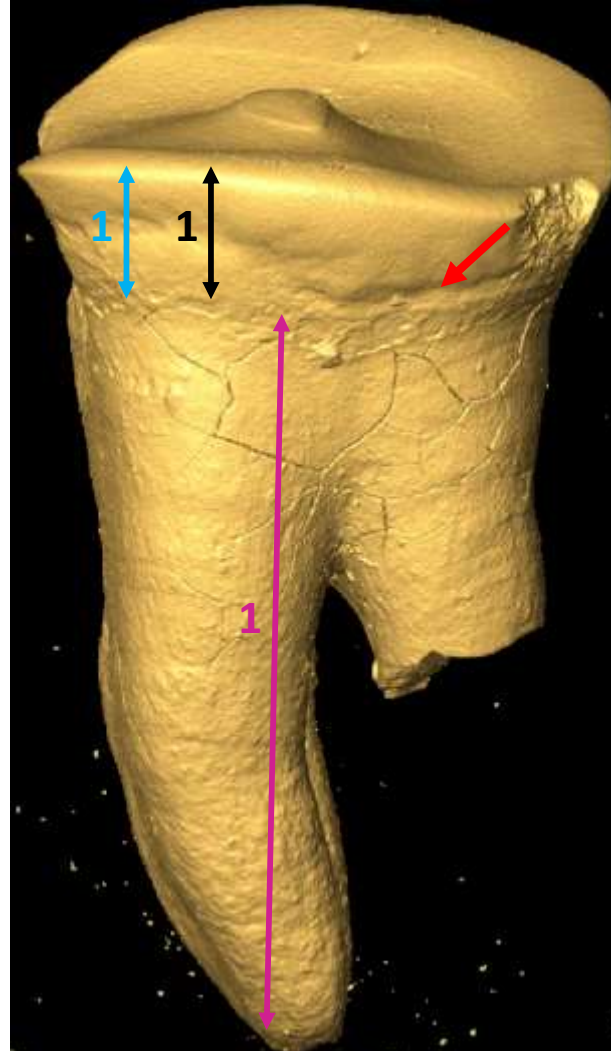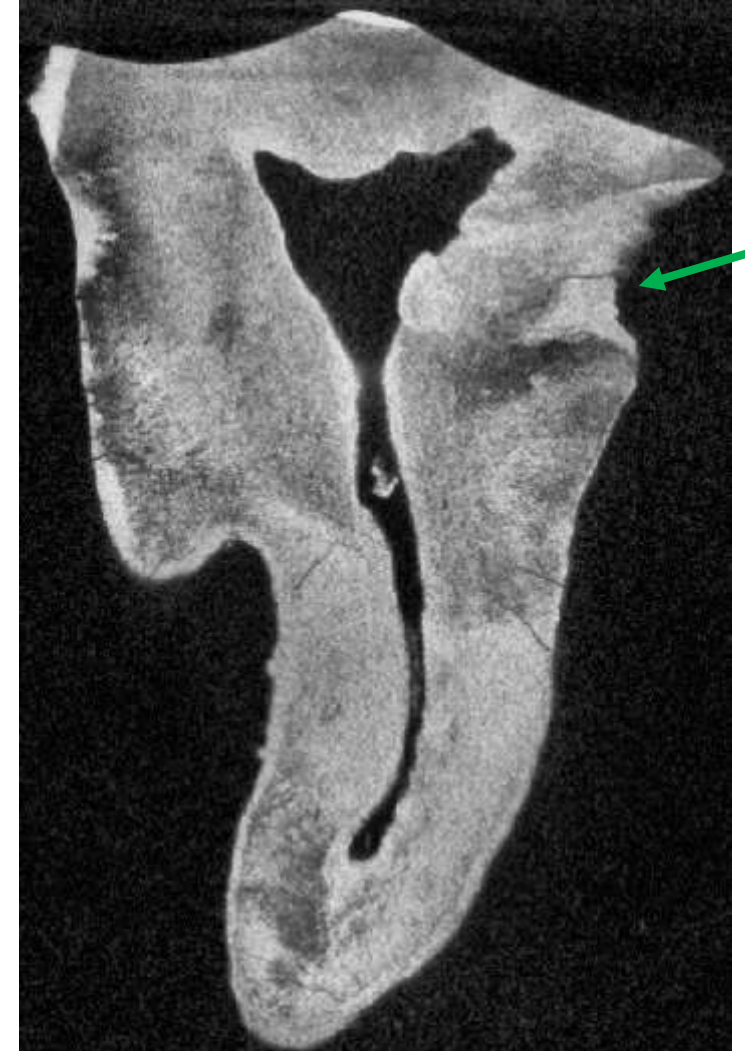

Note: Tooth intensely worn

35972

Ind. unassigned

LLP3

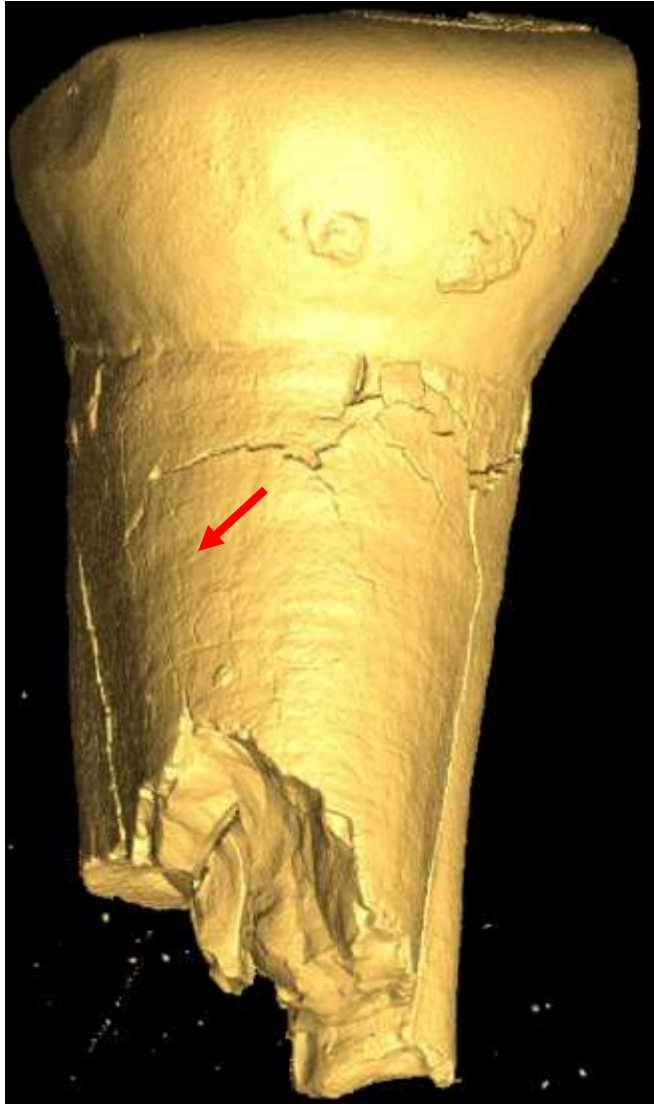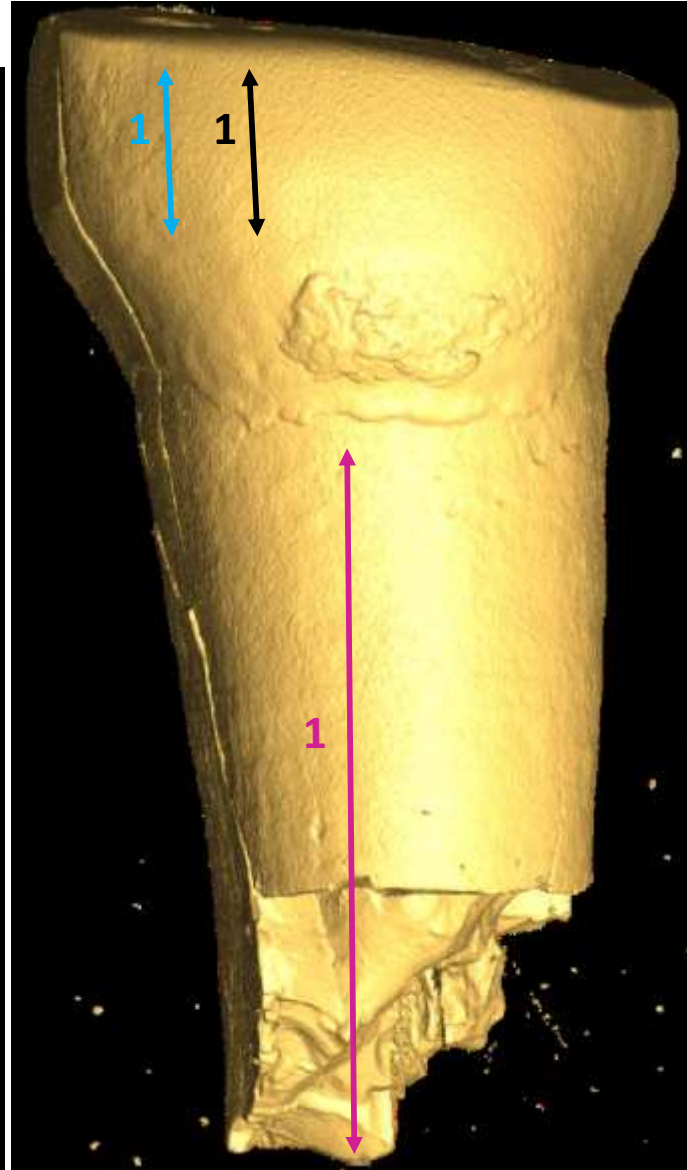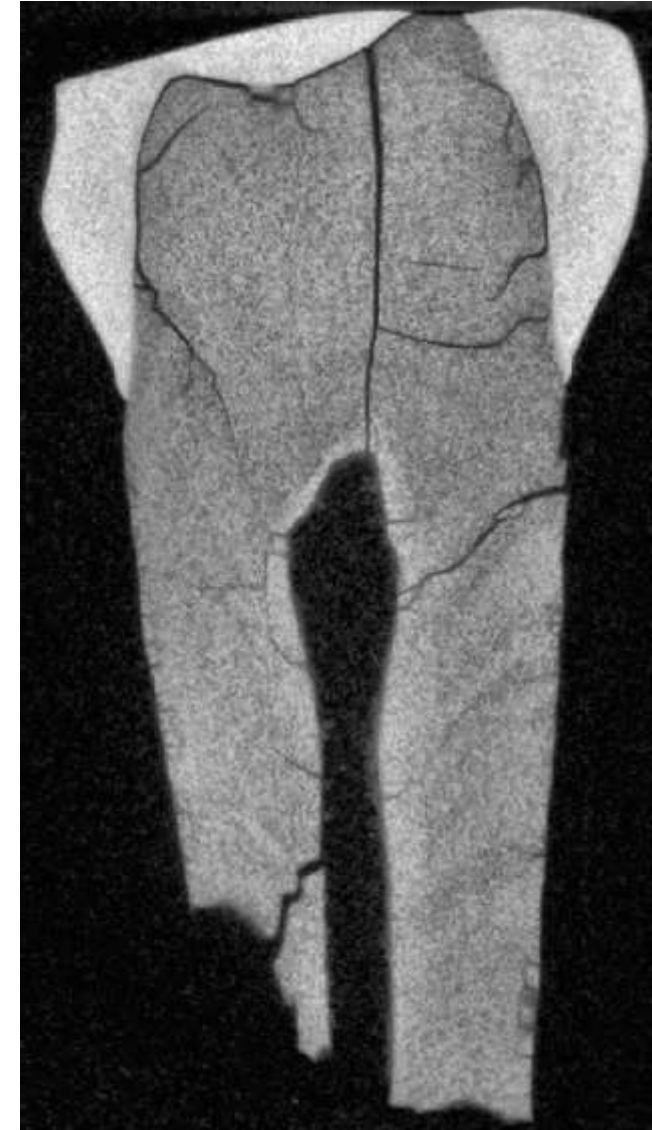

Black: Strontium isotope

Blue: Zinc isotope

Purple: Collagen

Red: Hypoplasia

Note: Many stress on the tooth

35973

Ind. unassigned

LRI2

Black: Strontium isotope

Blue: Zinc isotope

Purple: Collagen

Red: Hypoplasia

**Note:** tooth intensely worn

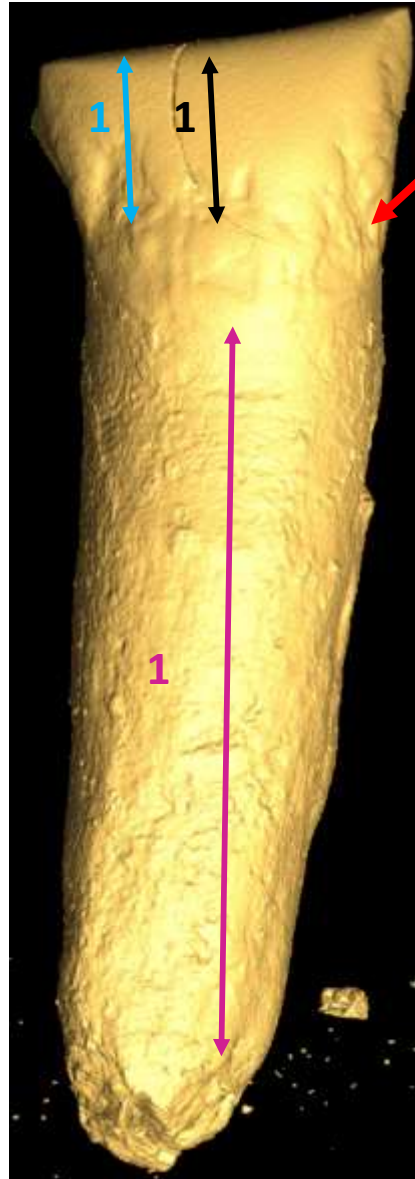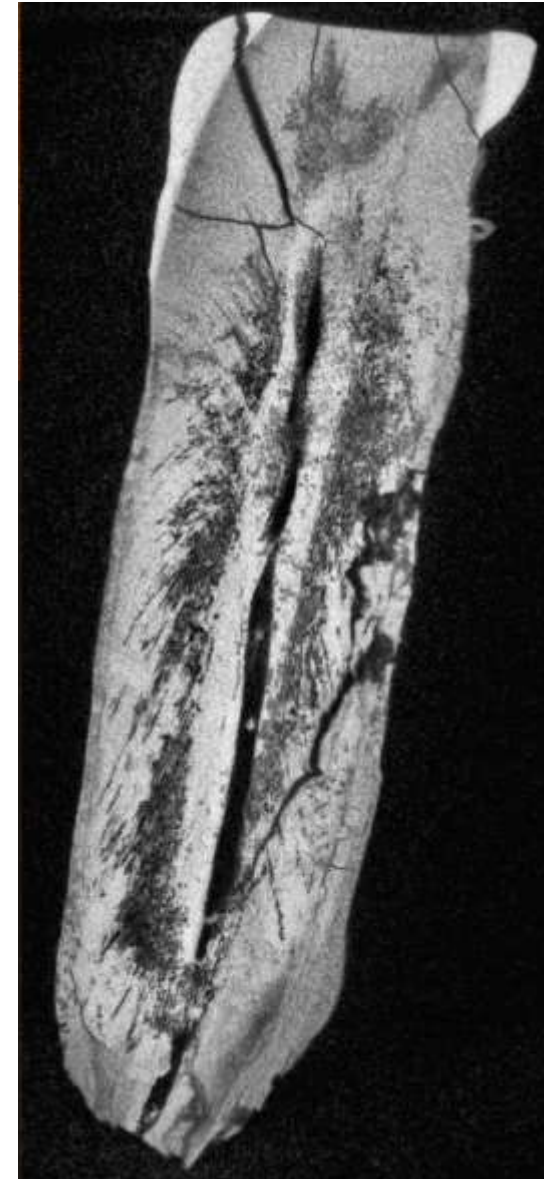



35979

Ind. 1

LRP4

Black: Strontium isotope

Blue: Zinc isotope

Purple: Collagen (Carbon, Nitrogen, CSIA, Sulphur)

Red: Hypoplasia

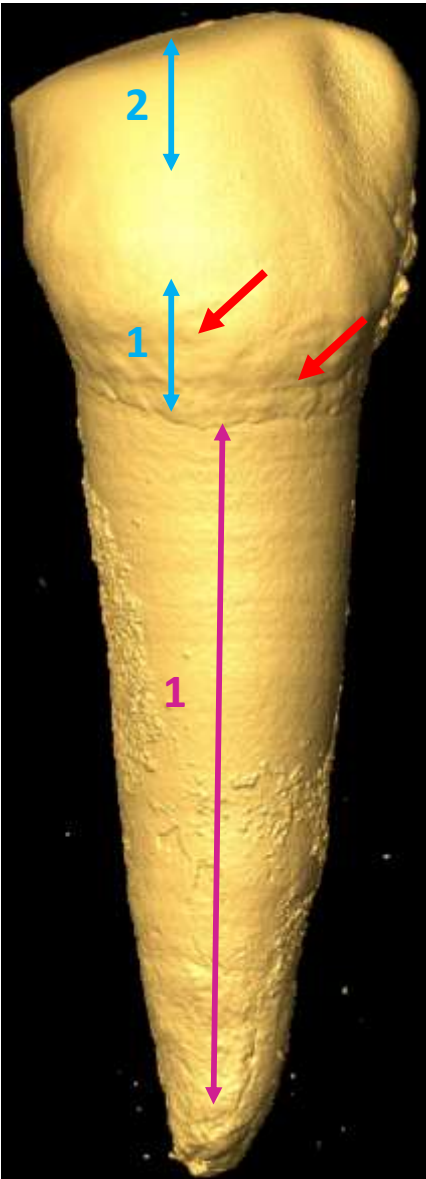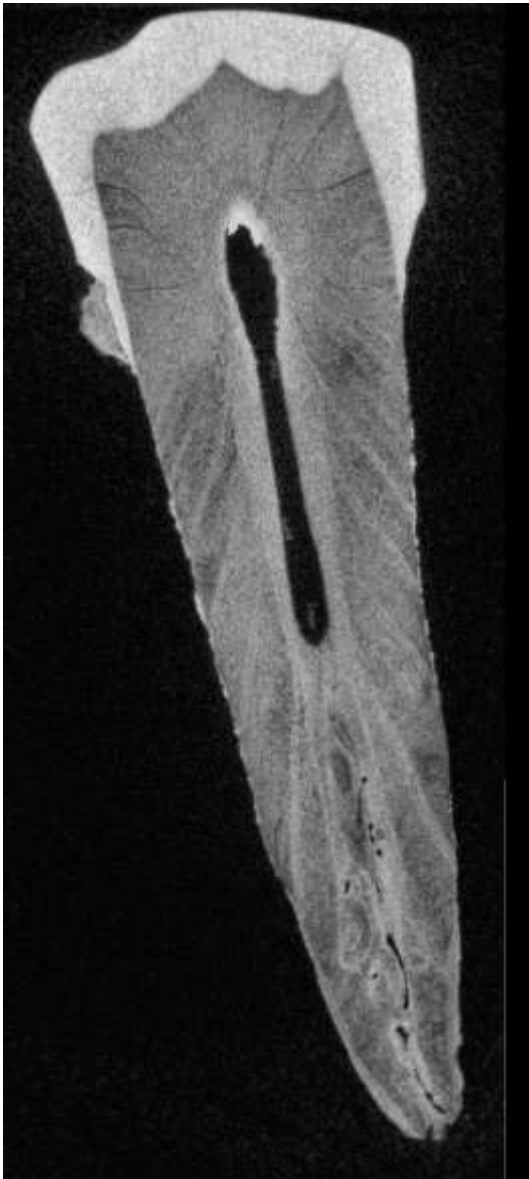

Note: Many hypoplasia on the root

35977

Ind. 5

ULM2

Black: Strontium isotope

Blue: Zinc isotope

Purple: Collagen

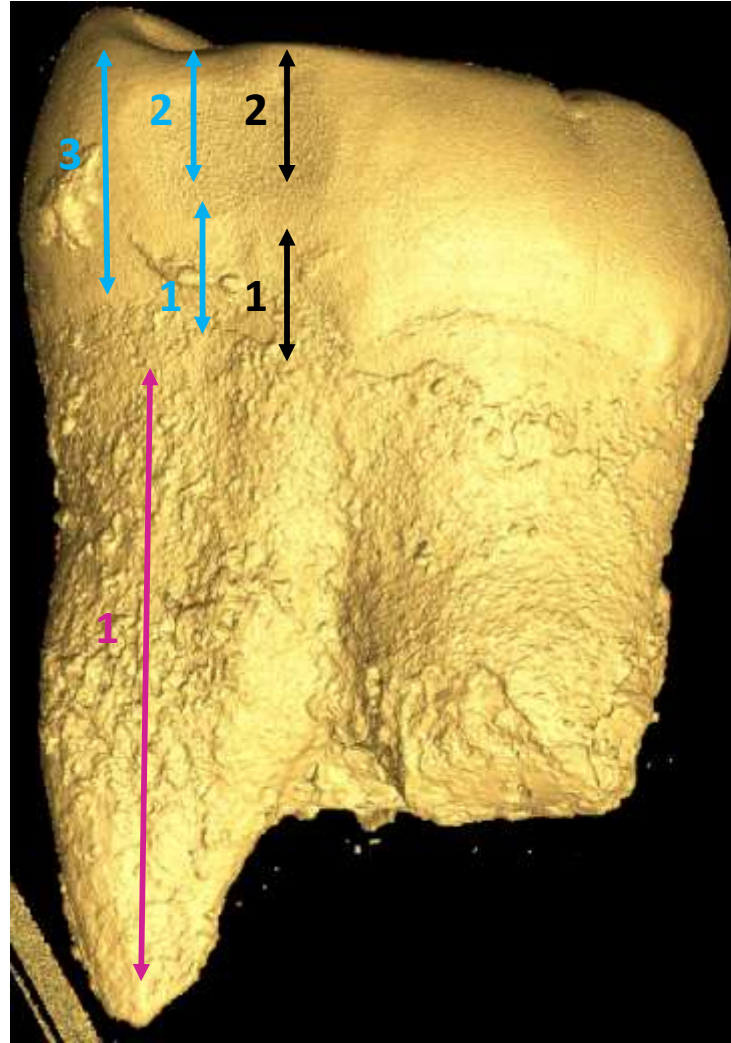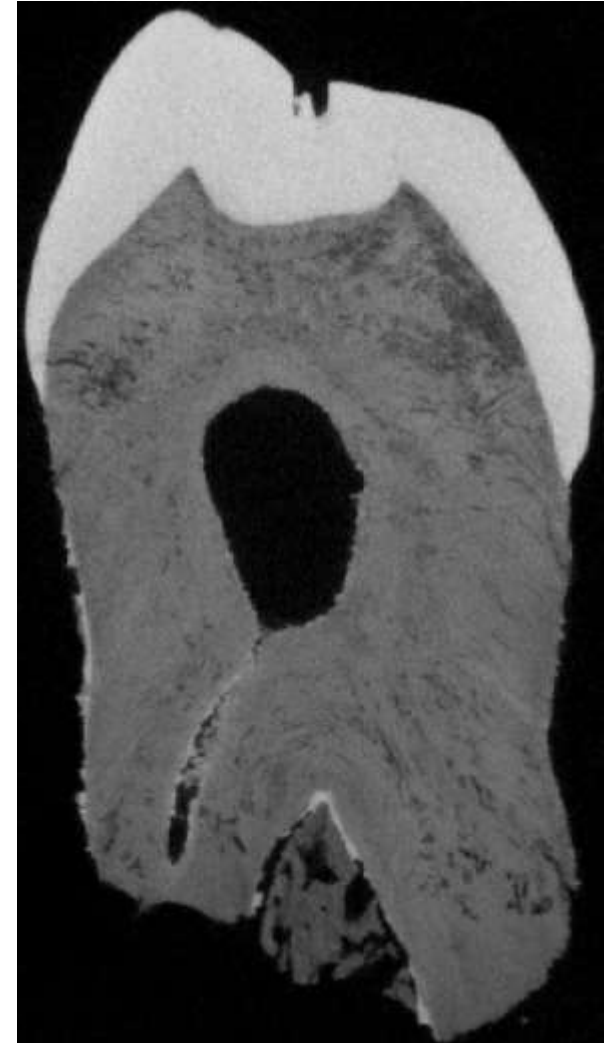

35978

Ind. 5

Black: Strontium isotope

Blue: Zinc isotope

Purple: Collagen

ULC

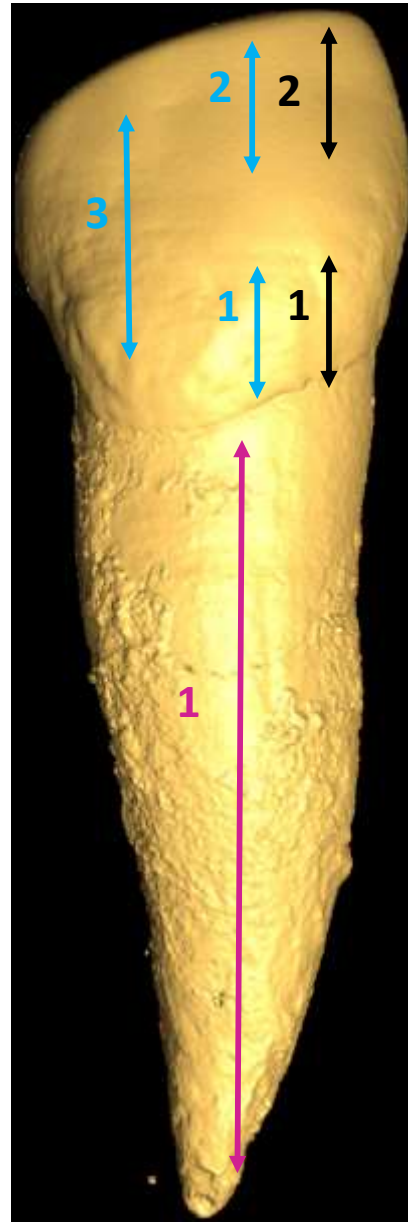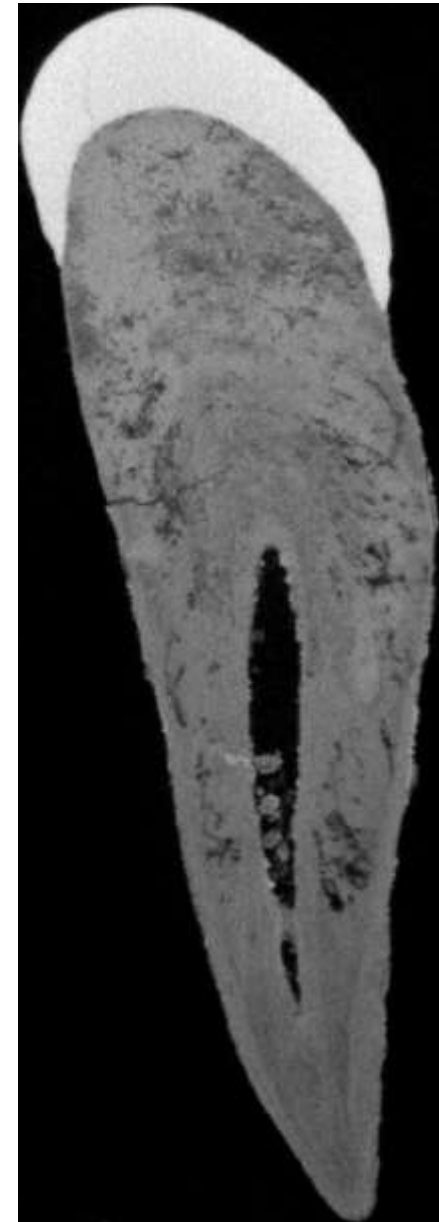

SEVA: 35980

Ind. 14

Black: Strontium isotope

Blue: Zinc isotope

Purple: Collagen

Red: Hypoplasia

**Note:** Intense stress in the tooth.

LRP4

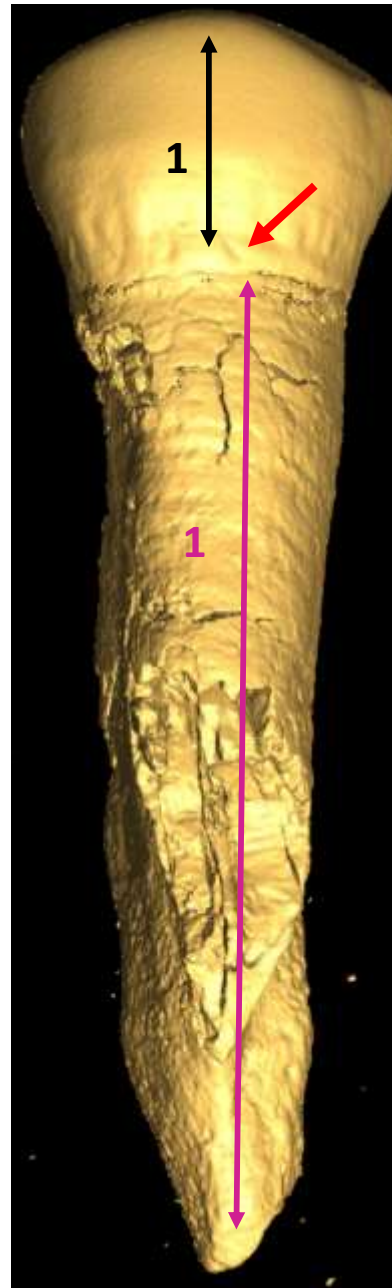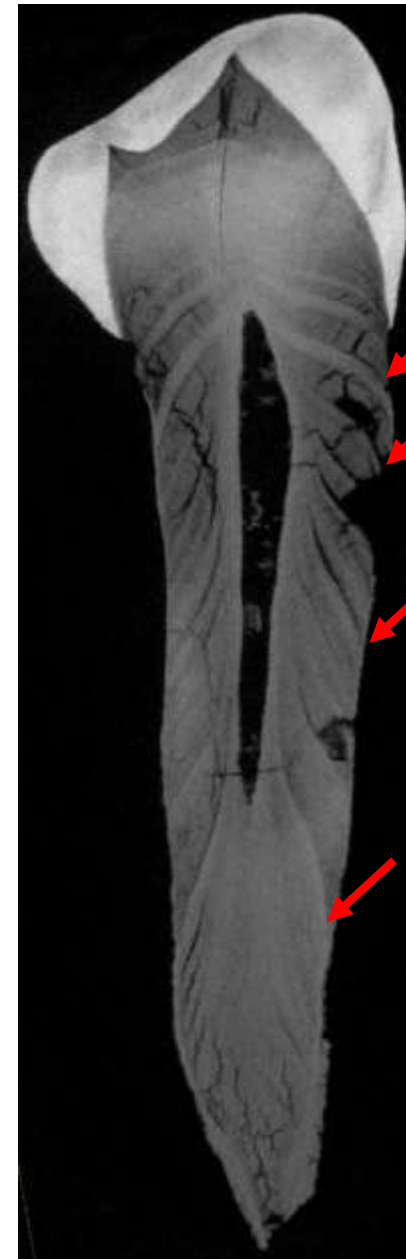

35974

Ind. unassigned

Black: Strontium isotope

Blue: Zinc isotope

Purple: Collagen

Red: Hypoplasia

Green: Caries

ULM3

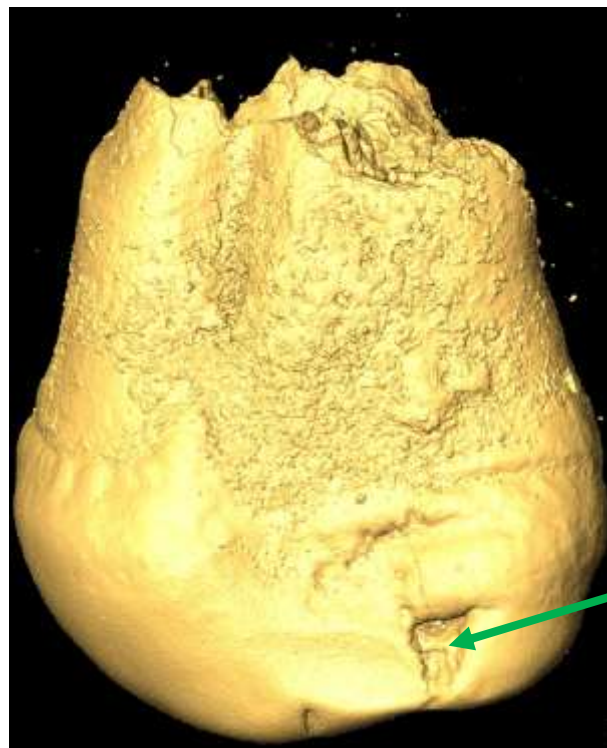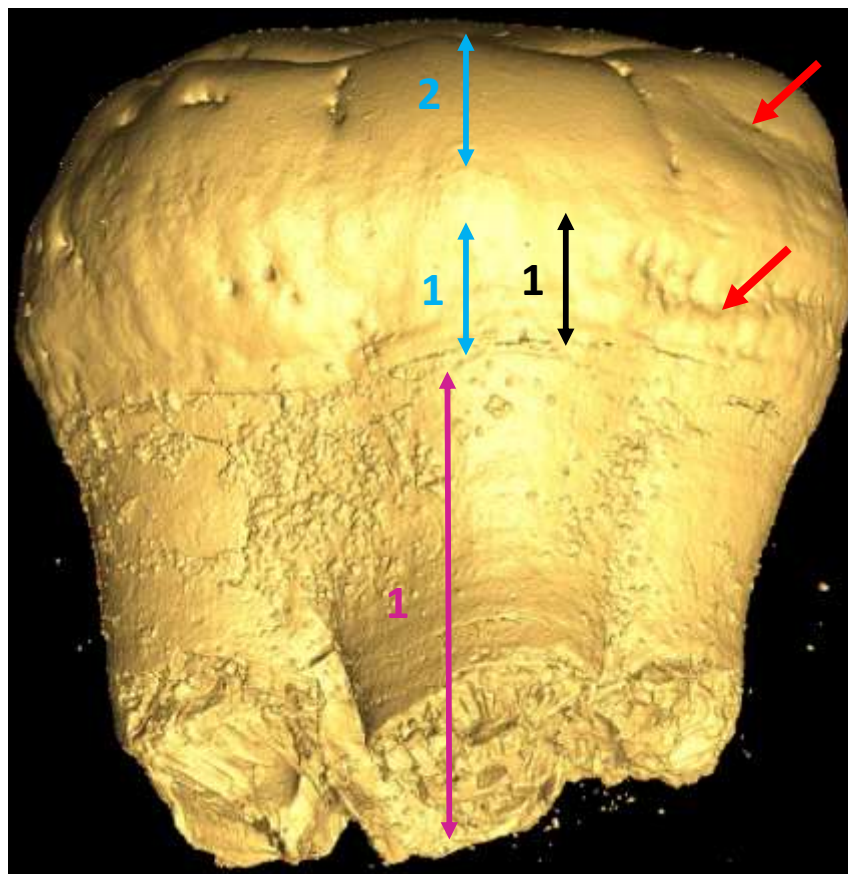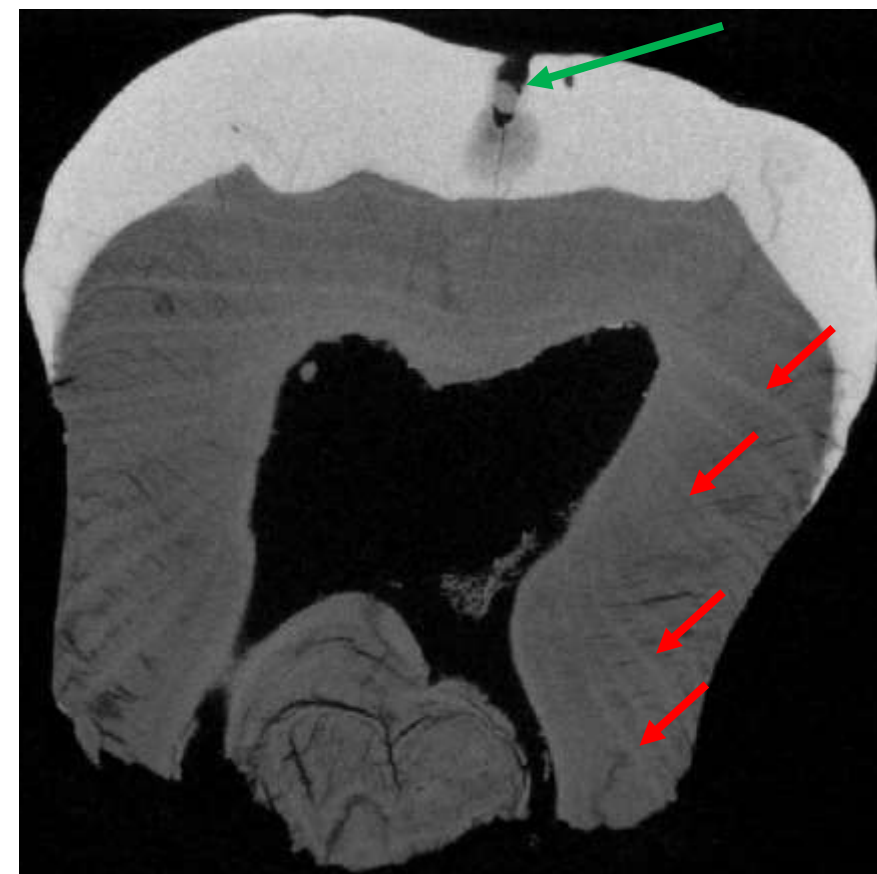

35975

Ind. 13

LRM3

Black: Strontium isotope

Blue: Zinc isotope

Purple: Collagen

Red: Hypoplasia

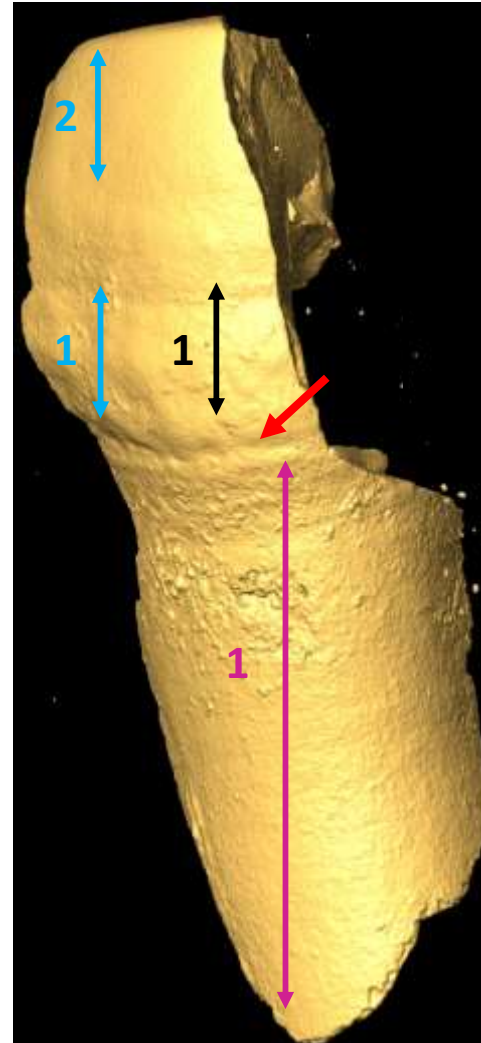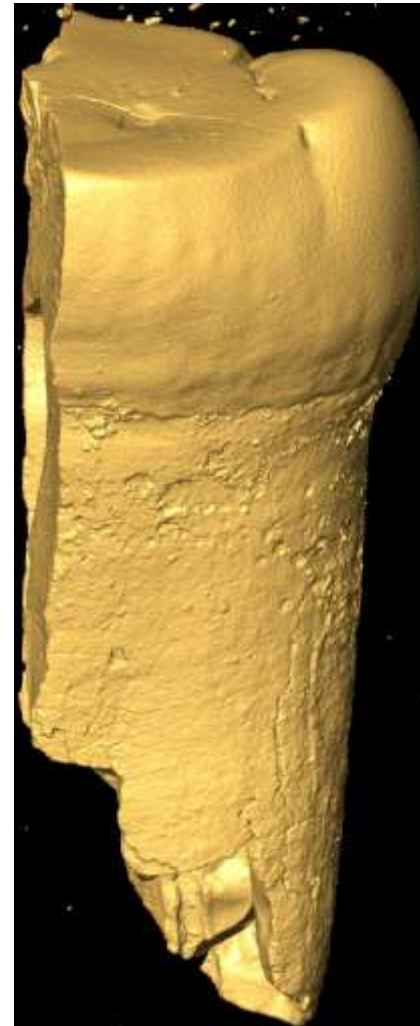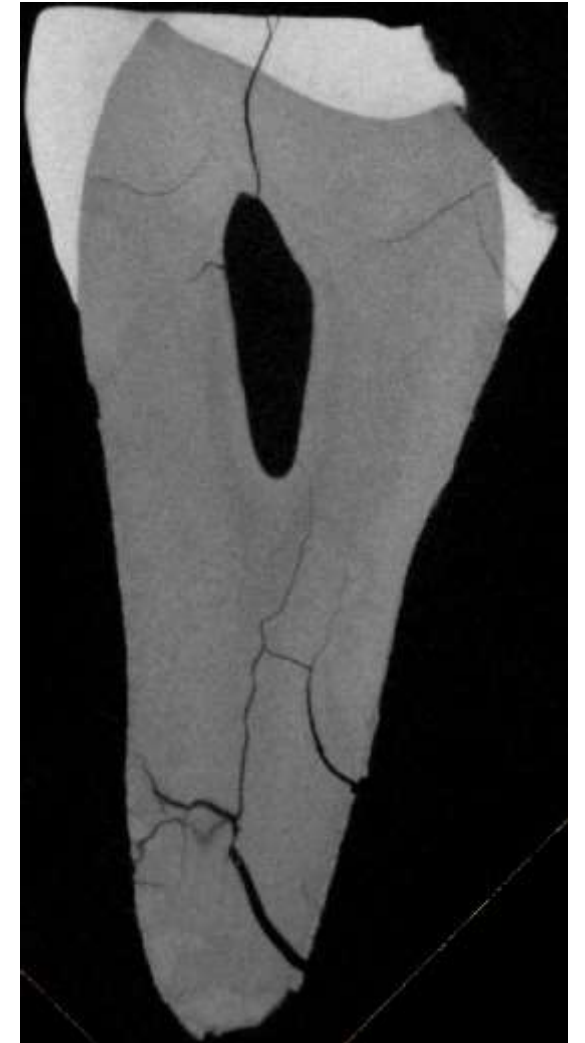

Supplement: 41559_2024_2382_MOESM1_ESM.pdf [file 41559_2024_2382_MOESM1_ESM.pdf]
